# Supplementary material for: Distal iodine migration of arylalkynes via cyclic monoaryliodonium salts
Source: Royal Society of Chemistry journal article supplement (doi:10.1039/d3qo01712e), 2023-12-28

## Supporting Information

### Distal Iodine Migration of Arylalkynes via Cyclic Monoaryliodonium Salts

Kaitao Huang,<sup>§<sup>a</sup></sup> Xin You,<sup>§<sup>b</sup></sup> Bingling Luo,<sup>§<sup>c</sup></sup> Shijun Wen,<sup>\*<sup>c</sup></sup> and Daqian Zhu<sup>\*<sup>a,c</sup></sup>

<sup>a</sup>School of pharmacy, Guangdong Pharmaceutical University, 280 Waihuan East Road, Guangzhou 510006, China. E-mail: zhudaqian@gdpu.edu.cn.

<sup>b</sup>Department of Oncology, Molecular Oncology Research Institute, The First Affiliated Hospital of Fujian Medical University, No. 20 Chazhong Road, Fuzhou 350005, Fujian, China. Department of Oncology, National Regional Medical Center, Binhai Campus of the First Affiliated Hospital, Fujian Medical University, Fuzhou 350212, China.

<sup>c</sup>State Key Laboratory of Oncology in South China, Guangdong Provincial Clinical Research Center for Cancer, Sun Yat-sen University Cancer Center, Guangzhou 510060, P. R. China. E-mail: wenshj@sysucc.org.cn.

# Contents

|                                                                                              |     |
|----------------------------------------------------------------------------------------------|-----|
| 1 General information for the synthetic experiments.....                                     | S3  |
| 2 General information for the biological assay.....                                          | S3  |
| 3 General procedure for the synthesis of CMAIs 2.....                                        | S4  |
| 4 General one-pot procedure for the synthesis of <i>ortho</i> -iodo aromatic acetylenes..... | S7  |
| 5 General one-pot procedure for the synthesis of 1, 3-diynes.....                            | S11 |
| 6 Synthetic applications.....                                                                | S14 |
| 7 Synthesis of (iodoethynyl)benzene derivatives 1.....                                       | S16 |
| 8 X-ray crystallographic analysis for 2a.....                                                | S17 |
| 9 References.....                                                                            | S22 |
| 10 NMR spectra.....                                                                          | S23 |

## The general information for the synthetic experiments

Synthesis details for key compounds are described here. All solvents were commercially available and were used without a further purification unless stated. The chemicals used were either purchased from commercial sources or prepared according to literature procedures. The  $^1\text{H}$  and  $^{13}\text{C}$  nuclear magnetic resonance (NMR) spectra were recorded on a Bruker Avance spectrometer 400 at 400 MHz and 100 MHz respectively. Chemical shifts are given in ppm ( $\delta$ ) referenced to  $\text{CDCl}_3$  with 7.26 for  $^1\text{H}$  and 77.10 for  $^{13}\text{C}$ , and to  $d_6$ -DMSO with 2.50 for  $^1\text{H}$  and 39.5 for  $^{13}\text{C}$ . In the case of multiplet, the signals are reported as intervals. Signals are abbreviated as follows: s, singlet; d, doublet; t, triplet; q, quartet; m, multiplet. Coupling constants are expressed in hertz. High-resolution mass spectra (HRMS) were recorded on Thermo Fisher spectrometer, Orbitrap QExactive GC/MS (EI mode) and Orbitrap QExactive LC/MS (ESI mode) or BRUKER VPXII spectrometer (ESI mode). The progress of the reactions was monitored by thin-layer chromatography on a glass plate coated with silica gel with fluorescent indicator (GF254). Column chromatography was performed on silica gel (200-300 mesh).

### Cell Lines.

The human lung cancer cell line A549, DLD1, and PANC1 were obtained from ATCC. All cells were cultured in RPMI-1640 (Gibco, Carlsbad, CA), supplemented with 10% fetal bovine serum (FBS, Biological Industries) at 37 °C and 5%  $\text{CO}_2$ . All cells used in the study had been tested for mycoplasma contamination every three weeks.

### Cell Viability Assay.

Cell viability was determined by the MTS assay.

MTS [3-(4,5-dimethylthiazol-2-yl)-5-(3-carboxymethoxyphenyl)-2-(4-sulfophenyl)-2H-tetrazolium, inner salt] can be reduced by dehydrogenase enzymes in metabolically active cells into a colored formazan product that is soluble in the medium and is directly detected by visible light absorption at 490 nm with a 96-well plate reader. A549 (3000 cells/well in 100  $\mu\text{L}$  of medium), DLD1 (2000 cells/well in 100  $\mu\text{L}$  of medium), and PANC1 (3000 cells/well in 100  $\mu\text{L}$  of medium) cells were seeded in 96-well plates for 24 h. Then, they were exposed to gradient concentrations of compound **2** for 3 days. After the indicated incubation time, 20  $\mu\text{L}$  of MTS was added to each well and cells were incubated for an additional 4 h at 37 °C supplied with 5% carbon dioxide. Then, the optical density (OD) was determined at a wavelength of 490 nm with a BioTek Gen5 microplate reader (BioTek Instruments, Winooski, VT).

| compound  | IC50 ( $\mu\text{M}$ ) |       |        |
|-----------|------------------------|-------|--------|
|           | A549                   | DLD 1 | PANC 1 |
| <b>2a</b> | 3.54                   | 2.76  | 1.22   |
| <b>2b</b> | 5.37                   | 3.85  | 0.71   |
| <b>2c</b> | 3.13                   | 2.07  | 0.55   |
| <b>2d</b> | 2.20                   | 1.45  | 0.30   |
| <b>2e</b> | 1.15                   | 0.51  | 0.62   |
| <b>2f</b> | 3.34                   | 1.55  | 0.30   |
| <b>2g</b> | 2.26                   | 1.30  | 0.30   |
| <b>2h</b> | 2.14                   | 1.47  | 0.65   |

**Table S1.** Anticancer potency of cyclic monoaryliodonium salts against A549, DLD1, PANC1.

### General procedure for the synthesis of cyclic monoaryliodonium salts (**2**):

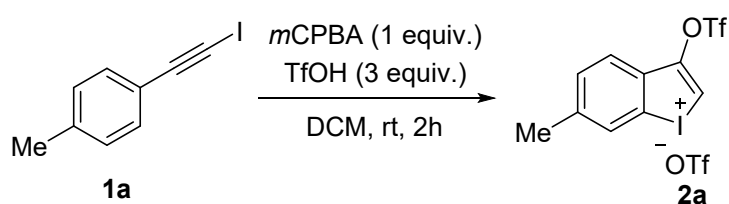

To a stirred solution of **1a** (48 mg, 0.2 mmol) in DCM (2 mL) was added TfOH (52.5  $\mu\text{L}$ , 0.6 mmol) at rt, then a solution of *m*-CPBA (85%, 40.7 mg, 0.2 mmol) in DCM (2 mL) was added dropwise, rt. The solution was stirred for 2h at r.t. before DCM was removed by rotary evaporation. The residue was purified by column chromatography on a silica gel (PE/EtOAc = 10/1-3/1, DCM/EtOAc = 3/1-1/1) to provide product **2a** (79 mg, 74% yield) as a light yellow solid.

### 6-methyl-3-(((trifluoromethyl)sulfonyl)oxy)benzo[b]iodol-1-ium trifluoromethanesulfonate (**2a**):

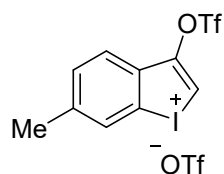

<sup>1</sup>H NMR (400 MHz, DMSO)  $\delta$  8.71 (s, 1H), 8.14 (s, 1H), 7.80 – 7.74 (m, 2H), 2.52 (s, 3H) ppm. <sup>13</sup>C NMR (100 MHz, DMSO)  $\delta$  149.8, 143.2, 132.0, 130.3, 126.2, 120.7 (q,  $J$  = 257 Hz), 120.1, 108.0, 21.4 ppm. <sup>19</sup>F NMR (376 MHz, DMSO)  $\delta$  -72.4, -77.8 ppm. HRMS (ESI) for C<sub>10</sub>H<sub>7</sub>F<sub>3</sub>IO<sub>3</sub>S [M-TfO]<sup>+</sup> Calculated: 390.91072, found: 390.91074.

**3-(((trifluoromethyl)sulfonyl)oxy)benzo[b]iodol-1-ium trifluoromethanesulfonate (2b):**

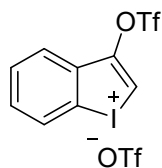

**2b** (64 mg, 60% yield, white solid) was synthesized according to the procedure for **2a**.  $^1\text{H}$  NMR (400 MHz, DMSO)  $\delta$  8.88 – 8.78 (m, 1H), 8.41 (s, 1H), 7.94 (t,  $J$  = 7.5 Hz, 1H), 7.82 (dd,  $J$  = 7.2, 5.9 Hz, 2H) ppm.  $^{13}\text{C}$  NMR (100 MHz, DMSO)  $\delta$  149.4, 134.5, 131.3, 130.8, 130.3, 125.9, 121.5, 120.9 (q,  $J$  = 310 Hz), 113.6 ppm.  $^{19}\text{F}$  NMR (376 MHz, DMSO)  $\delta$  -72.0, -72.7 ppm. HRMS (ESI) for  $\text{C}_9\text{H}_5\text{F}_3\text{IO}_3\text{S}$   $[\text{M-TfO}]^+$  Calculated: 376.89507, found: 376.89511.

**6-(tert-butyl)-3-(((trifluoromethyl)sulfonyl)oxy)benzo[b]iodol-1-ium trifluoromethanesulfonate (2c):**

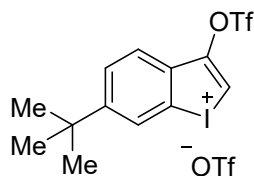

**2c** (78 mg, 67% yield, gray solid) was synthesized according to the procedure for **2a**.  $^1\text{H}$  NMR (400 MHz, DMSO)  $\delta$  8.74 (s, 1H), 8.36 (d,  $J$  = 1.4 Hz, 1H), 8.03 (dd,  $J$  = 8.4, 1.5 Hz, 1H), 7.80 (d,  $J$  = 8.3 Hz, 1H), 1.37 (s, 9H) ppm.  $^{13}\text{C}$  NMR (100 MHz, DMSO)  $\delta$  155.7, 149.7, 132.1, 128.6, 126.8, 126.2, 122.0, 120.7 (q,  $J$  = 257 Hz), 120.6, 119.4, 119.4, 116.8, 108.5, 35.7, 30.8 ppm.  $^{19}\text{F}$  NMR (471 MHz, DMSO)  $\delta$  -72.5, -77.8 ppm. HRMS (ESI) for :  $\text{C}_{13}\text{H}_{13}\text{F}_3\text{IO}_3\text{S}$   $[\text{M-TfO}]^+$  Calculated: 432.95767, found: 432.95786.

**6-fluoro-3-(((trifluoromethyl)sulfonyl)oxy)benzo[b]iodol-1-ium trifluoromethanesulfonate (2d):**

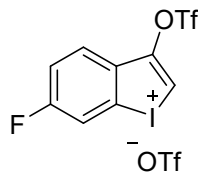

**2d** (62 mg, 57% yield, yellow solid) was synthesized according to the procedure for **2a**.  $^1\text{H}$  NMR (400 MHz, DMSO)  $\delta$  8.77 (s, 1H), 8.16 (dd,  $J$  = 7.7, 2.4 Hz, 1H), 7.91 (dd,  $J$  = 8.8, 4.9 Hz, 1H), 7.86 (td,  $J$  = 8.6, 2.4 Hz, 1H) ppm.  $^{13}\text{C}$  NMR (100 MHz, DMSO)  $\delta$  162.8 (d,  $J$  = 254 Hz), 148.8, 131.3 (d,  $J$  = 3 Hz), 128.4 (d,  $J$  = 10 Hz), 121.2 (d,  $J$  = 10 Hz), 119.7, 119.5, 119.4 (d,  $J$  = 60 Hz), 119.3, 118.2, 117.9, 116.5, 109.7 (d,  $J$  = 3 Hz) ppm.  $^{19}\text{F}$  NMR (471 MHz, DMSO)  $\delta$  -72.4, -77.8, -105.3, -105.3, -105.3, -

105.3, -105.3, -105.3 ppm. HRMS (ESI) for  $C_9H_4F_4IO_3S$  [M-TfO]<sup>+</sup> Calculated: 394.88565, found: 394.88586.

**6-chloro-3-(((trifluoromethyl)sulfonyl)oxy)benzo[b]iodol-1-ium trifluoromethanesulfonate (2e):**

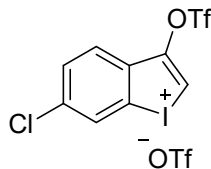

**2e** (60 mg, 54% yield, light yellow solid) was synthesized according to the procedure for **2a**. <sup>1</sup>H NMR (400 MHz, DMSO) δ 8.85 (s, 1H), 8.34 (s, 1H), 8.03 (dd, *J* = 8.5, 1.9 Hz, 1H), 7.86 (d, *J* = 8.5 Hz, 1H) ppm. <sup>13</sup>C NMR (100 MHz, DMSO) δ 149.0, 136.3, 133.6, 131.4, 129.9, 127.7, 121.3, 118.1 (q, *J* = 256 Hz), 110.6 ppm. <sup>19</sup>F NMR (471 MHz, DMSO) δ -72.4, -77.8 ppm. HRMS (ESI) for  $C_9H_4ClF_3IO_3S$  [M-TfO]<sup>+</sup> Calculated: 410.85610, found: 410.85635.

**6-bromo-3-(((trifluoromethyl)sulfonyl)oxy)benzo[b]iodol-1-ium trifluoromethanesulfonate (2f):**

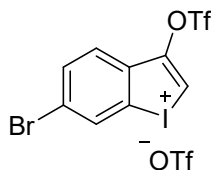

**2f** (47 mg, 39% yield, brown solid) was synthesized according to the procedure for **2a**. <sup>1</sup>H NMR (400 MHz, DMSO) δ 8.84 (s, 1H), 8.47 (d, *J* = 1.7 Hz, 1H), 8.16 (dd, *J* = 8.4, 1.8 Hz, 1H), 7.79 (d, *J* = 8.4 Hz, 1H) ppm. <sup>13</sup>C NMR (100 MHz, DMSO) δ 149.2, 134.2, 133.9, 132.6, 127.9, 124.8, 121.5, 120.7 (q, *J* = 262 Hz), 110.6 ppm. <sup>19</sup>F NMR (376 MHz, DMSO) δ -71.8, -72.4, -77.8 ppm. HRMS (ESI) for:  $C_9H_4BrF_3IO_3S$  [M-TfO]<sup>+</sup> Calculated: 454.80558, found: 454.80585.

**4-fluoro-3-(((trifluoromethyl)sulfonyl)oxy)benzo[b]iodol-1-ium trifluoromethanesulfonate (2g):**

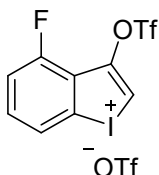

**2g** (57 mg, 52% yield, light yellow solid) was synthesized according to the procedure for **2a**. <sup>1</sup>H NMR (400 MHz, DMSO) δ 8.90 (s, 1H), 8.28 – 8.19 (m, 1H), 7.89 – 7.77 (m, 2H) ppm. <sup>13</sup>C NMR (100 MHz, DMSO) δ 159.5 (d, *J* = 258 Hz), 147.8, 133.1 (d, *J* = 8.8 Hz), 127.0 (d, *J* = 2.5 Hz), 123.2 (d, *J* = 12.6 Hz), 122.0, 121.5, 118.1 (q, *J* = 320 Hz), 111.4 ppm. <sup>19</sup>F NMR (376 MHz, DMSO) δ -72.8, -72.8, -77.8, -115.2, -115.2, -115.3 ppm. HRMS (ESI) for :  $C_9H_4F_4IO_3S$  [M-TfO]<sup>+</sup> Calculated: 394.88565, found:

394.88541.

**3-(((trifluoromethyl)sulfonyl)oxy)naphtho[1,2-b]iodol-1-ium trifluoromethanesulfonate (2h):**

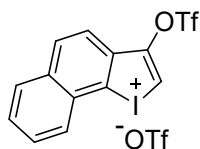

**2h** (83 mg, 72% yield, brown solid) was synthesized according to the procedure for **2a**. <sup>1</sup>H NMR (400 MHz, DMSO)  $\delta$  9.16 (s, 1H), 8.60 – 8.54 (m, 1H), 8.49 (d,  $J$  = 8.6 Hz, 1H), 8.27 (dd,  $J$  = 6.6, 2.6 Hz, 1H), 7.91 (ddd,  $J$  = 6.6, 5.4, 3.5 Hz, 2H), 7.84 (d,  $J$  = 8.6 Hz, 1H) ppm. <sup>13</sup>C NMR (100 MHz, DMSO)  $\delta$  150.5, 134.3, 133.7, 132.1, 130.6, 129.9, 129.7, 129.3, 126.6, 125.0, 122.3, 122.0, 120.7 (q,  $J$  = 256 Hz), 119.4, 116.9, 109.6 ppm. <sup>19</sup>F NMR (376 MHz, DMSO)  $\delta$  -72.3, -77.7 ppm. HRMS (ESI) for: C<sub>13</sub>H<sub>7</sub>F<sub>3</sub>IO<sub>3</sub>S [M-TfO]<sup>+</sup> Calculated:426.91072, found: 426.91104.

**General one-pot procedure for the synthesis of *ortho*-iodo aromatic acetylenes**

**GP 1: General procedure for the synthesis of *ortho*-iodo aromatic acetylenes 3a-3c from cyclic monoaryliodonium salts 2a-2c:**

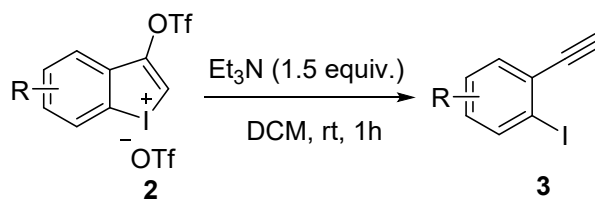

To a stirred solution of **2a** (54 mg, 0.1 mmol) in DCM (2 mL) was added Et<sub>3</sub>N (20.8  $\mu$ L, 0.15 mmol) and the solution was stirred for 2h at r.t. before DCM was removed by rotary evaporation. The residue was purified by column chromatography on a silica gel (PE) to provide product **3a** (22.7 mg, 94% yield) as a light yellow oil.

**GP 2: General procedure for the synthesis of *ortho*-iodo aromatic acetylenes 3 from iodoethynylarenes 1:**

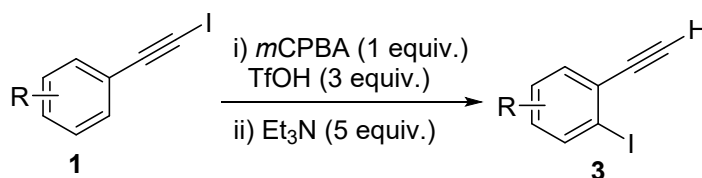

To a stirred solution of **1a** (48 mg, 0.2 mmol) in DCM (2 mL) was added TfOH (52.5  $\mu$ L, 0.6 mmol) at rt, then a solution of *m*-CPBA (85%, 40.7 mg, 0.2 mmol) in DCM (2 mL) was added dropwise, rt. The solution was stirred for 2h at r.t. before DCM was removed by rotary evaporation. Next, to the residue

was added DCM (2 mL) and Et<sub>3</sub>N (139.3 μL, 1 mmol), the solution was stirred for 2h at r.t. before DCM was removed by rotary evaporation. The residue was purified by column chromatography on a silica gel (PE) to provide product **3a** (33 mg, 68% yield) as a light yellow oil.

**1-ethynyl-2-iodo-4-methylbenzene (3a):**

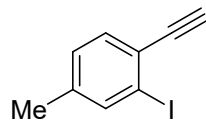

<sup>1</sup>H NMR (400 MHz, CDCl<sub>3</sub>) δ 7.69 (s, 1H), 7.38 (d, *J* = 7.9 Hz, 1H), 7.11 (d, *J* = 7.8 Hz, 1H), 3.33 (s, 1H), 2.31 (s, 3H) ppm. <sup>13</sup>C NMR (100 MHz, CDCl<sub>3</sub>) δ 140.7, 139.5, 133.2, 128.9, 125.9, 100.5, 85.4, 80.3, 21.1 ppm. HRMS (EI) for C<sub>9</sub>H<sub>7</sub>I [M]<sup>+</sup> Calculated: 241.9587, found: 241.9586.

**1-ethynyl-2-iodobenzene (3b):**

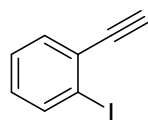

**3b** (21.3 mg, 93% yield, colorless oil) was synthesized according to **GP 1** and **3b** (24 mg, 53% yield, colorless oil) was synthesized according to **GP 2**. <sup>1</sup>H NMR (400 MHz, CDCl<sub>3</sub>) δ 7.88 – 7.82 (m, 1H), 7.51 (dd, *J* = 7.7, 1.6 Hz, 1H), 7.34 – 7.28 (m, 1H), 7.04 (td, *J* = 7.8, 1.6 Hz, 1H), 3.39 (s, 1H) ppm. <sup>13</sup>C NMR (100 MHz, CDCl<sub>3</sub>) δ 138.9, 133.6, 130.1, 128.8, 127.9, 100.6, 85.3, 77.5, 77.2, 76.8 ppm. HRMS (EI) for C<sub>8</sub>H<sub>5</sub>I [M]<sup>+</sup> Calculated: 227.9430, found: 227.9424.

**4-(tert-butyl)-1-ethynyl-2-iodobenzene (3c):**

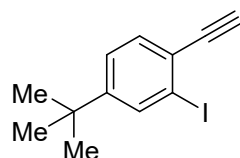

**3c** (27.6 mg, 97% yield, light yellow oil) was synthesized according to **GP 1** and **3c** (34 mg, 60% yield, light yellow oil) was synthesized according to **GP 2**. <sup>1</sup>H NMR (400 MHz, CDCl<sub>3</sub>) δ 7.84 (d, *J* = 1.9 Hz, 1H), 7.42 (d, *J* = 8.2 Hz, 1H), 7.32 (dd, *J* = 8.2, 1.9 Hz, 1H), 3.33 (s, 1H), 1.29 (s, 9H) ppm. <sup>13</sup>C NMR (100 MHz, CDCl<sub>3</sub>) δ 153.9, 136.0, 133.1, 125.9, 125.3, 100.8, 85.4, 80.3, 34.9, 31.1 ppm. HRMS (EI) for C<sub>12</sub>H<sub>13</sub>I [M]<sup>+</sup> Calculated: 284.0056, found: 284.0050.

**1-ethynyl-4-fluoro-2-iodobenzene (3d):**

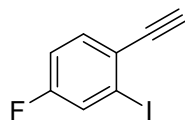

**3d** (24.7 mg, 50% yield, light yellow crystal) was synthesized according to **GP 2**. <sup>1</sup>H NMR (400 MHz,



CDCl<sub>3</sub>)  $\delta$  7.57 (dd,  $J$  = 8.0, 2.6 Hz, 1H), 7.47 (dd,  $J$  = 8.6, 5.8 Hz, 1H), 7.08 – 6.98 (m, 1H), 3.35 (d,  $J$  = 0.5 Hz, 1H) ppm. <sup>13</sup>C NMR (100 MHz, CDCl<sub>3</sub>)  $\delta$  161.8 (d,  $J$  = 256 Hz), 134.5 (d,  $J$  = 8.8 Hz), 126.2 (d,  $J$  = 24 Hz), 125.3 (d,  $J$  = 3.8 Hz), 115.6 (d,  $J$  = 21.4 Hz), 100.5 (d,  $J$  = 7.6 Hz), 84.3, 80.9 ppm. <sup>19</sup>F NMR (376 MHz, CDCl<sub>3</sub>)  $\delta$  -108.7 ppm. HRMS (EI) for C<sub>8</sub>H<sub>4</sub>FI [M]<sup>+</sup> Calculated: 245.9336, found: 245.9329.

**4-chloro-1-ethynyl-2-iodobenzene (3e):**

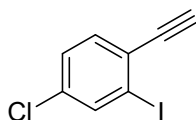

**3e** (25 mg, 48% yield, yellow solid) was synthesized according to **GP 2**. <sup>1</sup>H NMR (400 MHz, CDCl<sub>3</sub>)  $\delta$  7.85 (d,  $J$  = 1.8 Hz, 1H), 7.41 (d,  $J$  = 8.3 Hz, 1H), 7.29 (dd,  $J$  = 8.3, 1.9 Hz, 1H), 3.42 (s, 1H). <sup>13</sup>C NMR (100 MHz, CDCl<sub>3</sub>)  $\delta$  138.5, 135.2, 133.9, 128.4, 127.5, 100.7, 84.4, 82.1, 82.1 ppm. HRMS (EI) for C<sub>8</sub>H<sub>4</sub>ClI [M]<sup>+</sup> Calculated: 261.9041, found: 261.9034.

**4-bromo-1-ethynyl-2-iodobenzene (3f):**

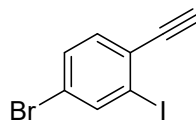

**3f** (19 mg, 31% yield, yellow solid) was synthesized according to **GP 2**. <sup>1</sup>H NMR (400 MHz, CDCl<sub>3</sub>)  $\delta$  8.01 (d,  $J$  = 1.5 Hz, 1H), 7.44 (dd,  $J$  = 8.3, 1.5 Hz, 1H), 7.34 (d,  $J$  = 8.3 Hz, 1H), 3.43 (s, 1H). <sup>13</sup>C NMR (100 MHz, CDCl<sub>3</sub>)  $\delta$  141.1, 134.2, 131.3, 127.9, 123.2, 101.1, 84.4, 82.2 ppm. HRMS (EI) for C<sub>8</sub>H<sub>4</sub>BrI [M]<sup>+</sup> Calculated: 305.8536, found: 305.8531.

**2-ethynyl-1-iodo-3-methylbenzene (3g):**

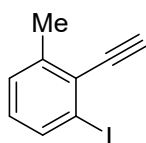

**3g** (29 mg, 59% yield, yellow oil) was synthesized according to **GP 2**. <sup>1</sup>H NMR (400 MHz, CDCl<sub>3</sub>)  $\delta$  7.69 (d,  $J$  = 8.0 Hz, 1H), 7.18 (d,  $J$  = 7.6 Hz, 1H), 6.93 (t,  $J$  = 7.8 Hz, 1H), 3.62 (s, 1H), 2.50 (s, 3H) ppm. <sup>13</sup>C NMR (100 MHz, CDCl<sub>3</sub>)  $\delta$  143.0, 137.3, 136.3, 130.5, 130.4, 129.8, 129.1, 128.5, 101.3, 85.4, 84.3, 22.3 ppm. HRMS (EI) for C<sub>9</sub>H<sub>7</sub>I [M]<sup>+</sup> Calculated: 241.9587, found: 241.9581.

**2-ethynyl-1-fluoro-3-iodobenzene (3h):**

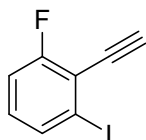

**3h** (22 mg, 45% yield, yellow solid) was synthesized according to **GP 2**.  $^1\text{H}$  NMR (400 MHz,  $\text{CDCl}_3$ )  $\delta$  7.65 (d,  $J = 7.7$  Hz, 1H), 7.13 – 7.00 (m, 2H), 3.64 (s, 1H) ppm.  $^{13}\text{C}$  NMR (100 MHz,  $\text{CDCl}_3$ )  $\delta$  163.3 (d,  $J = 322$  Hz), 134.6 (d,  $J = 3.8$  Hz), 131.1 (q,  $J = 5$  Hz), 118.1 (d,  $J = 21.4$  Hz), 115.3 (d,  $J = 26.5$  Hz), 101.3, 86.7 (d,  $J = 5$  Hz), 86.6 (d,  $J = 6$  Hz), 79.0 (d,  $J = 3.8$  Hz) ppm.  $^{19}\text{F}$  NMR (376 MHz,  $\text{CDCl}_3$ )  $\delta$  -103.6 ppm. HRMS (EI) for  $\text{C}_8\text{H}_4\text{FI}$   $[\text{M}]^+$  Calculated: 245.9336, found: 245.9333.

**1-chloro-2-ethynyl-3-iodobenzene (3i):**

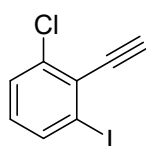

**3i** (27 mg, 51% yield, yellow solid) was synthesized according to **GP 2**.  $^1\text{H}$  NMR (400 MHz,  $\text{CDCl}_3$ )  $\delta$  7.77 (dd,  $J = 8.0, 1.0$  Hz, 1H), 7.40 (dd,  $J = 8.1, 1.1$  Hz, 1H), 6.96 (t,  $J = 8.0$  Hz, 1H), 3.69 (s, 1H) ppm.  $^{13}\text{C}$  NMR (100 MHz,  $\text{CDCl}_3$ )  $\delta$  137.3, 136.8, 130.5, 129.1, 128.3, 101.6, 86.5, 82.6 ppm. HRMS (EI) for  $\text{C}_8\text{H}_4\text{ClI}$   $[\text{M}]^+$  Calculated: 261.9041, found: 261.9037.

**1-bromo-2-ethynyl-3-iodobenzene (3j):**

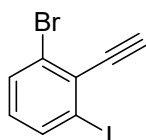

**3j** (21 mg, 34% yield, yellow solid) was synthesized according to **GP 2**.  $^1\text{H}$  NMR (400 MHz,  $\text{CDCl}_3$ )  $\delta$  7.81 (dd,  $J = 8.0, 1.1$  Hz, 1H), 7.58 (dd,  $J = 8.1, 1.1$  Hz, 1H), 6.87 (t,  $J = 8.0$  Hz, 1H), 3.68 (s, 1H) ppm.  $^{13}\text{C}$  NMR (100 MHz,  $\text{CDCl}_3$ )  $\delta$  137.9, 132.3, 130.7, 130.1, 125.7, 101.4, 85.9, 84.4 ppm. HRMS (EI) for  $\text{C}_8\text{H}_4\text{BrI}$   $[\text{M}]^+$  Calculated: 305.8536, found: 305.8535.

**2-ethynyl-1-iodonaphthalene (3k):**

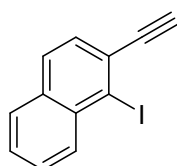

**3k** (36 mg, 65% yield, yellow oil) was synthesized according to **GP 2**.  $^1\text{H}$  NMR (400 MHz,  $\text{CDCl}_3$ )  $\delta$  8.20 (d,  $J = 8.5$  Hz, 1H), 7.79 – 7.73 (m, 2H), 7.59 (t,  $J = 7.2$  Hz, 1H), 7.53 (dd,  $J = 7.9, 4.5$  Hz, 2H),

3.54 (s, 1H) ppm.  $^{13}\text{C}$  NMR (100 MHz,  $\text{CDCl}_3$ )  $\delta$  133.6, 129.3, 128.8, 128.5, 128.5, 127.5, 82.0 ppm.  
HRMS (EI) for  $\text{C}_{12}\text{H}_7\text{I}$   $[\text{M}]^+$  Calculated: 277.9587, found: 277.9586.

**1-ethynyl-2-iodo-4-(trifluoromethyl)benzene (3l):**

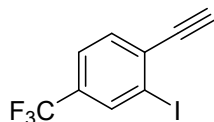

**3l** (27 mg, 45% yield, yellow solid) was synthesized according to **GP 2**.  $^1\text{H}$  NMR (400 MHz,  $\text{CDCl}_3$ )  $\delta$  8.10 (s, 1H), 7.58 (q,  $J = 8.3$  Hz, 2H), 3.52 (s, 1H) ppm.  $^{13}\text{C}$  NMR (100 MHz,  $\text{CDCl}_3$ )  $\delta$  135.7 (q,  $J = 3.8$  Hz), 133.6, 132.7, 131.7 (q,  $J = 32.8$  Hz), 124.8 (d,  $J = 3.8$  Hz), 122.7 (q,  $J = 273$  Hz), 100.4, 84.2, 83.7 ppm.  $^{19}\text{F}$  NMR (376 MHz,  $\text{CDCl}_3$ )  $\delta$  -63.0 ppm. HRMS (EI) for  $\text{C}_9\text{H}_4\text{F}_3\text{I}$   $[\text{M}]^+$  Calculated: 295.9304, found: 295.9303.

**4-ethynyl-3-iodobenzonitrile (3m):**

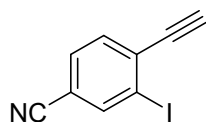

**3m** (21 mg, 42% yield, yellow oil) was synthesized according to **GP 2**.  $^1\text{H}$  NMR (400 MHz,  $\text{CDCl}_3$ )  $\delta$  8.13 (d,  $J = 1.2$  Hz, 1H), 7.63 – 7.53 (m, 2H), 3.63 (s, 1H) ppm.  $^{13}\text{C}$  NMR (100 MHz,  $\text{CDCl}_3$ )  $\delta$  141.9, 141.9, 133.7, 133.5, 131.2, 116.7, 113.5, 100.4, 85.6, 85.5, 84.1, 84.0 ppm. HRMS (EI) for  $\text{C}_9\text{H}_4\text{IN}$   $[\text{M}]^+$  Calculated: 252.9383, found: 252.9380.

**methyl 4-ethynyl-3-iodobenzoate (3n):**

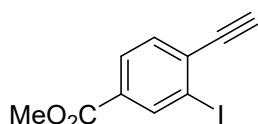

**3n** (28 mg, 49% yield, yellow solid) was synthesized according to **GP 2**.  $^1\text{H}$  NMR (400 MHz,  $\text{CDCl}_3$ )  $\delta$  8.50 (d,  $J = 1.6$  Hz, 1H), 7.96 (dd,  $J = 8.1, 1.6$  Hz, 1H), 7.55 (d,  $J = 8.1$  Hz, 1H), 3.92 (s, 3H), 3.55 (s, 1H) ppm.  $^{13}\text{C}$  NMR (100 MHz,  $\text{CDCl}_3$ )  $\delta$  165.1, 139.8, 133.3, 133.2, 131.3, 128.8, 100.1, 84.7, 84.0, 52.7 ppm. HRMS (EI) for  $\text{C}_{10}\text{H}_7\text{IO}_2$   $[\text{M}]^+$  Calculated: 285.9485, found: 285.9484.

**GP 3: General procedure for the synthesis of 1, 3-diynes 4 from iodoethynylarenes 1:**

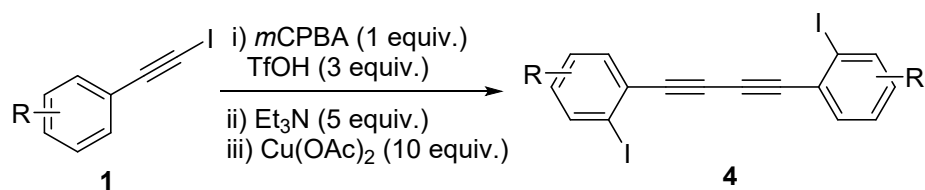

To a stirred solution of **1a** (48 mg, 0.2 mmol) in DCM (2 mL) was added TfOH (52.5  $\mu\text{L}$ , 0.6 mmol) at rt, then a solution of *m*-CPBA (85%, 40.7 mg, 0.2 mmol) in DCM (2 mL) was added dropwise, rt. The solution was stirred for 2h at r.t. before DCM was removed by rotary evaporation. Next, to the residue was added DCM (2 mL) and Et<sub>3</sub>N (139.3  $\mu\text{L}$ , 1 mmol), the solution was stirred for 2h at r.t. before DCM was removed by rotary evaporation. Then, to residue was added Cu(OAc)<sub>2</sub> (181.6 mg, 1 mmol), MeOH (2 mL), pyridine (2 mL), the solution was stirred for 24h at r.t. before the reaction mixture was concentrated by rotary evaporation. The residue was purified by column chromatography on a silica gel (PE) to provide product **4a** (25 mg, 52% yield) as a light yellow solid.

**1,4-bis(2-iodo-4-methylphenyl)buta-1,3-diyne (4a):**

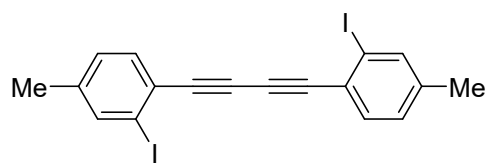

<sup>1</sup>H NMR (400 MHz, CDCl<sub>3</sub>)  $\delta$  7.70 (s, 2H), 7.42 (d, *J* = 7.9 Hz, 2H), 7.12 (d, *J* = 7.9 Hz, 2H), 2.32 (s, 6H) ppm. <sup>13</sup>C NMR (100 MHz, CDCl<sub>3</sub>)  $\delta$  141.2, 139.6, 133.8, 129.0, 125.7, 101.0, 84.3, 76.8, 21.2 ppm. HRMS (EI) for C<sub>18</sub>H<sub>12</sub>I<sub>2</sub> [M]<sup>+</sup> Calculated: 481.9023, found: 481.9029.

**1,4-bis(2-iodophenyl)buta-1,3-diyne (4b):**

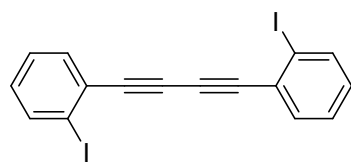

**4b** (22 mg, 47% yield, yellow oil) was synthesized according to **GP 3**. <sup>1</sup>H NMR (400 MHz, CDCl<sub>3</sub>)  $\delta$  7.87 (dd, *J* = 8.0, 0.9 Hz, 2H), 7.56 (dd, *J* = 7.8, 1.6 Hz, 2H), 7.33 (td, *J* = 7.6, 1.1 Hz, 2H), 7.06 (td, *J* = 7.8, 1.6 Hz, 2H). <sup>13</sup>C NMR (100 MHz, CDCl<sub>3</sub>)  $\delta$  139.0, 134.1, 130.5, 128.7, 128.0, 101.0, 84.5 ppm. HRMS (EI) for C<sub>16</sub>H<sub>8</sub>I<sub>2</sub> [M]<sup>+</sup> Calculated: 453.8710, found: 453.8712.

**1,4-bis(4-fluoro-2-iodophenyl)buta-1,3-diyne (4c):**

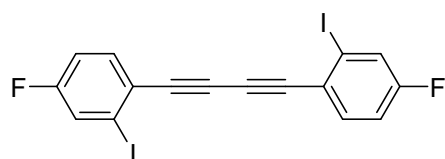

**4c** (23.4 mg, 48% yield, yellow solid) was synthesized according to **GP 3**.  $^1\text{H}$  NMR (400 MHz,  $\text{CDCl}_3$ )  $\delta$  7.60 (d,  $J = 2.5$  Hz, 1H), 7.58 (d,  $J = 2.5$  Hz, 1H), 7.52 (dd,  $J = 8.7, 5.7$  Hz, 2H), 7.10 – 7.03 (m, 2H) ppm.  $^{13}\text{C}$  NMR (100 MHz,  $\text{CDCl}_3$ )  $\delta$  162.0 (d,  $J = 257$  Hz), 135.2 (d,  $J = 8.8$  Hz), 126.5 (d,  $J = 23.9$  Hz), 125.0, 115.8 (d,  $J = 21.4$  Hz), 101.2, 83.4 ppm.  $^{19}\text{F}$  NMR (376 MHz,  $\text{CDCl}_3$ )  $\delta$  -107.1 ppm. HRMS (EI) for  $\text{C}_{16}\text{H}_6\text{F}_2\text{I}_2$   $[\text{M}]^+$  Calculated: 489.8521, found: 489.8525.

**1,4-bis(4-chloro-2-iodophenyl)buta-1,3-diyne (4d):**

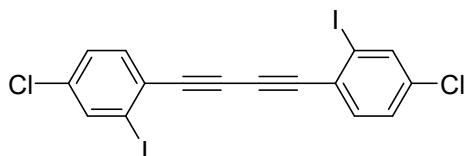

**4d** (22.7 mg, 43% yield, yellow solid) was synthesized according to **GP 3**.  $^1\text{H}$  NMR (400 MHz,  $\text{CDCl}_3$ )  $\delta$  7.86 (d,  $J = 2.0$  Hz, 2H), 7.46 (d,  $J = 8.4$  Hz, 2H), 7.32 (dd,  $J = 8.4, 2.0$  Hz, 2H) ppm.  $^{13}\text{C}$  NMR (100 MHz,  $\text{CDCl}_3$ )  $\delta$  138.6, 135.8, 134.5, 128.6, 127.1, 101.1, 84.0, 78.0 ppm. HRMS (ESI) for  $\text{C}_{16}\text{H}_7\text{Cl}_2\text{I}_2$   $[\text{M}+\text{H}]^+$  Calculated: 522.80087, found: 522.80933.

**1,4-bis(4-bromo-2-iodophenyl)buta-1,3-diyne (4e):**

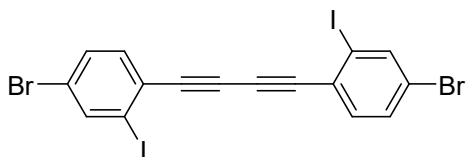

**4e** (15.2 mg, 25% yield, yellow solid) was synthesized according to **GP 3**.  $^1\text{H}$  NMR (400 MHz,  $\text{CDCl}_3$ )  $\delta$  8.02 (d,  $J = 1.8$  Hz, 2H), 7.47 (dd,  $J = 8.3, 1.9$  Hz, 2H), 7.39 (d,  $J = 8.3$  Hz, 2H).  $^{13}\text{C}$  NMR (100 MHz,  $\text{CDCl}_3$ )  $\delta$  141.3, 134.7, 131.4, 127.5, 124.0, 101.4, 84.1, 78.1 ppm.

**1,4-bis(2-fluoro-6-iodophenyl)buta-1,3-diyne (4f):**

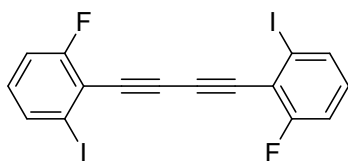

**4f** (19.5 mg, 40% yield, yellow solid) was synthesized according to **GP 3**.  $^1\text{H}$  NMR (400 MHz,  $\text{CDCl}_3$ )  $\delta$  7.60 (d,  $J = 2.5$  Hz, 1H), 7.58 (d,  $J = 2.5$  Hz, 1H), 7.52 (dd,  $J = 8.7, 5.7$  Hz, 2H), 7.10 – 7.03 (m, 2H) ppm.  $^{13}\text{C}$  NMR (100 MHz,  $\text{CDCl}_3$ )  $\delta$  162.0 (d,  $J = 257$  Hz), 135.2 (d,  $J = 8.8$  Hz), 126.4 (d,  $J = 23.9$  Hz), 125.1 (d,  $J = 3.8$  Hz), 115.8 (d,  $J = 21.4$  Hz), 101.1 (d,  $J = 8.8$  Hz), 83.4 ppm.  $^{19}\text{F}$  NMR (376 MHz,  $\text{CDCl}_3$ )  $\delta$  -107.1, -107.1, -107.1, -107.2 ppm. HRMS (EI) for  $\text{C}_{16}\text{H}_6\text{F}_2\text{I}_2$   $[\text{M}]^+$  Calculated: 489.8521, found: 489.8523.

**1,4-bis(2-chloro-6-iodophenyl)buta-1,3-diyne (4g):**

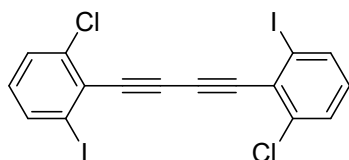

**4g** (24.4 mg, 47% yield, yellow solid) was synthesized according to **GP 3**.  $^1\text{H NMR}$  (400 MHz,  $\text{CDCl}_3$ )  $\delta$  7.77 (dd,  $J = 8.0, 0.9$  Hz, 2H), 7.42 (dd,  $J = 8.1, 1.0$  Hz, 2H), 6.98 (t,  $J = 8.0$  Hz, 2H) ppm.  $^{13}\text{C NMR}$  (100 MHz,  $\text{CDCl}_3$ )  $\delta$  137.7, 137.4, 130.8, 129.2, 128.2, 102.0, 83.2 ppm. HRMS (EI) for  $\text{C}_{16}\text{H}_6\text{Cl}_2\text{I}_2$   $[\text{M}]^+$  Calculated: 521.7930, found: 521.7930.

**1,4-bis(2-iodo-4-(trifluoromethyl)phenyl)buta-1,3-diyne (4h):**

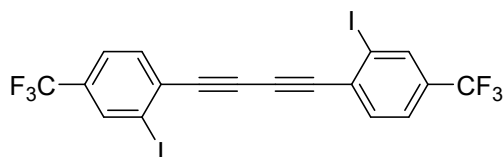

**4h** (24 mg, 41% yield, yellow solid) was synthesized according to **GP 3**.  $^1\text{H NMR}$  (400 MHz,  $\text{CDCl}_3$ )  $\delta$  8.11 (s, 2H), 7.62 (dd,  $J = 20.0, 8.2$  Hz, 4H) ppm.  $^{13}\text{C NMR}$  (100 MHz,  $\text{CDCl}_3$ )  $\delta$  135.8 (q,  $J = 3.8$  Hz), 134.1, 132.1, 125.0 (q,  $J = 3.8$  Hz), 122.6 (q,  $J = 273$  Hz), 100.8, 84.3, 79.0 ppm.  $^{19}\text{F NMR}$  (376 MHz,  $\text{CDCl}_3$ )  $\delta$  -63.1 ppm. HRMS (EI) for  $\text{C}_{18}\text{H}_6\text{F}_6\text{I}_2$   $[\text{M}]^+$  Calculated: 589.8458, found: 589.8473.

**dimethyl 4,4'-(buta-1,3-diyne-1,4-diyl)bis(3-iodobenzoate) (4i):**

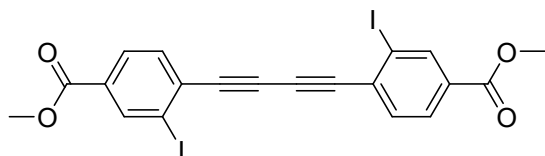

**4i** (24.5 mg, 43% yield, yellow solid) was synthesized according to **GP 3**.  $^1\text{H NMR}$  (400 MHz,  $\text{CDCl}_3$ )  $\delta$  8.52 (s, 2H), 8.06 – 7.92 (m, 2H), 7.61 (d,  $J = 8.1$  Hz, 2H), 3.93 (s, 6H) ppm.  $^{13}\text{C NMR}$  (100 MHz,  $\text{CDCl}_3$ )  $\delta$  165.0, 139.9, 133.8, 132.7, 131.6, 128.9, 100.5, 85.1, 79.6, 52.8 ppm.

**Synthetic applications**

**Synthesis of tribenzohexadehydro[12]annulene 5 from 3b:**

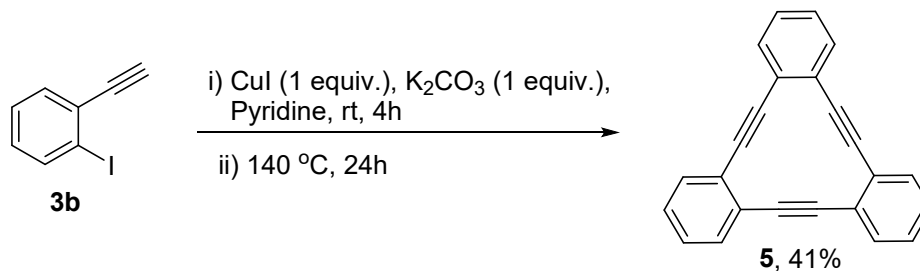

To a stirred solution of **3b** (90 mg, 0.39 mmol) in pyridine (3 mL) was added CuI (75.2 mg, 0.39 mmol),  $\text{K}_2\text{CO}_3$  (54.6 mg, 0.39 mmol), the solution was stirred for 4h at r.t. Then, the solution was

stirred for 24h at 140 °C in a sealed tube before the reaction mixture was concentrated by rotary evaporation. The residue was purified by column chromatography on a silica gel (PE) to provide product **5** (16 mg, 41% yield) as a white solid. <sup>1</sup>H NMR (400 MHz, CDCl<sub>3</sub>) δ 7.34 (dd, *J* = 5.6, 3.4 Hz, 6H), 7.18 (dd, *J* = 5.7, 3.4 Hz, 6H) ppm. <sup>13</sup>C NMR (100 MHz, CDCl<sub>3</sub>) δ 132.1, 128.7, 126.8, 93.0 ppm. Data are identical with reported work. <sup>[1]</sup>

### Synthesis of ladder-type $\pi$ -conjugated PAH **8** from **4b**

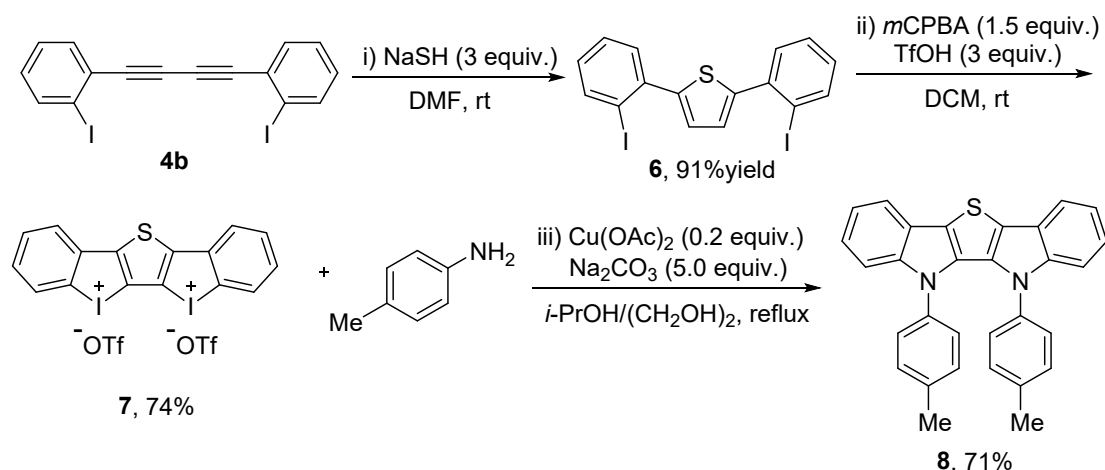

#### i) synthesis of 2,5-bis(2-iodophenyl)thiophene (**6**):

To **4b** (455 mg, 1 mol) in a flask was added NaSH (168.5 mg, 3 mol), DMF (5 mL). The reaction mixture was stirred at rt for 24h. The remained mixture was extracted with EtOAc, the combined organic layers were washed with H<sub>2</sub>O and brine and dried over anhydrous Na<sub>2</sub>SO<sub>4</sub>, evaporated in vacuum. The residue was purified by column chromatography on a silica gel (PE/EtOAc = 100/1-50/1) to provide products **6** (445 mg, 91% yield) as a yellow oil.

#### ii) synthesis of bis-iodonium salt (**7**):

To a stirred solution of **6** (440 mg, 0.9 mmol) in DCM (10 mL) was added *m*-CPBA (85%, 275 mg, 1.35 mmol), TfOH (0.24 mL, 2.7 mmol) at 0 °C, and 30 mins later, the solution was stirred for 1h at r.t. before DCM was removed by rotary evaporation. tert-butyl methyl ether (10 mL) was added to the remained solid. The mixture was stirred for 30 min, and then filtered. The obtained solid was washed

with tert-butyl methyl ether three times, dried in high vacuo to provide **7** (523 mg, 94% yield) as a brown solid. <sup>1</sup>H NMR (400 MHz, DMSO) δ 8.45 – 8.28 (m, 4H), 7.93 (t, *J* = 7.5 Hz, 2H), 7.77 – 7.71 (m, 2H) ppm. <sup>13</sup>C NMR (100 MHz, DMSO) δ 148.2, 136.0, 131.4, 131.1, 130.9, 126.7, 126.2, 111.1 ppm. <sup>19</sup>F NMR (376 MHz, DMSO) δ -77.7 ppm. HRMS (ESI) for: C<sub>17</sub>H<sub>8</sub>F<sub>3</sub>I<sub>2</sub>O<sub>3</sub>S<sub>2</sub> [M-TfO]<sup>+</sup> Calculated: 634.79508, found: 634.79492. Data are identical with reported work. [2]

### iii) synthesis of 5,6-di-p-tolyl-5,6-dihydrothieno[3,2-b:4,5-b']diindole (**8**):

Performed according to reported work [3]: to **7** (157 mg, 0.2 mmol) in a flask was added Na<sub>2</sub>CO<sub>3</sub> (106 mg, 5 equiv.), Cu(OAc)<sub>2</sub> (7.3 mg, 0.2 equiv.), p-toluidine (150 mg, 1.4 mmol). The reaction flask was degassed and recharged with Ar three times, and then a solution of *i*-PrOH (3.6 mL) and ethylene glycol (0.4 mL) was added via a syringe. The reaction mixture was stirred at reflux heated by an oil bath under Ar atmosphere for 16h. The remained mixture was extracted with EtOAc, the combined organic layers were washed with H<sub>2</sub>O and brine and dried over anhydrous Na<sub>2</sub>SO<sub>4</sub>, evaporated in vacuum. The residue was purified by column chromatography on a silica gel (PE/EtOAc = 50/1-10/1) to provide products **8** (63 mg, 71% yield) as a white crystal. <sup>1</sup>H NMR (400 MHz, CDCl<sub>3</sub>) δ 7.84 (d, *J* = 7.5 Hz, 2H), 7.35 – 7.19 (m, 6H), 7.05 (d, *J* = 7.9 Hz, 4H), 6.90 (d, *J* = 7.9 Hz, 4H), 2.38 (s, 6H) ppm. <sup>13</sup>C NMR (100 MHz, CDCl<sub>3</sub>) δ 142.5, 136.8, 136.5, 130.5, 129.6, 126.8, 123.3, 122.9, 121.3, 120.6, 118.3, 111.5, 21.3 ppm. HRMS (ESI) for C<sub>30</sub>H<sub>23</sub>N<sub>2</sub>S [M+H]<sup>+</sup> Calculated: 443.15765, found: 443.15793.

### Synthesis of (iodoethynyl)benzene Derivatives **1**

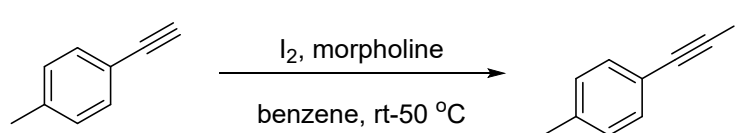

Performed according to reported work [4]: Iodine (7.21 g, 28.41 mmol) and morpholine (6.75 g, 6.78 mL, 77.48 mmol) were dissolved in benzene (30 ml) and the solution was stirred at room temperature for 30 min. 1-Ethynyl-4-methylbenzene (3 g, 25.83 mmol) in benzene (30 ml) was added dropwise and the mixture was stirred at 50 °C for 24 h. The suspension was filtered and the residue was washed with Et<sub>2</sub>O (2 x 30 mL). The combined organic layers were washed with saturated aqueous solutions of NH<sub>4</sub>Cl (2 x 30 mL) and NaHCO<sub>3</sub> (2 x 30 mL) and H<sub>2</sub>O (2 x 30 mL). The organic layer was dried over MgSO<sub>4</sub> and filtered. The solvent was removed under reduced pressure and the crude product was purified by silica column chromatography (petroleum ether as eluent) to afford 1-(iodoethynyl)-4-methylbenzene **1a** (5.89 g, 94%) as light yellow oil.



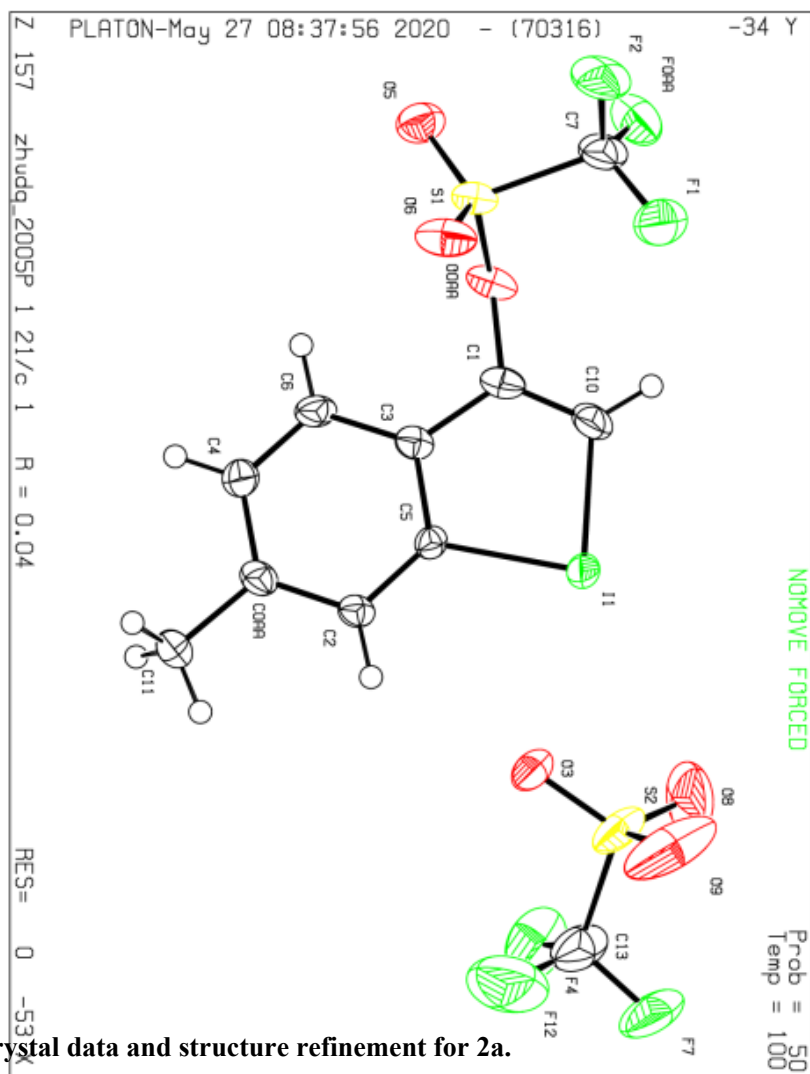

**Table S2 Crystal data and structure refinement for 2a.**

|                                    |                                                                              |
|------------------------------------|------------------------------------------------------------------------------|
| Identification code                | 2a                                                                           |
| Empirical formula                  | C <sub>11</sub> H <sub>7</sub> F <sub>6</sub> IO <sub>6</sub> S <sub>2</sub> |
| Formula weight                     | 540.19                                                                       |
| Temperature/K                      | 100.01(14)                                                                   |
| Crystal system                     | monoclinic                                                                   |
| Space group                        | P2 <sub>1</sub> /c                                                           |
| a/Å                                | 14.7333(2)                                                                   |
| b/Å                                | 5.45270(10)                                                                  |
| c/Å                                | 21.8703(3)                                                                   |
| α/°                                | 90                                                                           |
| β/°                                | 109.658(2)                                                                   |
| γ/°                                | 90                                                                           |
| Volume/Å <sup>3</sup>              | 1654.58(5)                                                                   |
| Z                                  | 4                                                                            |
| ρ <sub>calc</sub> /cm <sup>3</sup> | 2.169                                                                        |
| μ/mm <sup>-1</sup>                 | 18.481                                                                       |
| F(000)                             | 1040.0                                                                       |

|                                                  |                                                                      |
|--------------------------------------------------|----------------------------------------------------------------------|
| Crystal size/mm <sup>3</sup>                     | 0.2 × 0.05 × 0.05                                                    |
| Radiation                                        | CuK $\alpha$ ( $\lambda$ = 1.54184)                                  |
| 2 $\Theta$ range for data collection/ $^{\circ}$ | 6.37 to 153.108                                                      |
| Index ranges                                     | -17 $\leq$ h $\leq$ 18, -6 $\leq$ k $\leq$ 6, -27 $\leq$ l $\leq$ 24 |
| Reflections collected                            | 31465                                                                |
| Independent reflections                          | 3396 [ $R_{\text{int}}$ = 0.0559, $R_{\text{sigma}}$ = 0.0215]       |
| Data/restraints/parameters                       | 3396/0/236                                                           |
| Goodness-of-fit on F <sup>2</sup>                | 1.116                                                                |
| Final R indexes [ $I \geq 2\sigma(I)$ ]          | $R_1$ = 0.0448, $wR_2$ = 0.1188                                      |
| Final R indexes [all data]                       | $R_1$ = 0.0452, $wR_2$ = 0.1191                                      |
| Largest diff. peak/hole / e $\text{\AA}^{-3}$    | 2.12/-2.00                                                           |

**Table S3 Fractional Atomic Coordinates ( $\times 10^4$ ) and Equivalent Isotropic Displacement Parameters ( $\text{\AA}^2 \times 10^3$ ) for 2a.  $U_{\text{eq}}$  is defined as 1/3 of of the trace of the orthogonalised  $U_{ij}$  tensor.**

| Atom | x          | y         | z          | $U_{\text{eq}}$ |
|------|------------|-----------|------------|-----------------|
| I1   | 6253.1(2)  | 2883.7(6) | 4779.0(2)  | 34.41(14)       |
| S1   | 9675.9(8)  | 6681(2)   | 5918.9(6)  | 28.9(3)         |
| S2   | 3786.1(11) | 1535(3)   | 3942.2(7)  | 45.6(4)         |
| F1   | 9111(3)    | 3969(10)  | 6700.3(17) | 60.1(11)        |
| F2   | 10363(3)   | 6178(9)   | 7156.5(16) | 54.7(10)        |
| O0AA | 9180(2)    | 4707(7)   | 5381.7(16) | 31.3(8)         |
| F0AA | 10479(3)   | 2922(7)   | 6638.0(19) | 51.6(9)         |
| O5   | 10578(3)   | 7207(8)   | 5858(2)    | 39.6(9)         |
| O6   | 9022(3)    | 8521(8)   | 5943(2)    | 43.6(10)        |
| O3   | 4411(3)    | 3385(8)   | 3854(2)    | 44.2(10)        |
| F7   | 2272(3)    | -648(11)  | 3163.7(19) | 77.0(16)        |
| F4   | 3315(4)    | 375(10)   | 2720(2)    | 81.4(16)        |
| C5   | 6685(3)    | 5642(8)   | 4274(2)    | 20.5(8)         |
| C1   | 8165(3)    | 4533(10)  | 5107(2)    | 27.3(10)        |
| C2   | 6087(3)    | 6936(9)   | 3749(2)    | 22.0(9)         |
| C3   | 7670(3)    | 6065(9)   | 4554(2)    | 22.5(9)         |
| C4   | 7492(4)    | 9196(11)  | 3755(2)    | 32.6(11)        |
| C0AA | 6500(3)    | 8755(10)  | 3484(2)    | 26.5(10)        |
| C6   | 8070(3)    | 7899(10)  | 4278(2)    | 29.6(11)        |
| C7   | 9922(4)    | 4774(12)  | 6654(2)    | 38.2(12)        |
| O8   | 4268(6)    | -814(11)  | 4112(3)    | 93(2)           |
| O9   | 3271(5)    | 1925(16)  | 4351(3)    | 108(3)          |
| C10  | 7698(4)    | 2889(10)  | 5329(3)    | 39.2(13)        |
| C11  | 5880(4)    | 10279(10) | 2922(2)    | 34.0(11)        |

|     |         |          |         |        |
|-----|---------|----------|---------|--------|
| F12 | 2459(4) | 3101(14) | 2922(4) | 114(2) |
| C13 | 2931(5) | 973(18)  | 3152(3) | 60(2)  |

**Table S4 Anisotropic Displacement Parameters ( $\text{\AA}^2 \times 10^3$ ) for 2a. The Anisotropic displacement factor exponent takes the form:  $-2\pi^2[h^2a^{*2}U_{11}+2hka^*b^*U_{12}+\dots]$ .**

| Atom | $U_{11}$ | $U_{22}$ | $U_{33}$  | $U_{23}$  | $U_{13}$  | $U_{12}$   |
|------|----------|----------|-----------|-----------|-----------|------------|
| I1   | 38.3(2)  | 35.7(2)  | 21.03(19) | 4.42(11)  | -0.81(13) | -19.18(13) |
| S1   | 20.9(5)  | 36.4(6)  | 25.5(6)   | -5.5(5)   | 2.7(4)    | 1.9(4)     |
| S2   | 45.7(8)  | 60.1(9)  | 41.0(7)   | -21.3(7)  | 27.9(6)   | -30.1(7)   |
| F1   | 48(2)    | 100(3)   | 33.1(17)  | 2(2)      | 15.3(15)  | -24(2)     |
| F2   | 54(2)    | 76(3)    | 24.0(15)  | -13.2(17) | 0.0(14)   | -10(2)     |
| O0AA | 24.1(16) | 41(2)    | 23.2(16)  | -7.0(15)  | 0.1(13)   | 9.6(15)    |
| F0AA | 54(2)    | 51(2)    | 43(2)     | 8.1(16)   | 6.1(17)   | 9.7(17)    |
| O5   | 30.3(19) | 52(2)    | 37(2)     | -3.3(18)  | 11.8(16)  | -6.1(17)   |
| O6   | 29.7(18) | 44(2)    | 48(2)     | -16.4(19) | 0.2(17)   | 7.3(17)    |
| O3   | 31.6(19) | 38(2)    | 58(3)     | 10.0(19)  | 9.3(18)   | -11.2(17)  |
| F7   | 70(3)    | 114(4)   | 47(2)     | -26(2)    | 19(2)     | -63(3)     |
| F4   | 121(4)   | 96(4)    | 46(2)     | -29(2)    | 54(3)     | -42(3)     |
| C5   | 21.2(19) | 24(2)    | 18.6(19)  | -1.0(16)  | 9.1(16)   | -3.1(16)   |
| C1   | 23(2)    | 31(3)    | 23(2)     | -6.4(19)  | 0.8(17)   | 2.2(18)    |
| C2   | 21(2)    | 29(2)    | 16(2)     | -2.6(17)  | 6.5(16)   | -0.4(17)   |
| C3   | 21(2)    | 31(2)    | 17.2(19)  | -3.2(18)  | 7.6(16)   | 1.7(18)    |
| C4   | 31(2)    | 45(3)    | 22(2)     | 4(2)      | 8.6(19)   | -10(2)     |
| C0AA | 27(2)    | 34(3)    | 17(2)     | 0.0(19)   | 4.6(17)   | -1(2)      |
| C6   | 18(2)    | 50(3)    | 22(2)     | 0(2)      | 7.5(18)   | -6(2)      |
| C7   | 31(2)    | 57(4)    | 22(2)     | -4(2)     | 2.8(19)   | -5(2)      |
| O8   | 131(6)   | 42(3)    | 86(4)     | 25(3)     | 11(4)     | -17(3)     |
| O9   | 95(4)    | 180(8)   | 77(4)     | -89(5)    | 66(4)     | -92(5)     |
| C10  | 43(3)    | 30(3)    | 28(3)     | 5(2)      | -10(2)    | -8(2)      |
| C11  | 35(3)    | 33(3)    | 27(2)     | 8(2)      | 1(2)      | -3(2)      |
| F12  | 64(3)    | 112(5)   | 133(6)    | 19(4)     | -12(4)    | 13(3)      |
| C13  | 51(4)    | 93(6)    | 38(3)     | -13(4)    | 21(3)     | -32(4)     |

**Table S5 Bond Lengths for 2a.**

| Atom | Atom | Length/ $\text{\AA}$ | Atom | Atom | Length/ $\text{\AA}$ |
|------|------|----------------------|------|------|----------------------|
| I1   | C5   | 2.089(4)             | F0AA | C7   | 1.310(7)             |
| I1   | C10  | 2.063(6)             | F7   | C13  | 1.320(8)             |
| S1   | O0AA | 1.579(4)             | F4   | C13  | 1.295(8)             |
| S1   | O5   | 1.409(4)             | C5   | C2   | 1.382(6)             |
| S1   | O6   | 1.405(4)             | C5   | C3   | 1.391(6)             |

|        |     |          |      |      |           |
|--------|-----|----------|------|------|-----------|
| S1     | C7  | 1.845(6) | C1   | C3   | 1.449(7)  |
| S2     | O3  | 1.422(4) | C1   | C10  | 1.318(8)  |
| S2     | O8  | 1.451(7) | C2   | C0AA | 1.388(7)  |
| S2     | O9  | 1.369(5) | C3   | C6   | 1.396(7)  |
| S2     | C13 | 1.790(7) | C4   | C0AA | 1.400(7)  |
| F1     | C7  | 1.308(7) | C4   | C6   | 1.371(7)  |
| F2     | C7  | 1.318(7) | C0AA | C11  | 1.510(7)  |
| O0AAC1 |     | 1.414(6) | F12  | C13  | 1.359(11) |

**Table S6 Bond Angles for 2a.**

| Atom   | Atom   | Atom | Angle/°  | Atom   | Atom | Atom | Angle/°  |
|--------|--------|------|----------|--------|------|------|----------|
| C10    | I1     | C5   | 82.5(2)  | C5     | C3   | C1   | 115.5(4) |
| O0AAS1 |        | C7   | 99.8(2)  | C5     | C3   | C6   | 117.3(4) |
| O5     | S1     | O0AA | 106.5(2) | C6     | C3   | C1   | 127.3(4) |
| O5     | S1     | C7   | 106.4(3) | C6     | C4   | C0AA | 122.1(5) |
| O6     | S1     | O0AA | 111.3(2) | C2     | C0AA | C4   | 119.2(4) |
| O6     | S1     | O5   | 122.6(3) | C2     | C0AA | C11  | 120.2(4) |
| O6     | S1     | C7   | 107.8(3) | C4     | C0AA | C11  | 120.6(5) |
| O3     | S2     | O8   | 112.2(4) | C4     | C6   | C3   | 119.7(4) |
| O3     | S2     | C13  | 105.5(3) | F1     | C7   | S1   | 109.9(4) |
| O8     | S2     | C13  | 102.8(4) | F1     | C7   | F2   | 109.7(5) |
| O9     | S2     | O3   | 120.3(4) | F1     | C7   | F0AA | 109.9(6) |
| O9     | S2     | O8   | 107.5(5) | F2     | C7   | S1   | 107.3(4) |
| O9     | S2     | C13  | 107.0(4) | F0AAC7 |      | S1   | 110.6(4) |
| C1     | O0AAS1 |      | 121.3(3) | F0AAC7 |      | F2   | 109.4(5) |
| C2     | C5     | I1   | 125.7(3) | C1     | C10  | I1   | 110.5(4) |
| C2     | C5     | C3   | 124.1(4) | F7     | C13  | S2   | 112.3(5) |
| C3     | C5     | I1   | 110.2(3) | F7     | C13  | F12  | 106.9(7) |
| O0AAC1 |        | C3   | 118.6(4) | F4     | C13  | S2   | 114.2(5) |
| C10    | C1     | O0AA | 119.8(5) | F4     | C13  | F7   | 110.5(7) |
| C10    | C1     | C3   | 121.4(4) | F4     | C13  | F12  | 103.8(7) |
| C5     | C2     | C0AA | 117.7(4) | F12    | C13  | S2   | 108.5(6) |

**Table S7 Torsion Angles for 2a.**

| A  | B      | C  | D    | Angle/°   | A  | B  | C    | D   | Angle/°   |
|----|--------|----|------|-----------|----|----|------|-----|-----------|
| I1 | C5     | C2 | C0AA | 178.4(3)  | O3 | S2 | C13  | F12 | -59.3(6)  |
| I1 | C5     | C3 | C1   | 0.9(5)    | C5 | C2 | C0AA | C4  | 0.1(7)    |
| I1 | C5     | C3 | C6   | -178.8(4) | C5 | C2 | C0AA | C11 | -178.3(4) |
| S1 | O0AAC1 |    | C3   | 86.7(5)   | C5 | C3 | C6   | C4  | 0.3(7)    |

|        |        |        |           |           |         |           |           |           |
|--------|--------|--------|-----------|-----------|---------|-----------|-----------|-----------|
| S1     | O0AAC1 | C10    | -97.7(5)  | C1        | C3 C6   | C4        | -179.4(5) |           |
| O0AAS1 | C7     | F1     | -62.0(5)  | C2        | C5 C3   | C1        | 179.1(4)  |           |
| O0AAS1 | C7     | F2     | 178.8(4)  | C2        | C5 C3   | C6        | -0.7(7)   |           |
| O0AAS1 | C7     | F0AA   | 59.5(4)   | C3        | C5 C2   | C0AA      | 0.5(7)    |           |
| O0AAC1 | C3     | C5     | 174.5(4)  | C3        | C1 C10  | I1        | 0.6(7)    |           |
| O0AAC1 | C3     | C6     | -5.8(7)   | C0AA      | C4 C6   | C3        | 0.3(8)    |           |
| O0AAC1 | C10    | I1     | -174.9(3) | C6        | C4 C0AA | C2        | -0.5(8)   |           |
| O5     | S1     | O0AAC1 | -151.8(4) | C6        | C4 C0AA | C11       | 177.9(5)  |           |
| O5     | S1     | C7     | F1        | -172.6(4) | C7      | S1 O0AAC1 | 97.7(4)   |           |
| O5     | S1     | C7     | F2        | 68.2(4)   | O8      | S2 C13    | F7        | 65.2(7)   |
| O5     | S1     | C7     | F0AA      | -51.0(5)  | O8      | S2 C13    | F4        | -61.7(7)  |
| O6     | S1     | O0AAC1 | -15.8(5)  | O8        | S2 C13  | F12       | -176.9(6) |           |
| O6     | S1     | C7     | F1        | 54.2(5)   | O9      | S2 C13    | F7        | -48.0(8)  |
| O6     | S1     | C7     | F2        | -65.0(4)  | O9      | S2 C13    | F4        | -174.8(7) |
| O6     | S1     | C7     | F0AA      | 175.8(4)  | O9      | S2 C13    | F12       | 70.0(7)   |
| O3     | S2     | C13    | F7        | -177.2(6) | C10     | C1 C3     | C5        | -1.1(7)   |
| O3     | S2     | C13    | F4        | 56.0(8)   | C10     | C1 C3     | C6        | 178.6(5)  |

**Table S8 Hydrogen Atom Coordinates ( $\text{\AA} \times 10^4$ ) and Isotropic Displacement Parameters ( $\text{\AA}^2 \times 10^3$ ) for 2a.**

| Atom | x       | y        | z       | U(eq) |
|------|---------|----------|---------|-------|
| H2   | 5431.14 | 6598.75  | 3579.35 | 26    |
| H4   | 7766.81 | 10408.14 | 3574.12 | 39    |
| H6   | 8726.04 | 8238.32  | 4449.01 | 36    |
| H10  | 7980.37 | 1874.08  | 5684.2  | 47    |
| H11A | 6057.63 | 9960.44  | 2545.98 | 51    |
| H11B | 5973.51 | 11986.81 | 3032.61 | 51    |
| H11C | 5214.75 | 9859.65  | 2831.67 | 51    |

### References:

- [1] (a) Y. Li, J. Zhang, W. Wang, Q. Miao, X. She, X. Pan, Efficient synthesis of tribenzohexadecahydro[12]annulene and its derivatives in the ionic liquid, *J. Org. Chem.* **2005**, *70*,

- 3285-3287; (b) P. N. W. Baxter, A. A. Ouahabi, L. Karmazin, A. Varnek, J.-M. Strub, S. Cianferani, An investigation into the Stephens–Castro synthesis of dehydrotriaryl[12]annulenes: factors influencing the cyclotrimerization, *Eur. J. Org. Chem.* **2019**, 6783–6795.
- [2] B. Wu, N. Yoshikai, Conversion of 2-iodobiaryls into 2,2'-diiodobiaryls via oxidation-iodination sequences: a versatile route to ladder-type heterofluorenes, *Angew. Chem. Int. Ed.* **2015**, *54*, 8736-8739.
- [3] D. Zhu, Q. Liu, B. Luo, M. Chen, R. Pi, P. Huang, S. Wen, Synthesis of carbazoles via one-pot copper-catalyzed amine insertion into cyclic diphenyleneiodoniums as a strategy to generate a drug-Like chemical library, *Adv. Synth. Catal.* **2013**, *355*, 2172-2178.
- [4] Z. Xia, V. Corce, F. Zhao, C. Przybylski, A. Espagne, L. Jullien, T. L. Saux, Y. Gimbert, H. Dossmann, V. Mouries-Mansuy, C. Ollivier, L. Fensterbank, Photosensitized oxidative addition to gold(I) enables alkynylative cyclization of o-alkynylphenols with iodoalkynes, *Nat. Chem.* **2019**, *11*, 797-805.

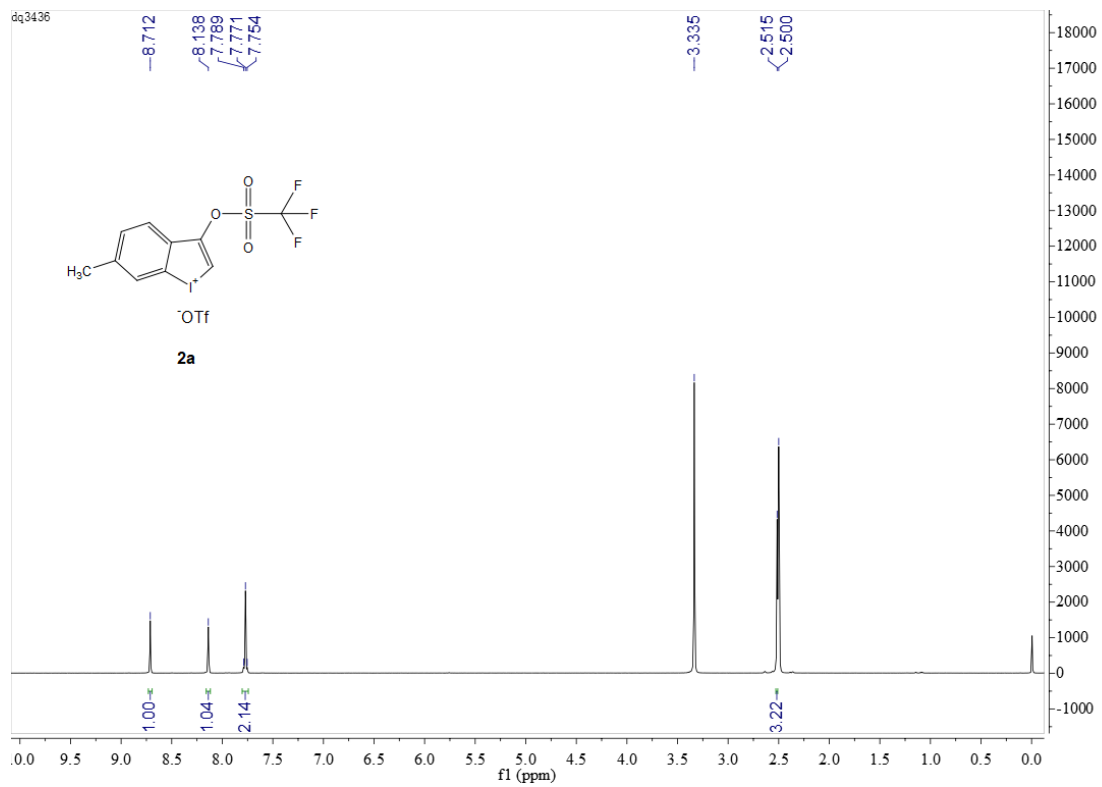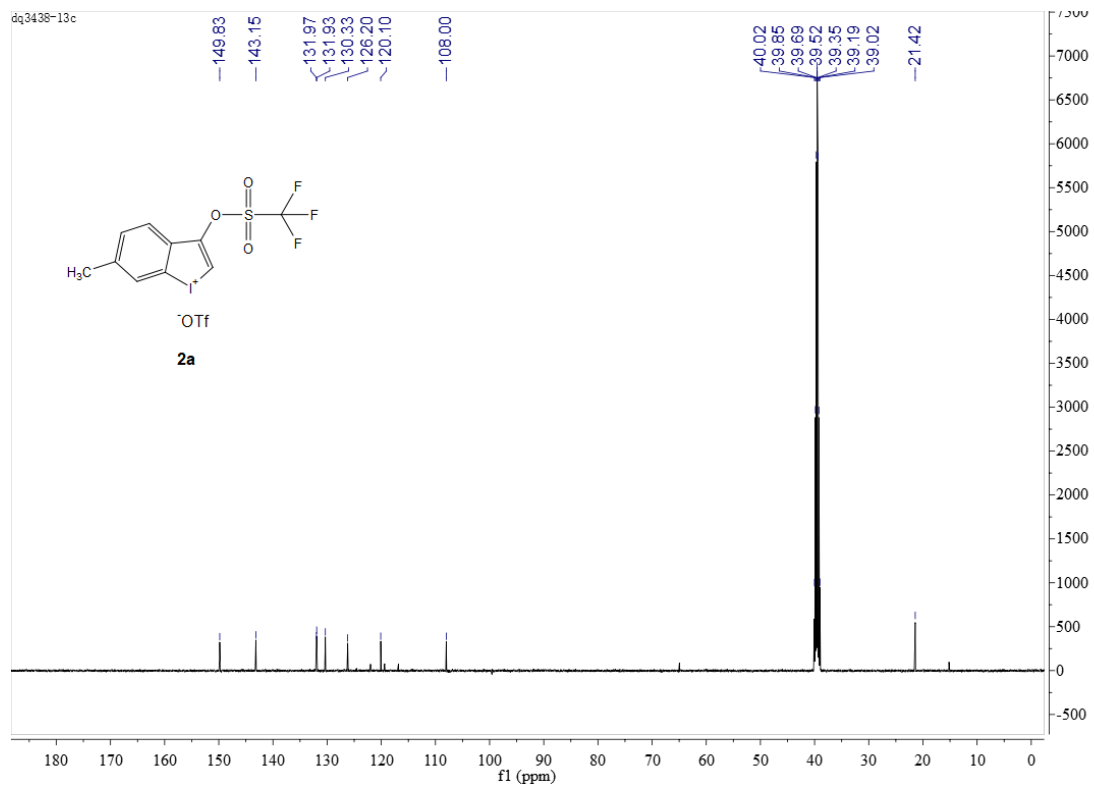

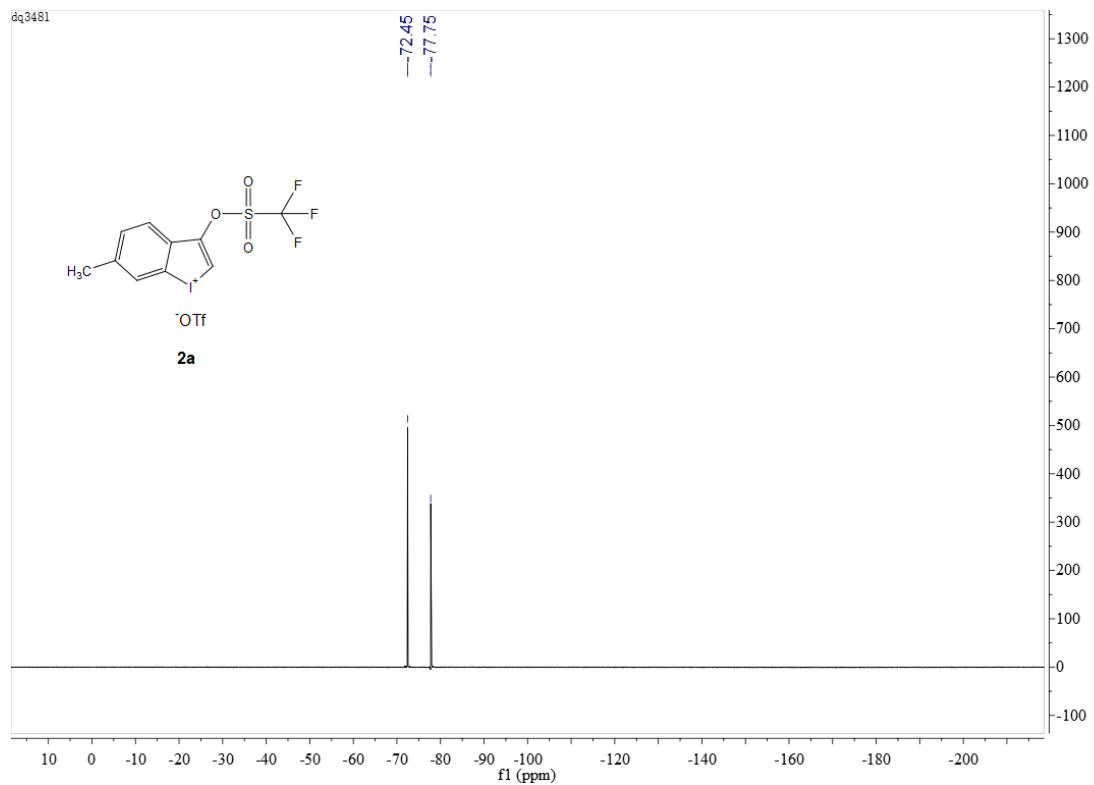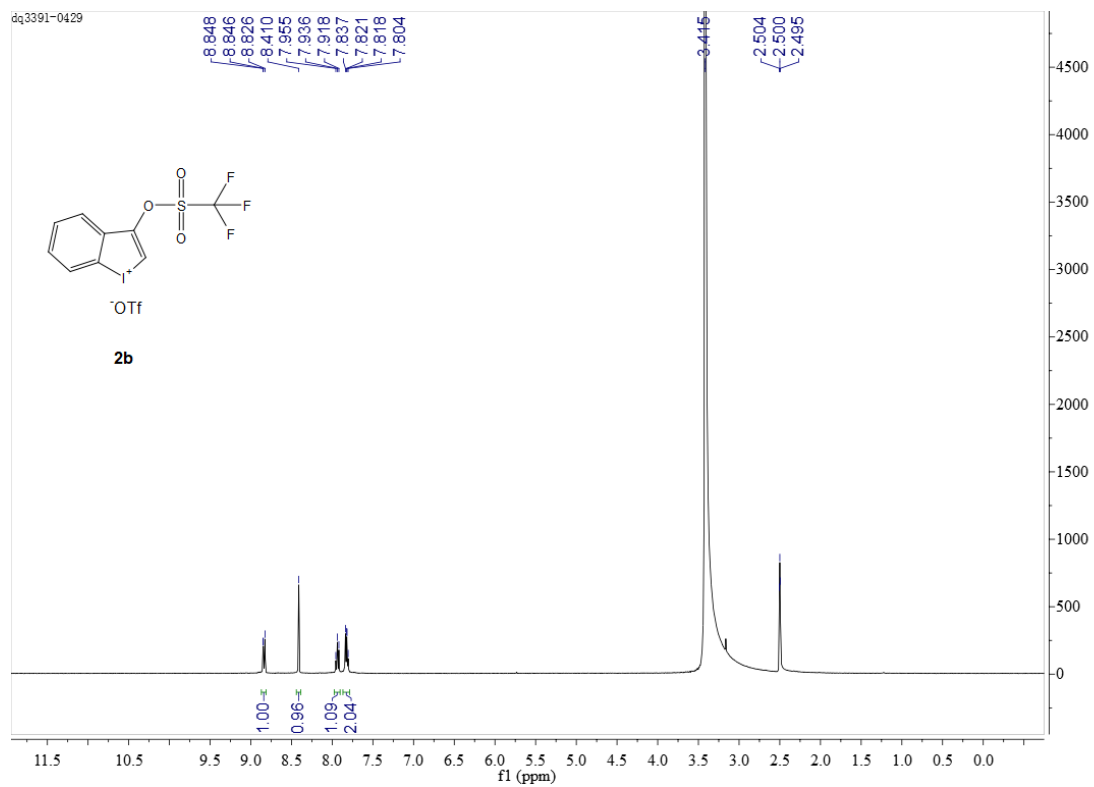



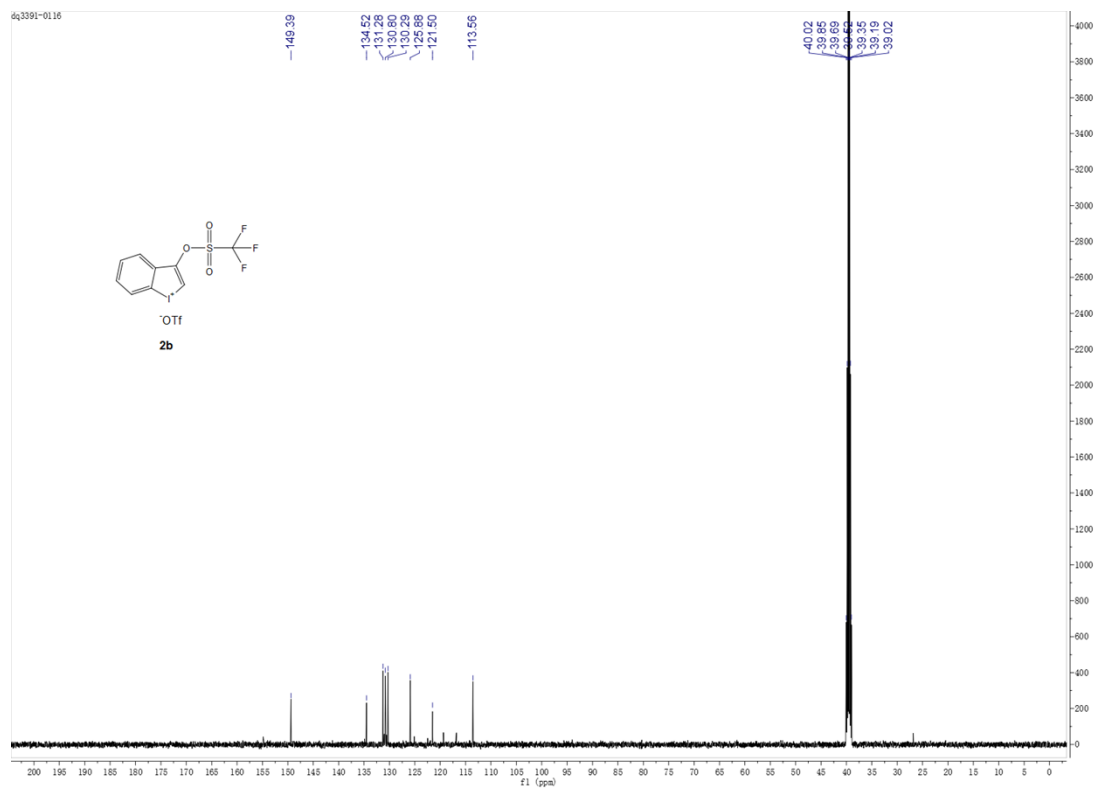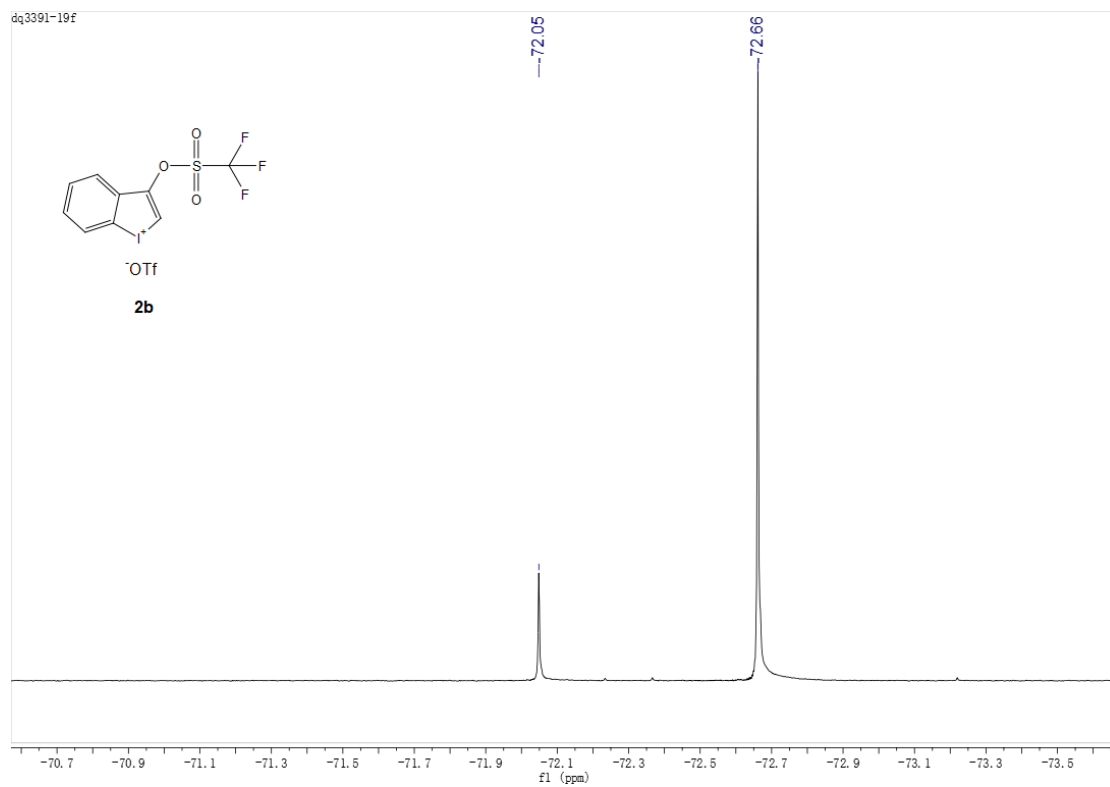

dq3550

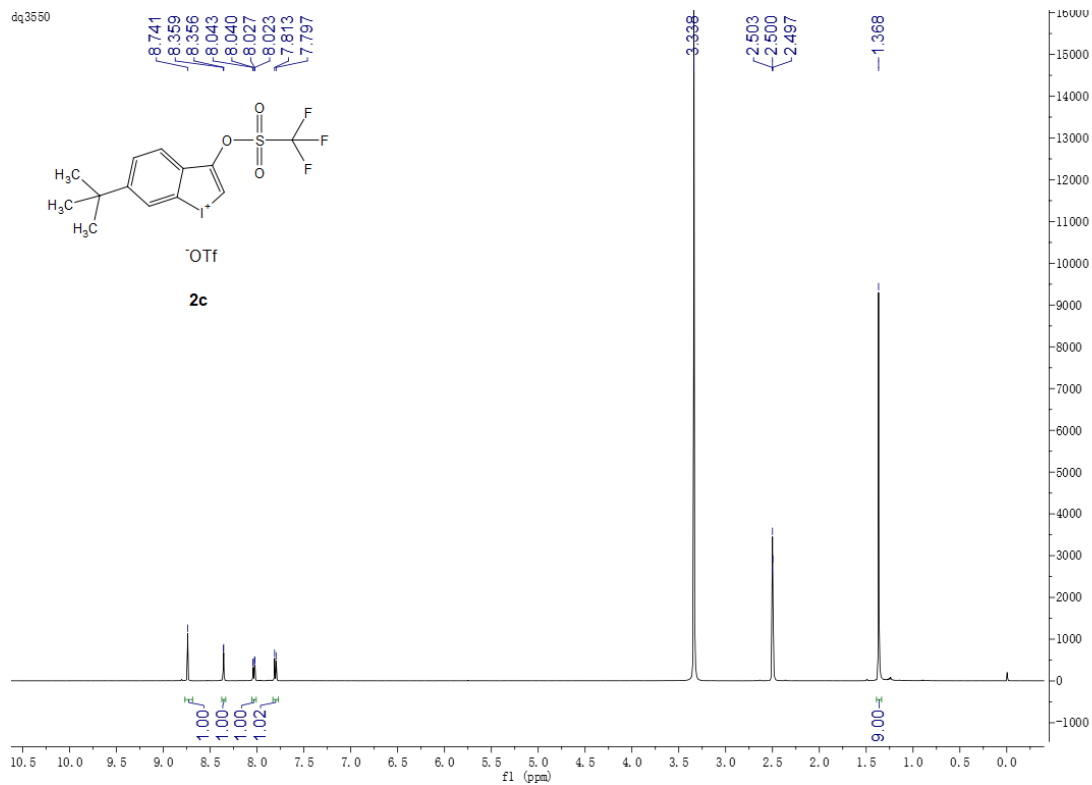

dq3550-0812

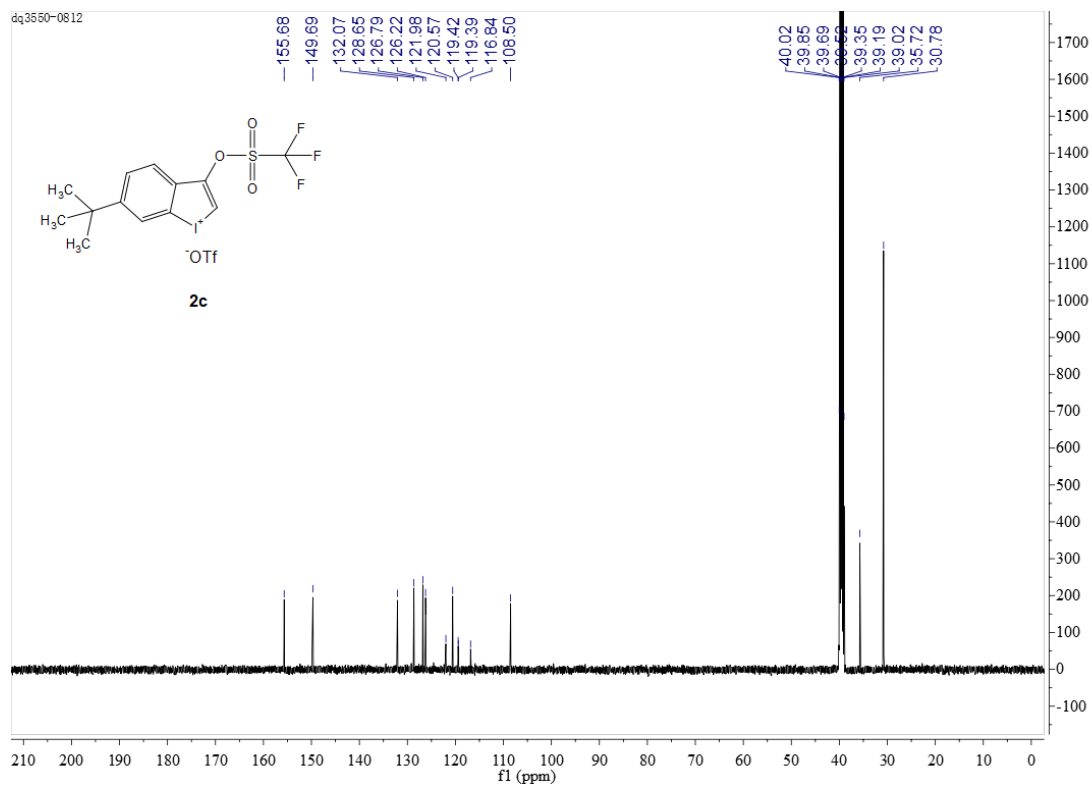

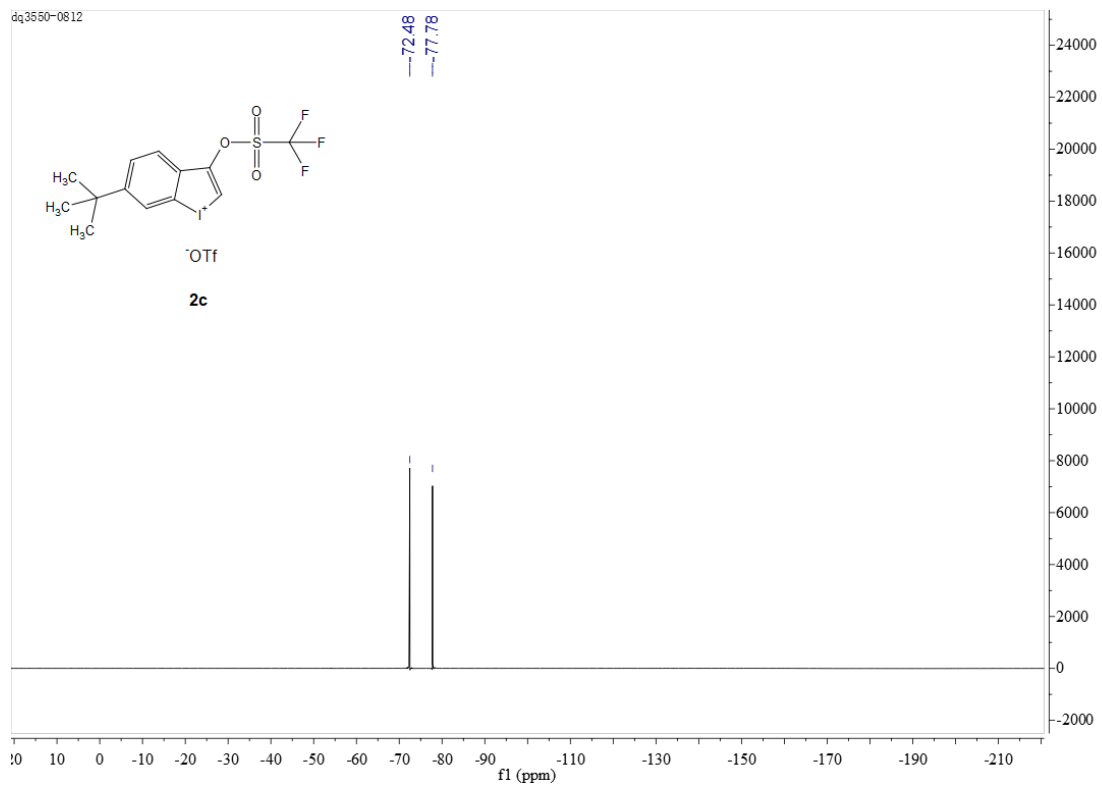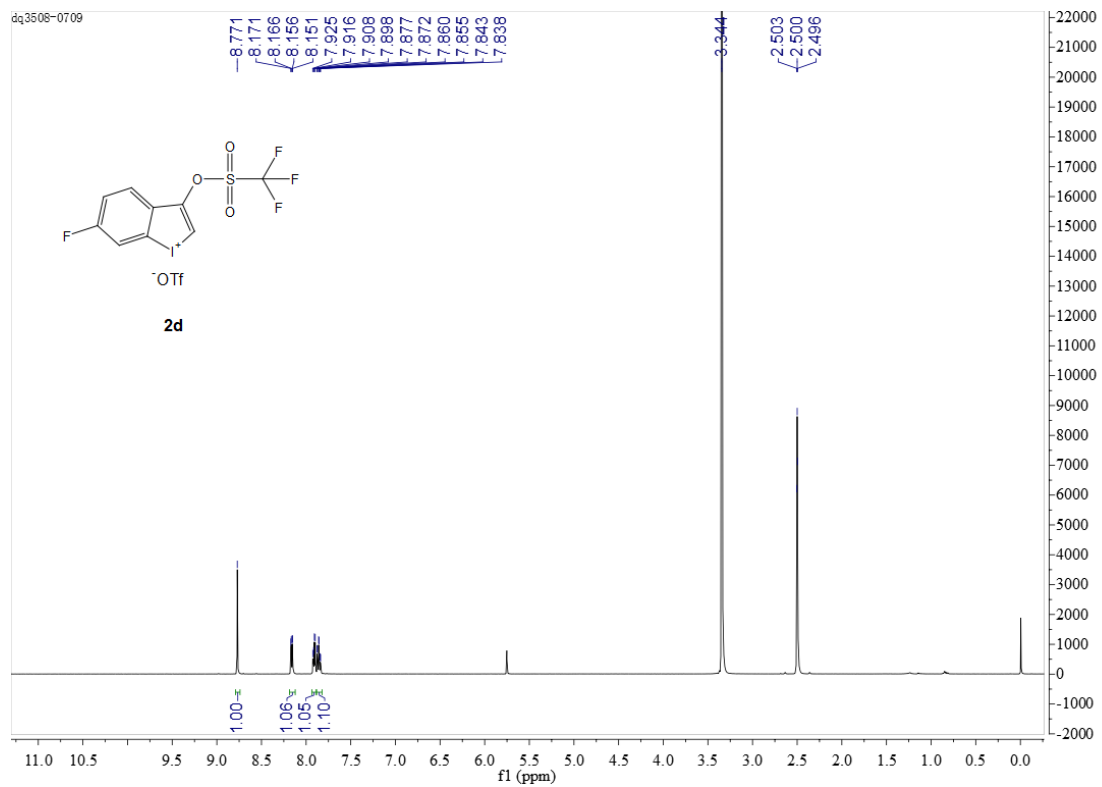

dq3508-c

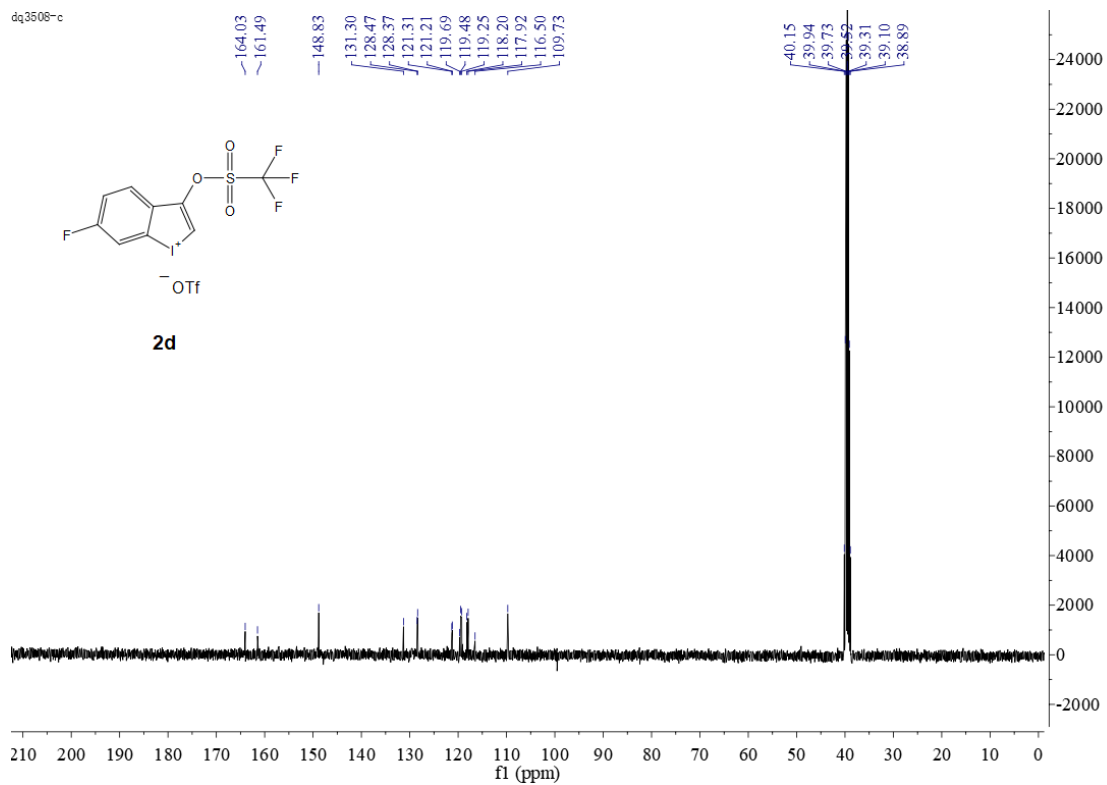

dq3508-0709

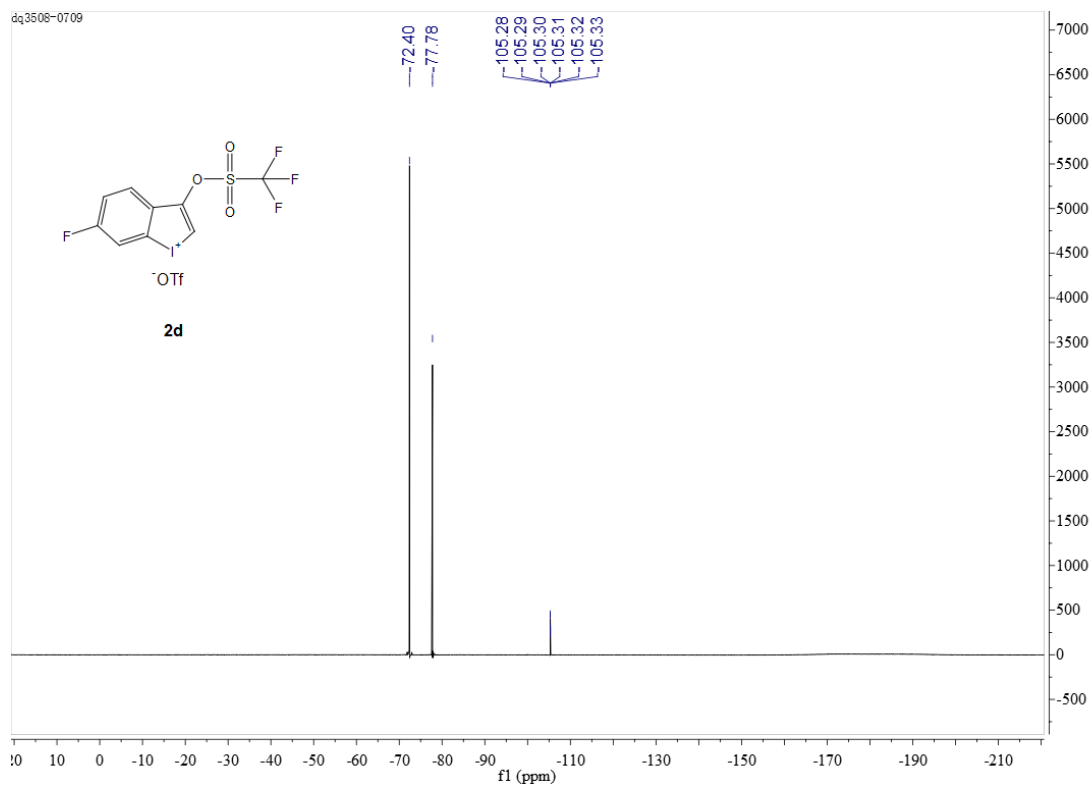

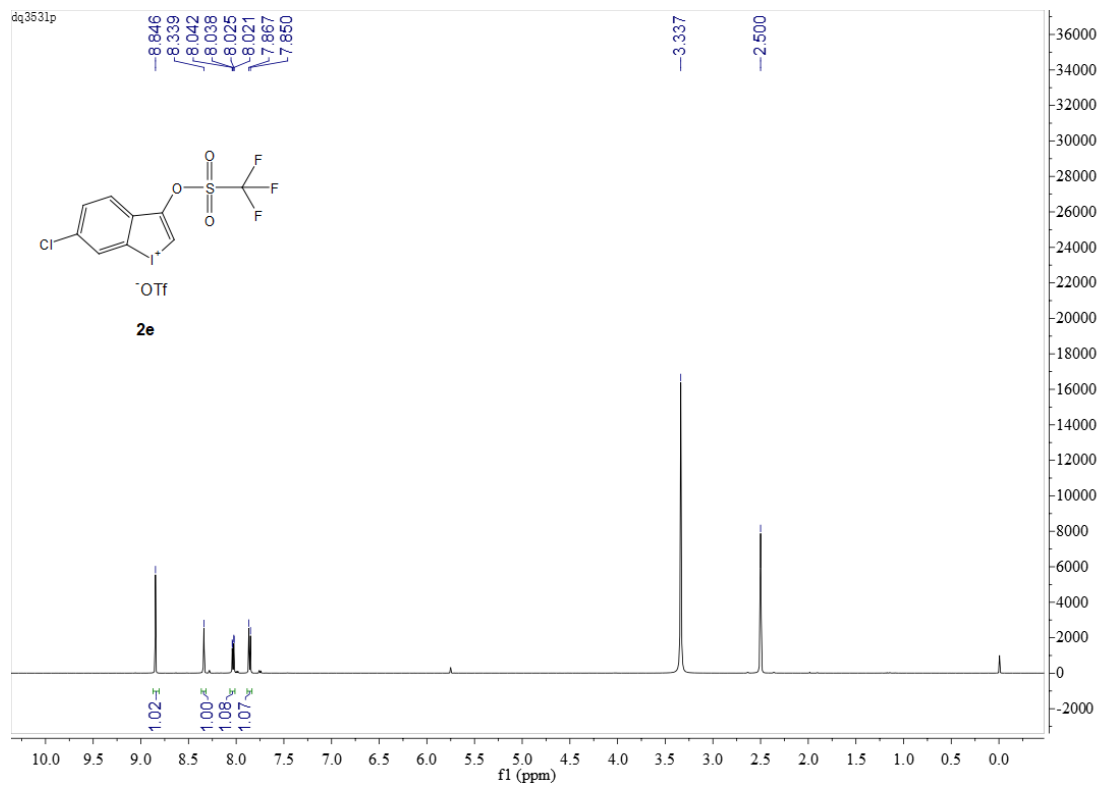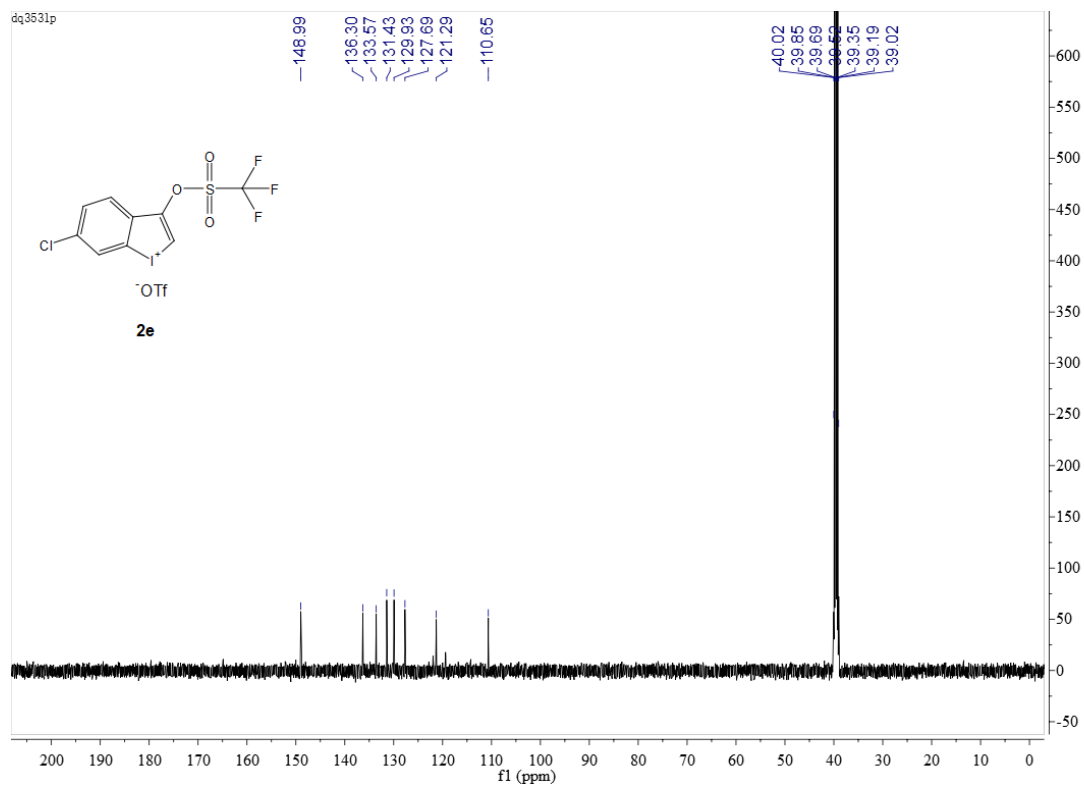

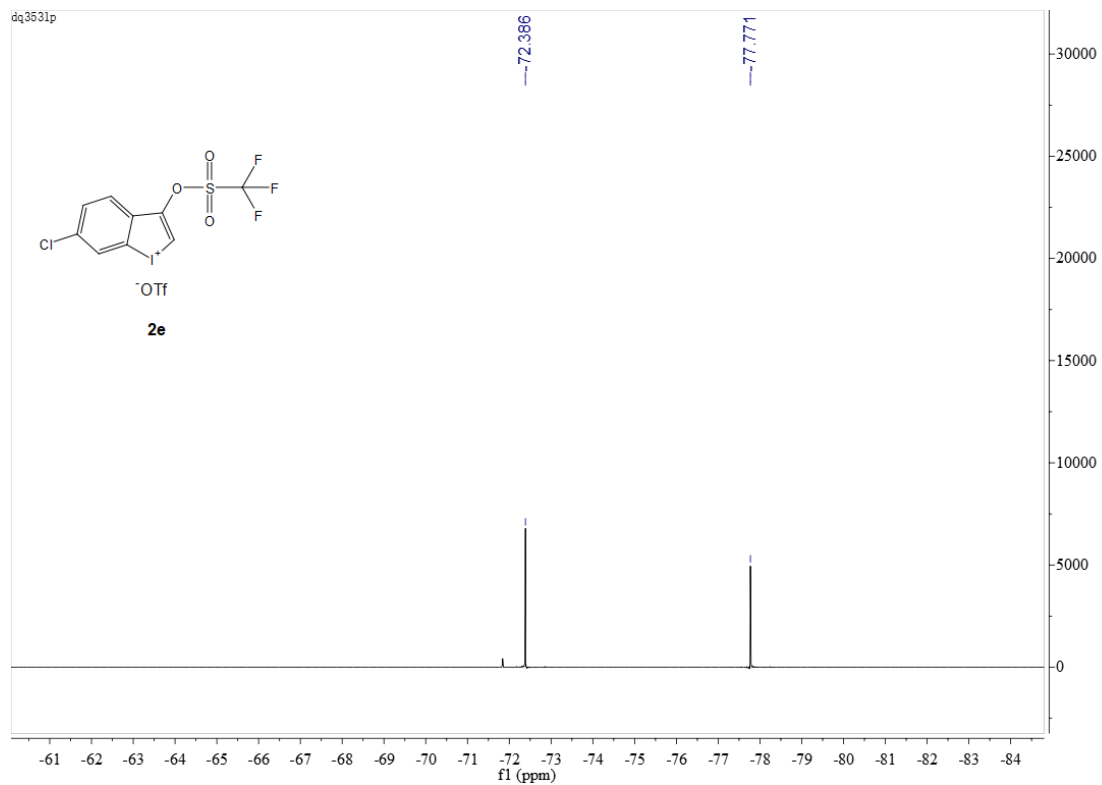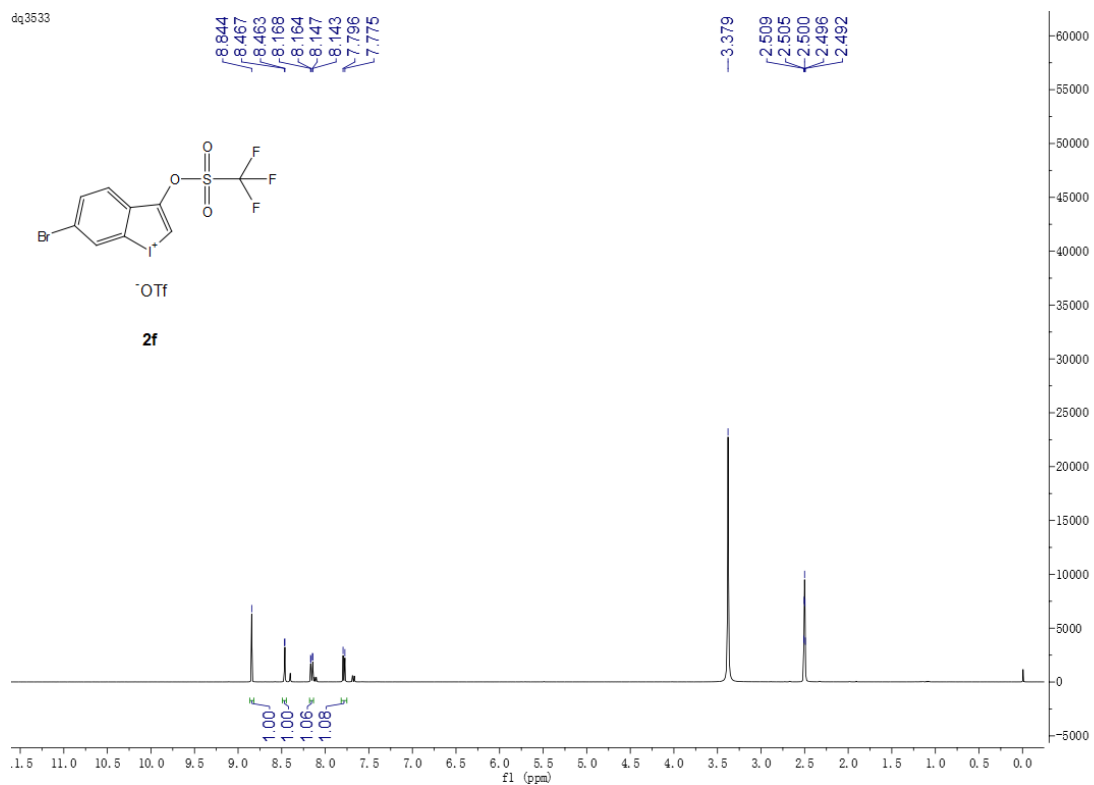

dq3533

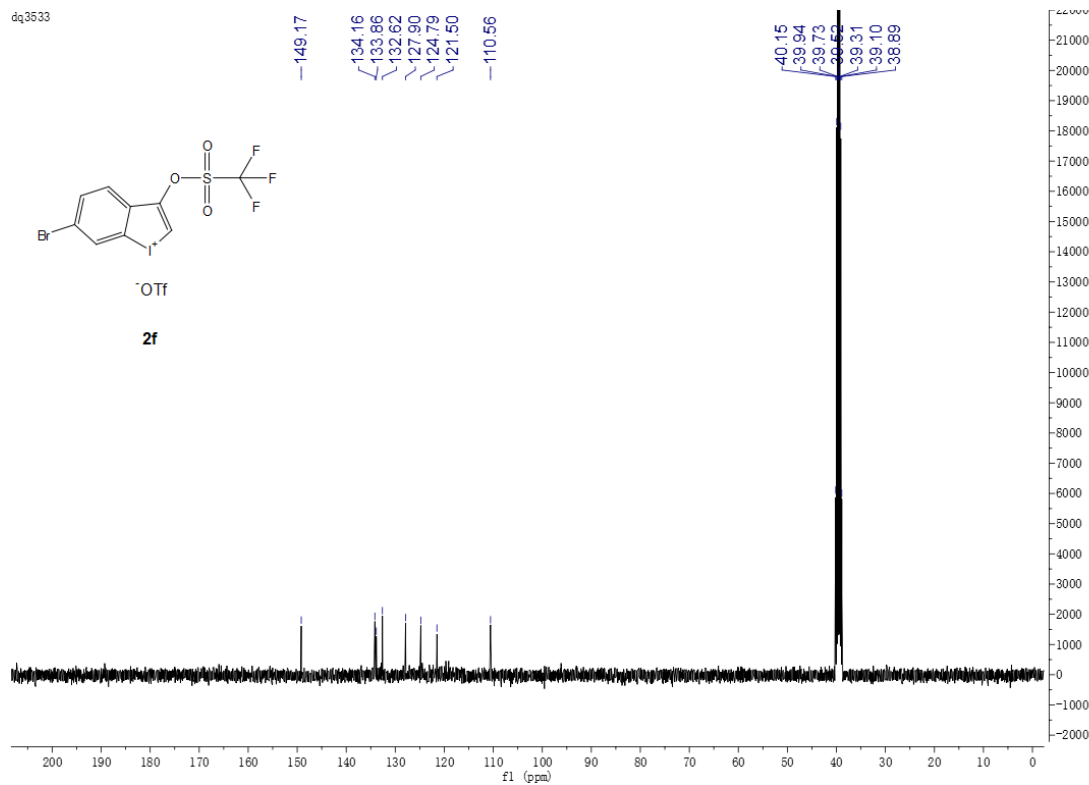

dq3533

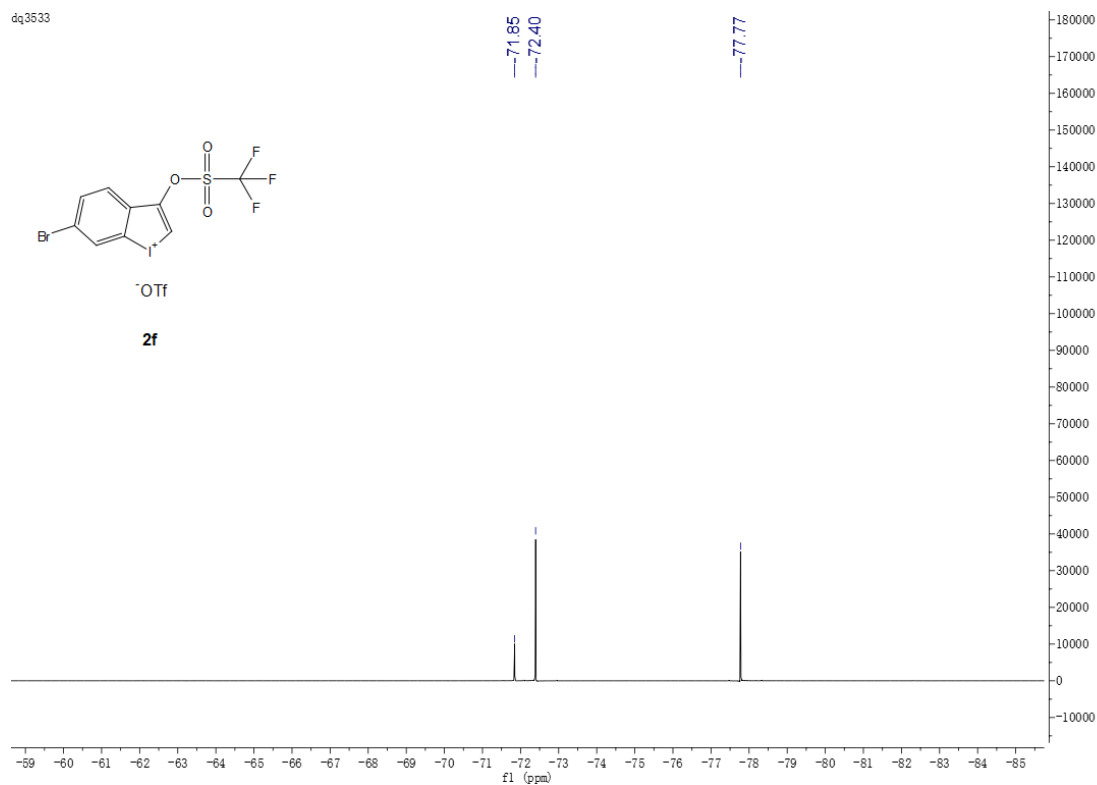

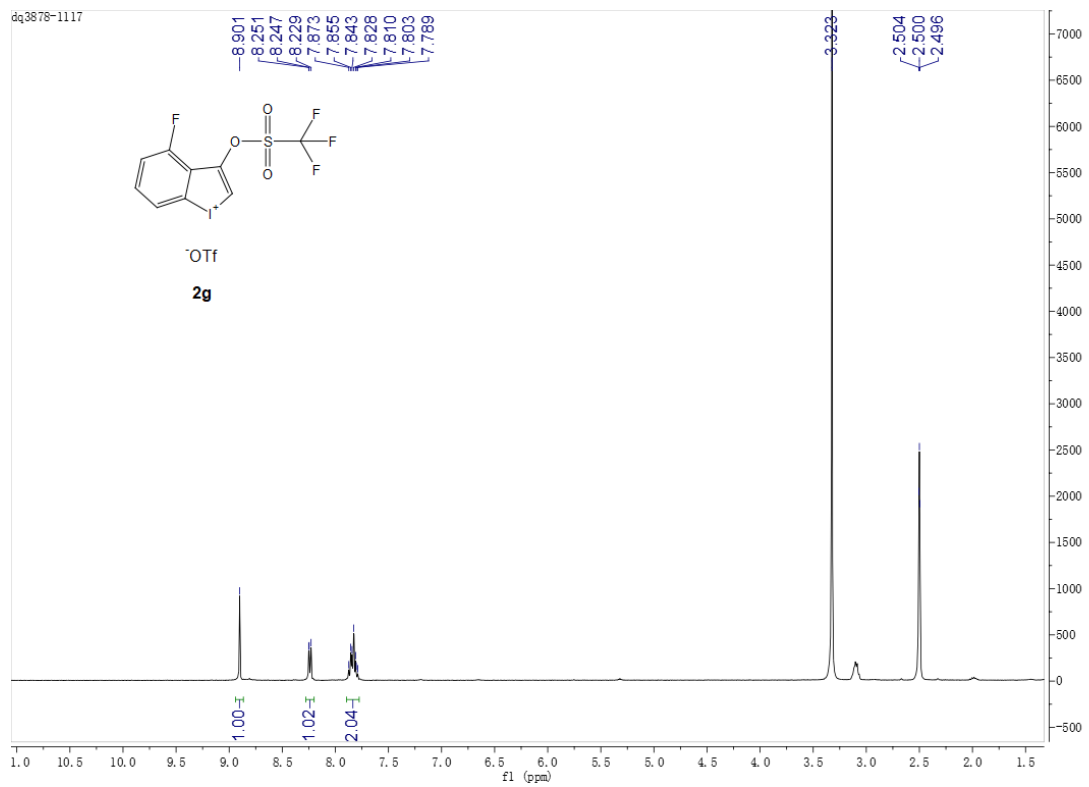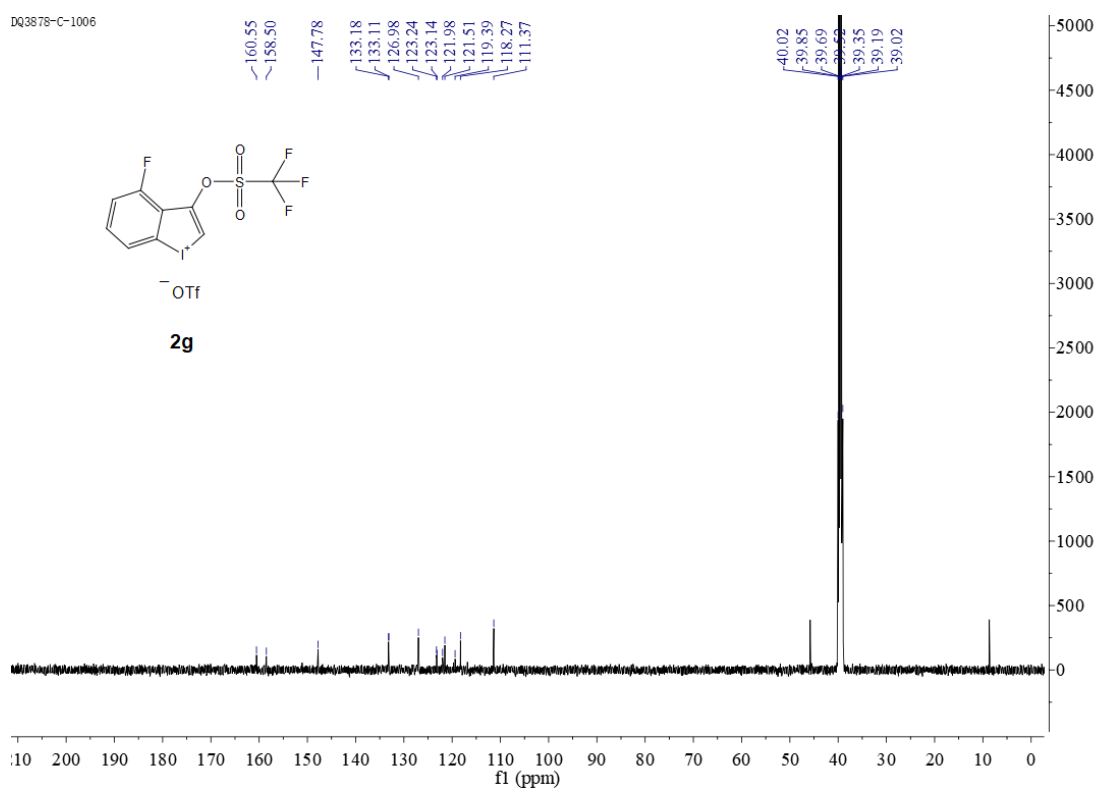



dq3878-1006

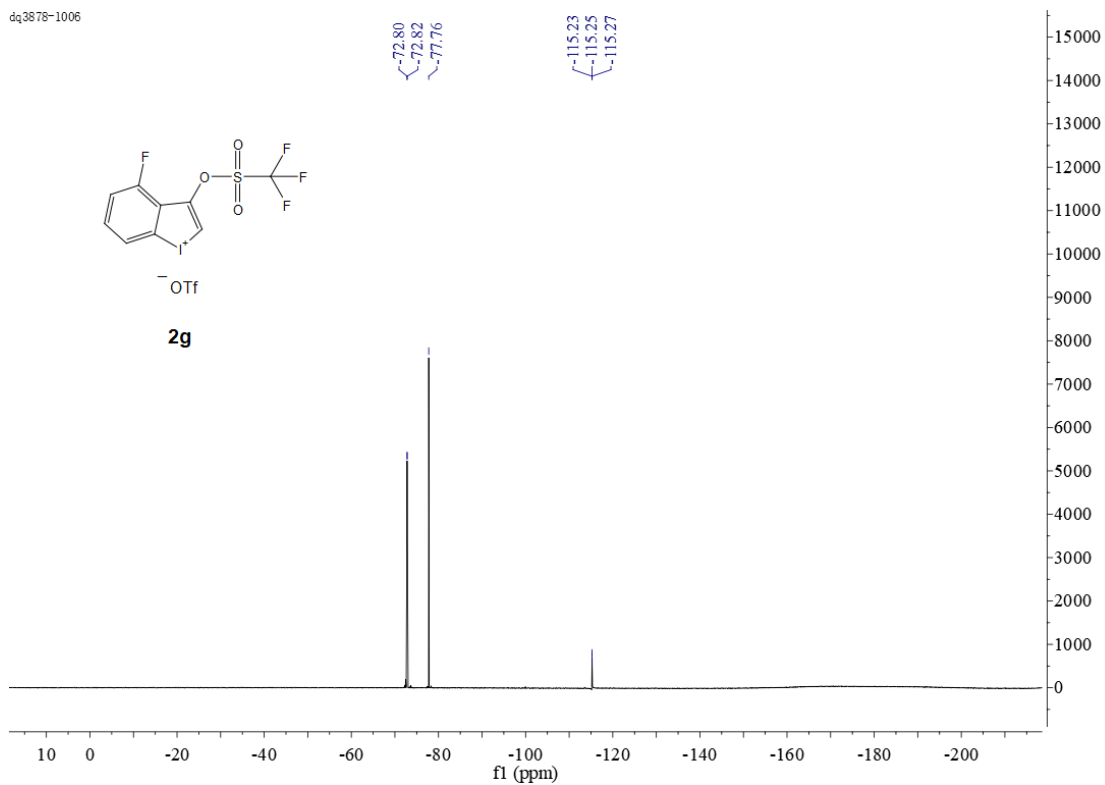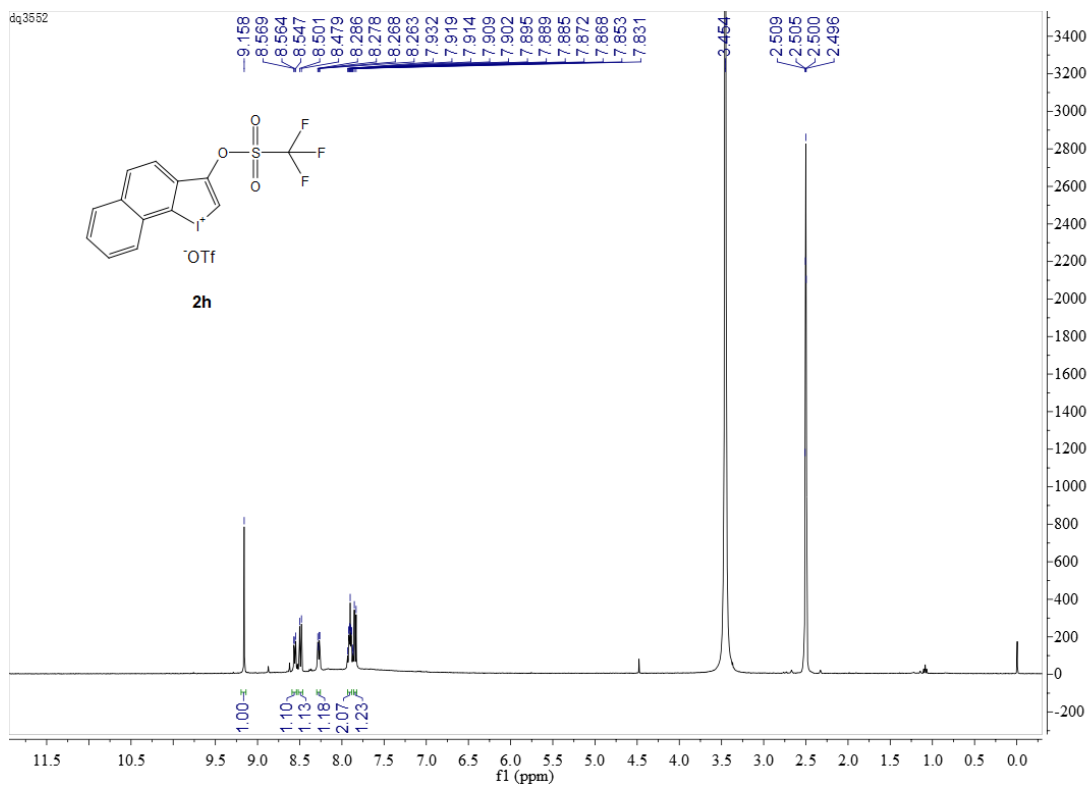

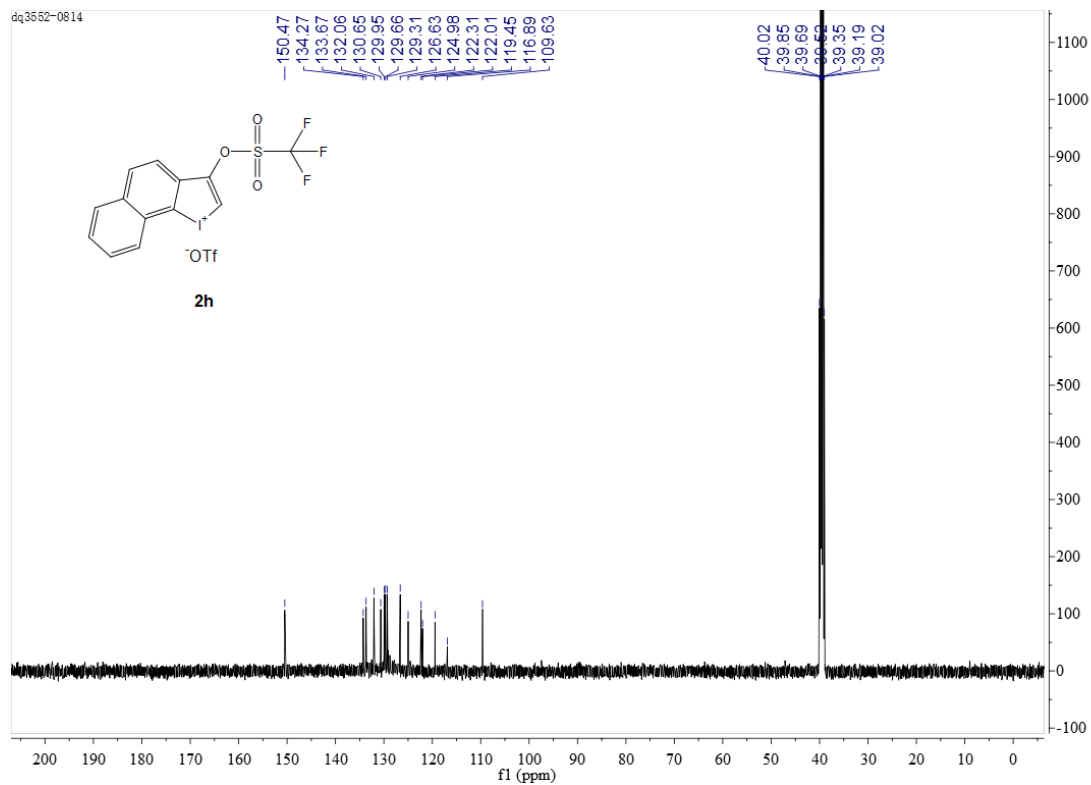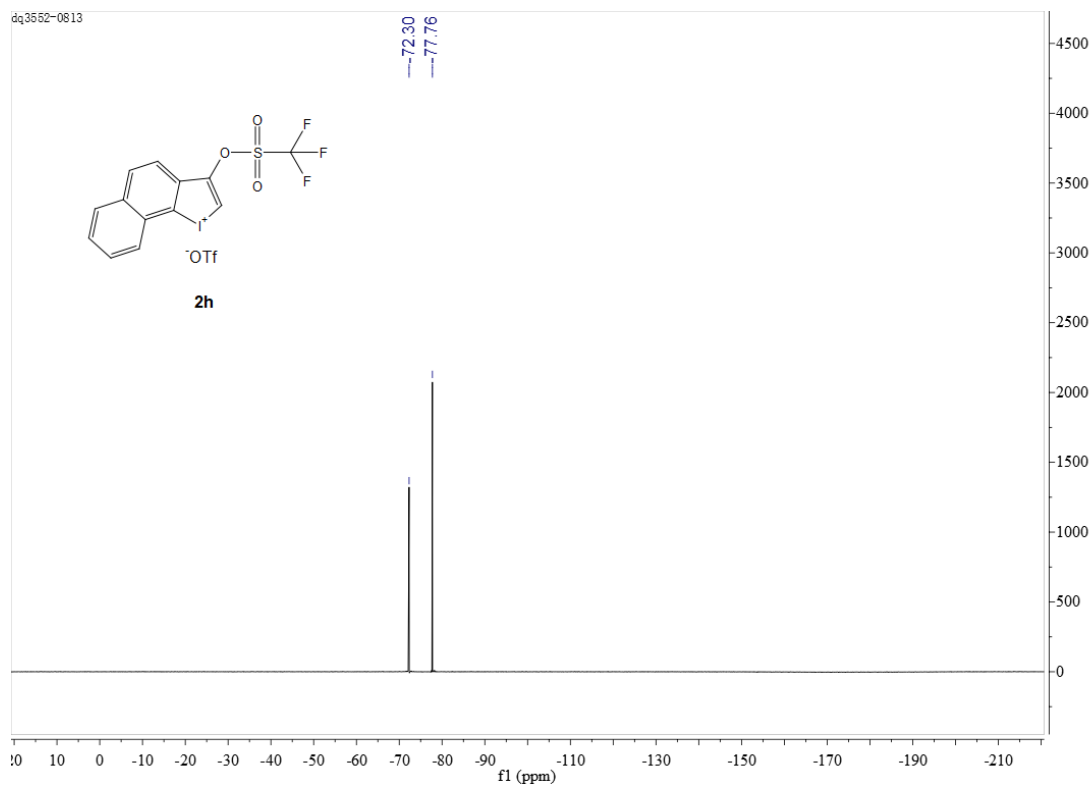

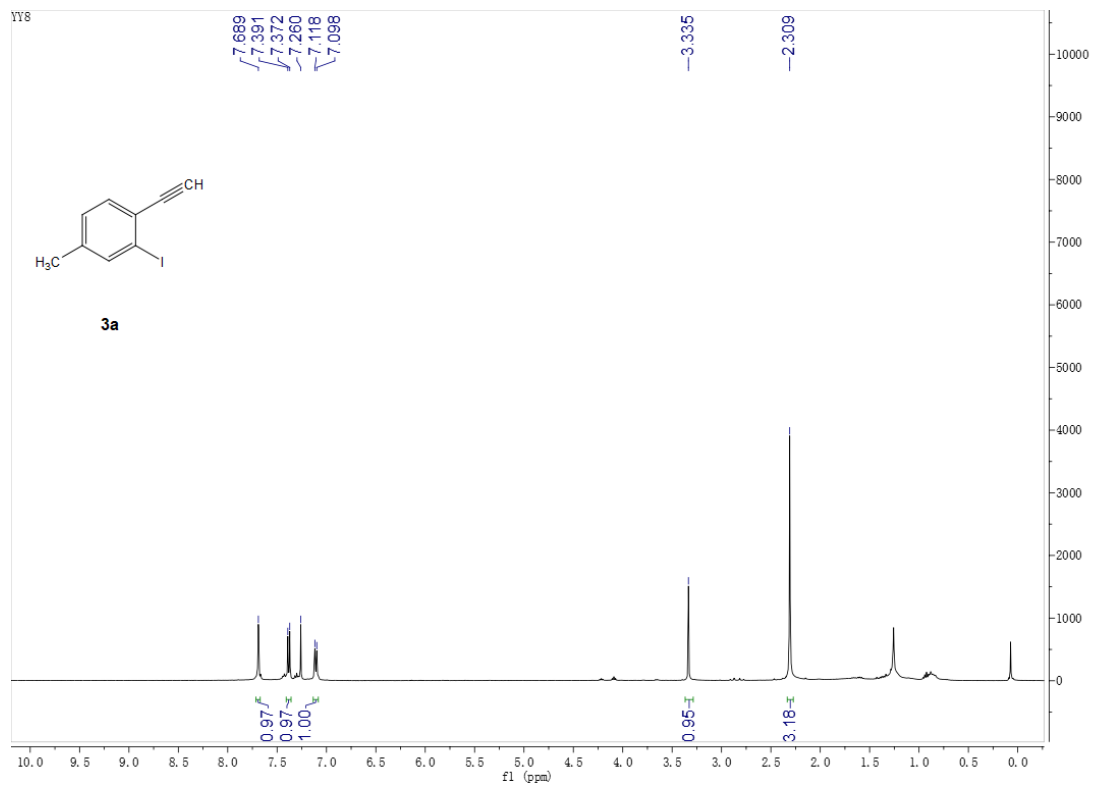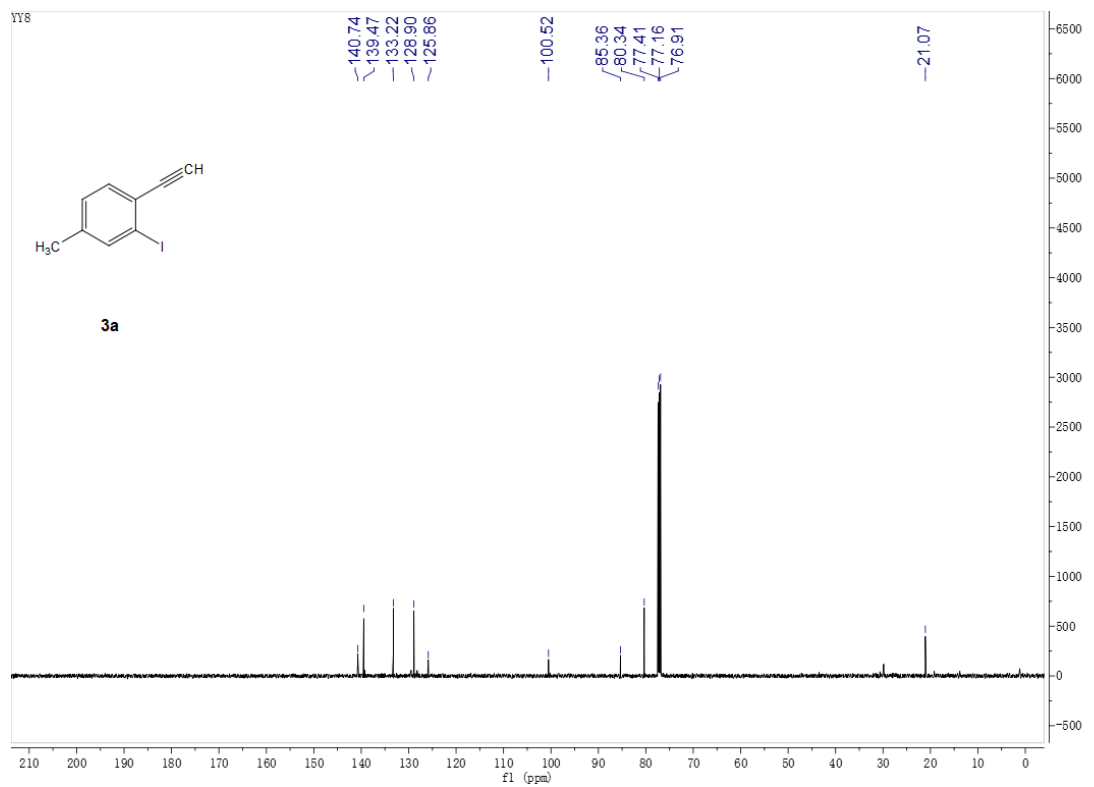

YLS-56

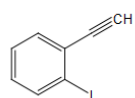

3b

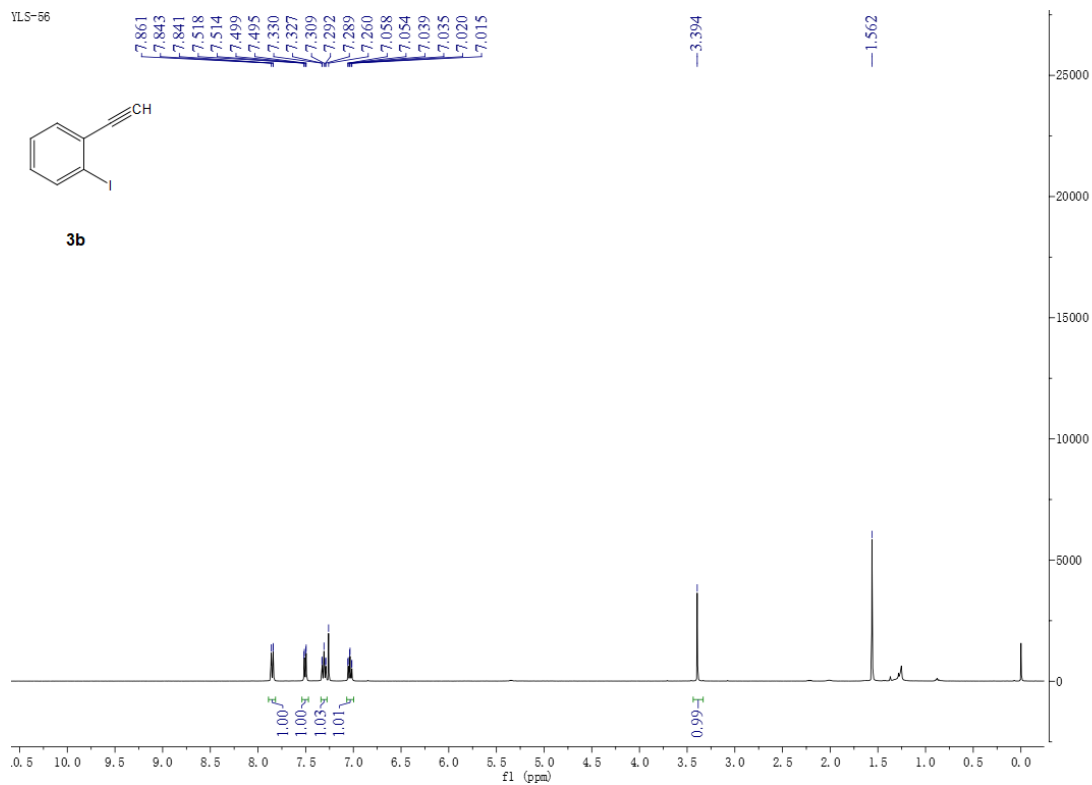

YLS-88-C

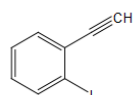

3b

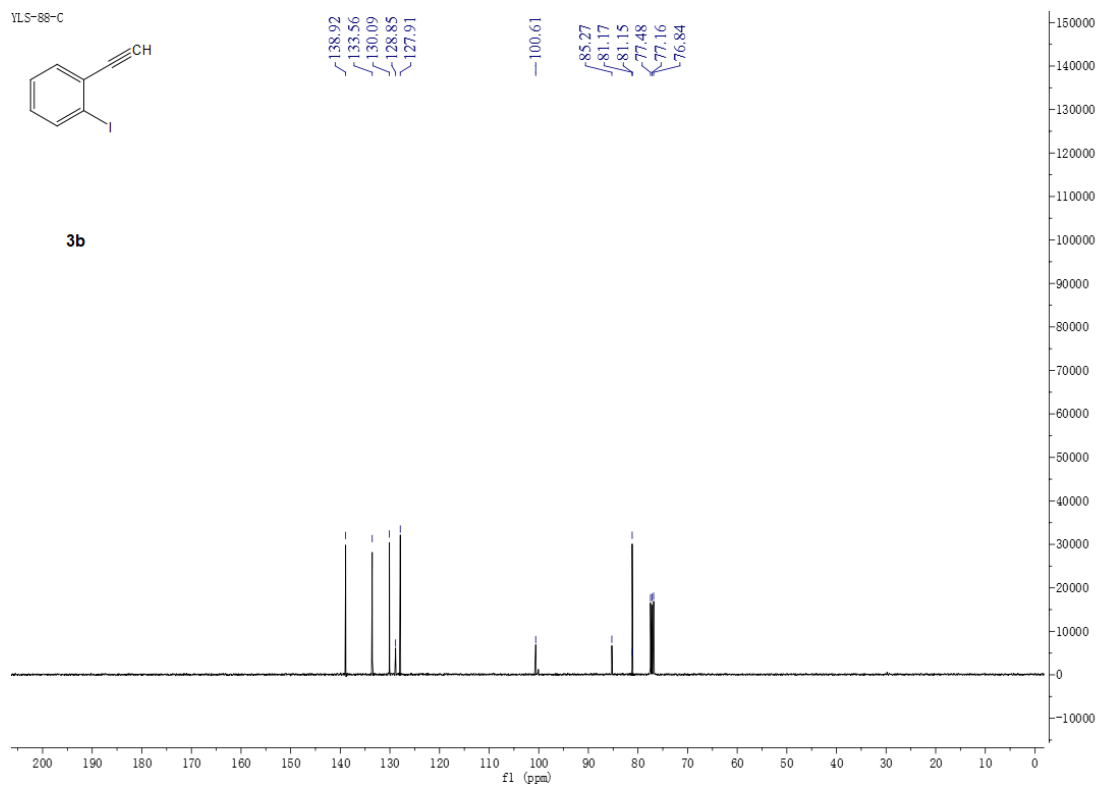

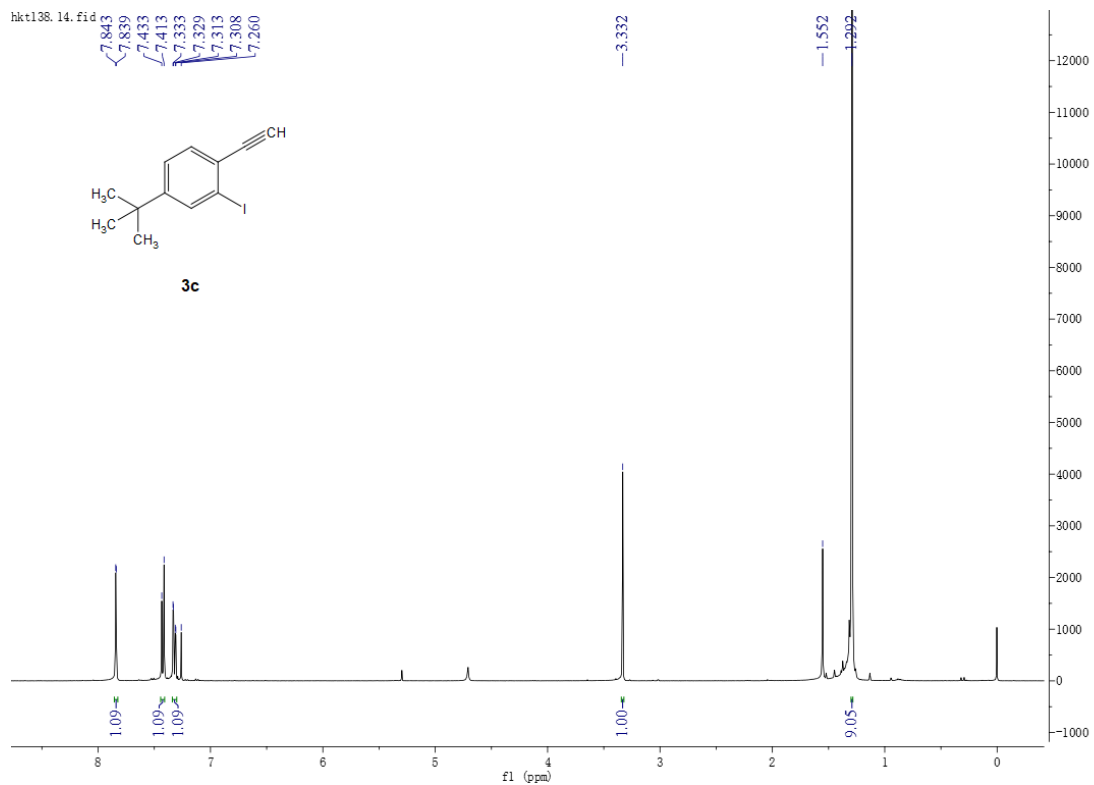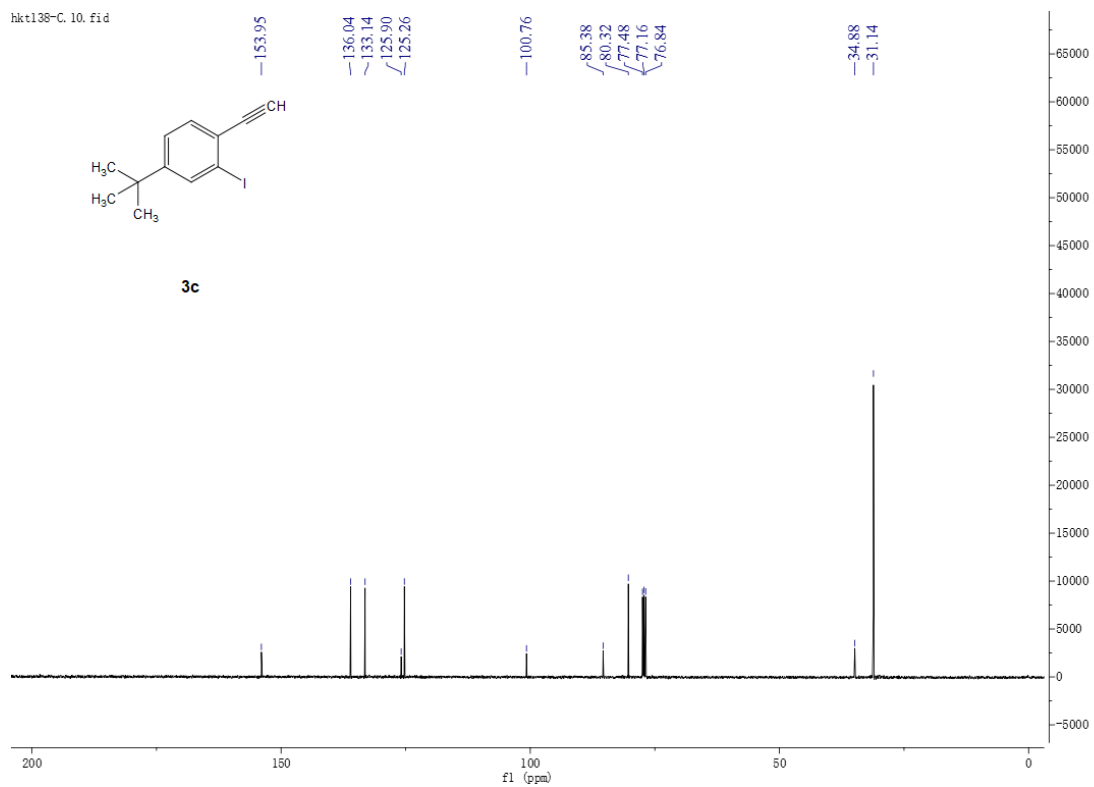

YYT-82

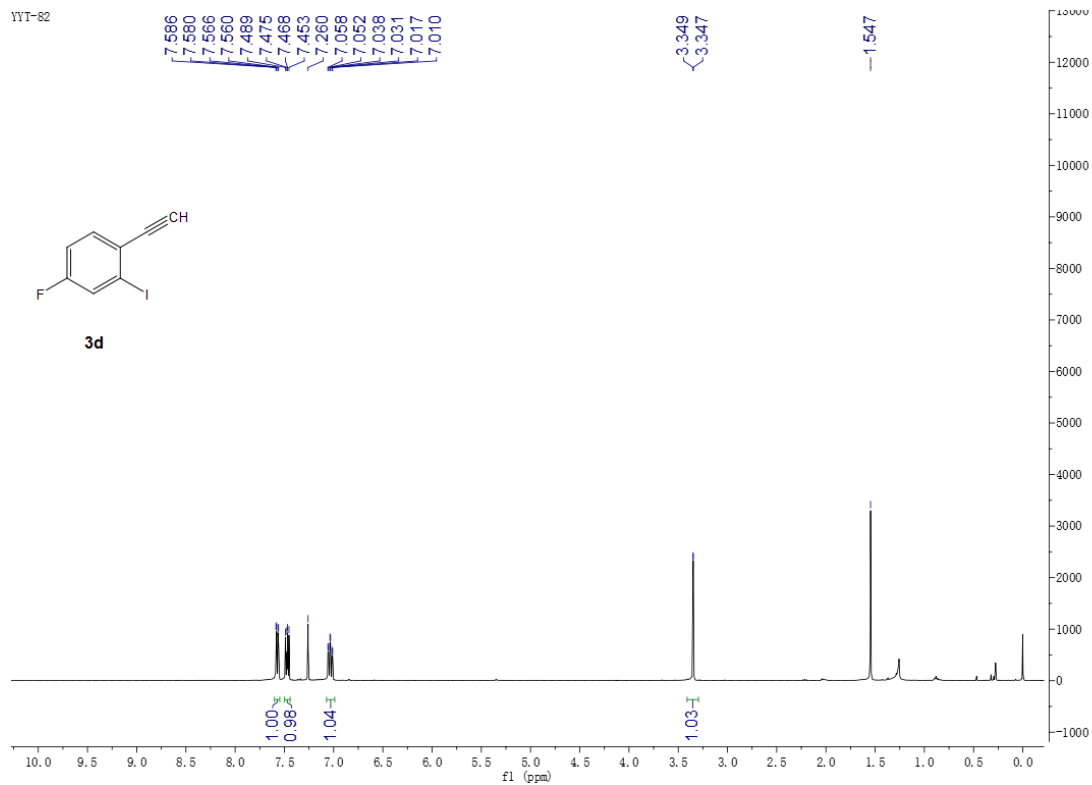

YYT-82-C

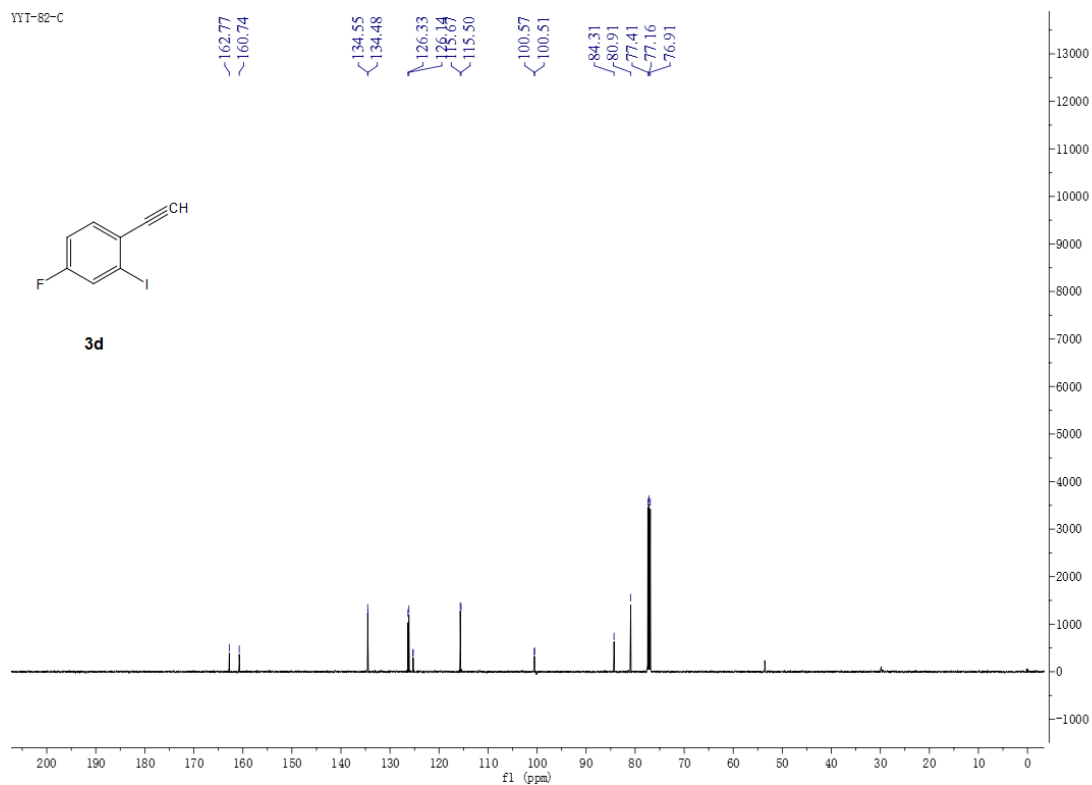

YYT-82

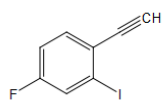

**3d**

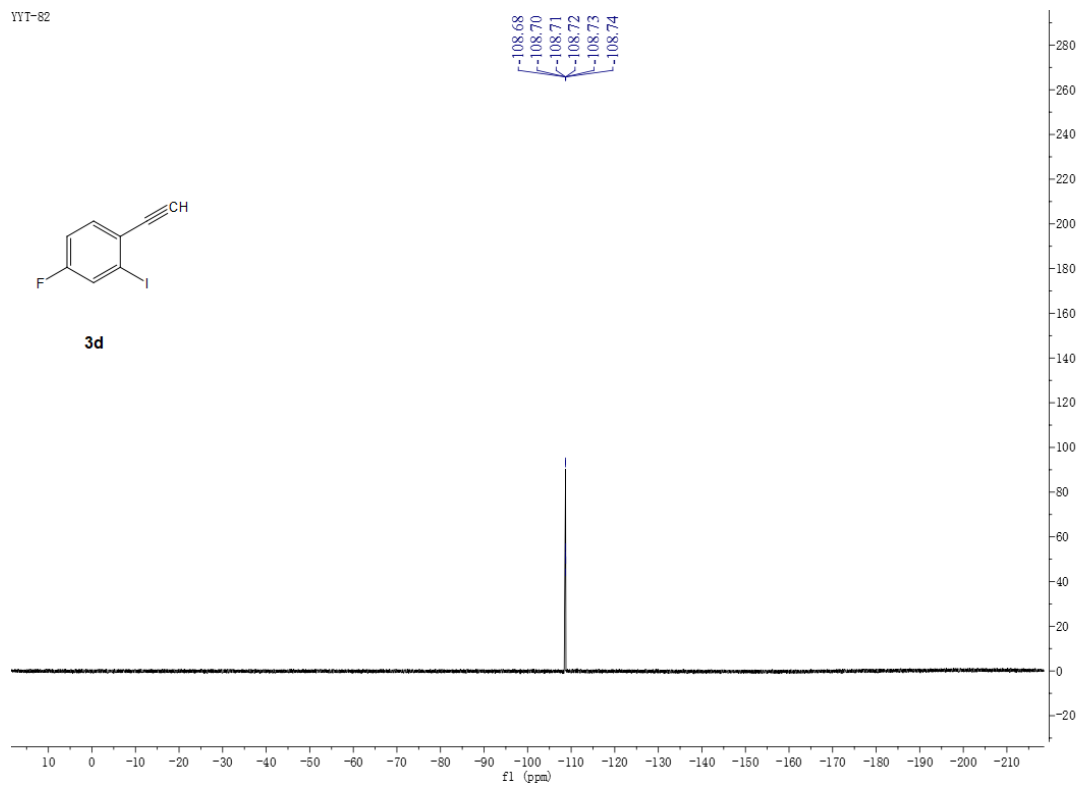

YLS-70 0525

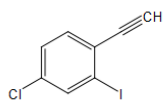

**3e**

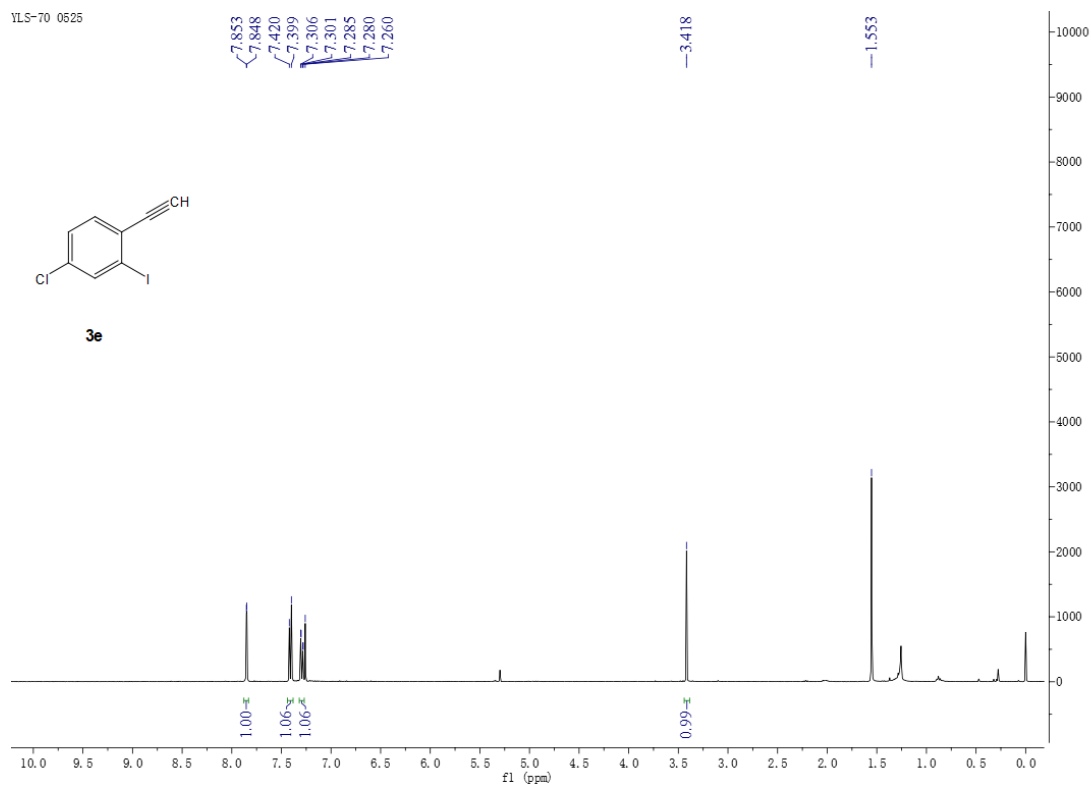

YLS-71-C

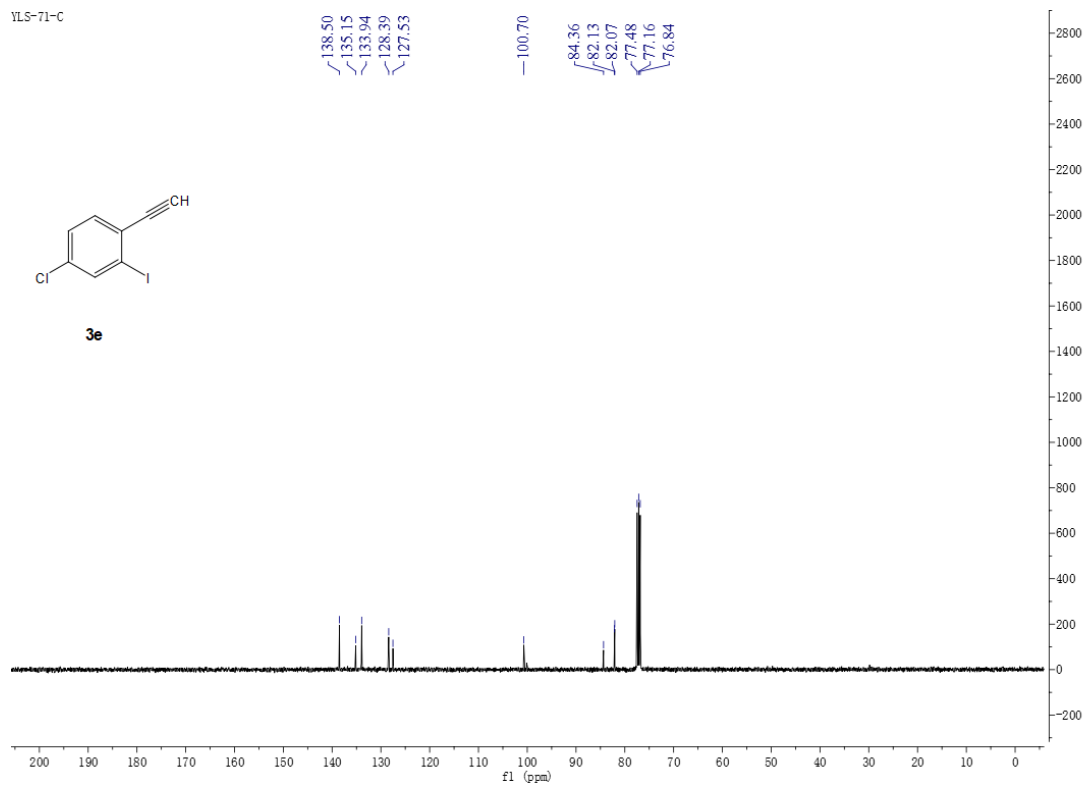

YLS-74

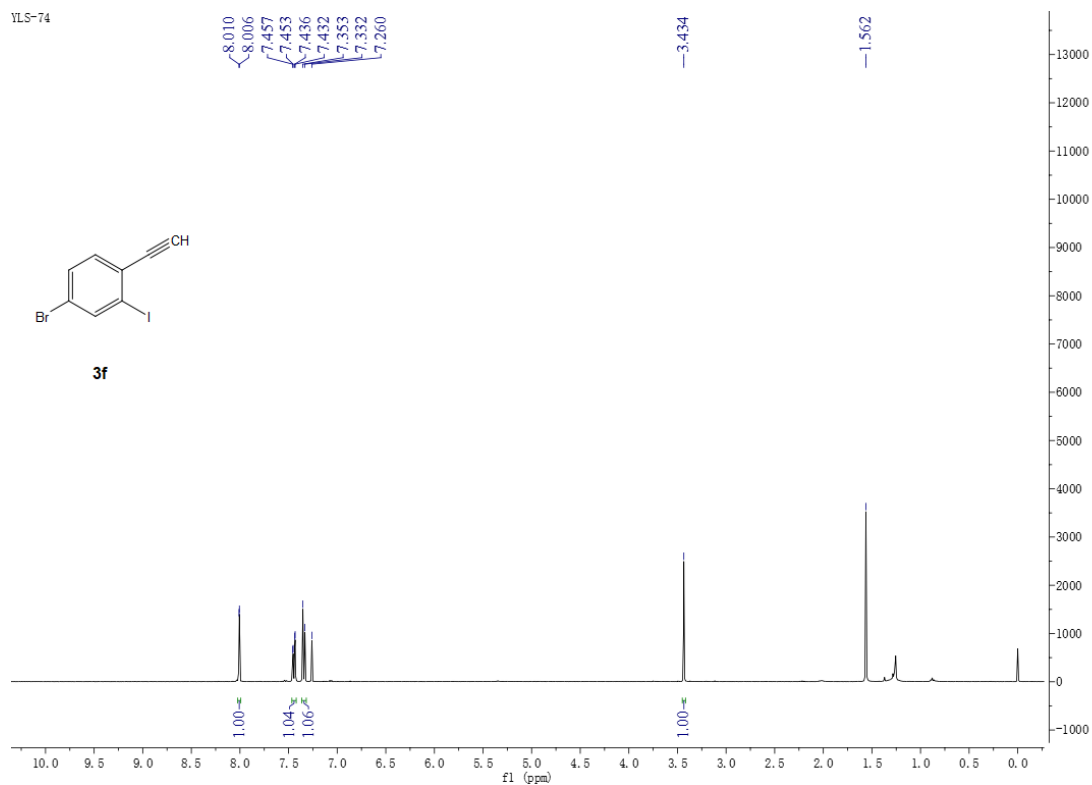



YLS-74-C

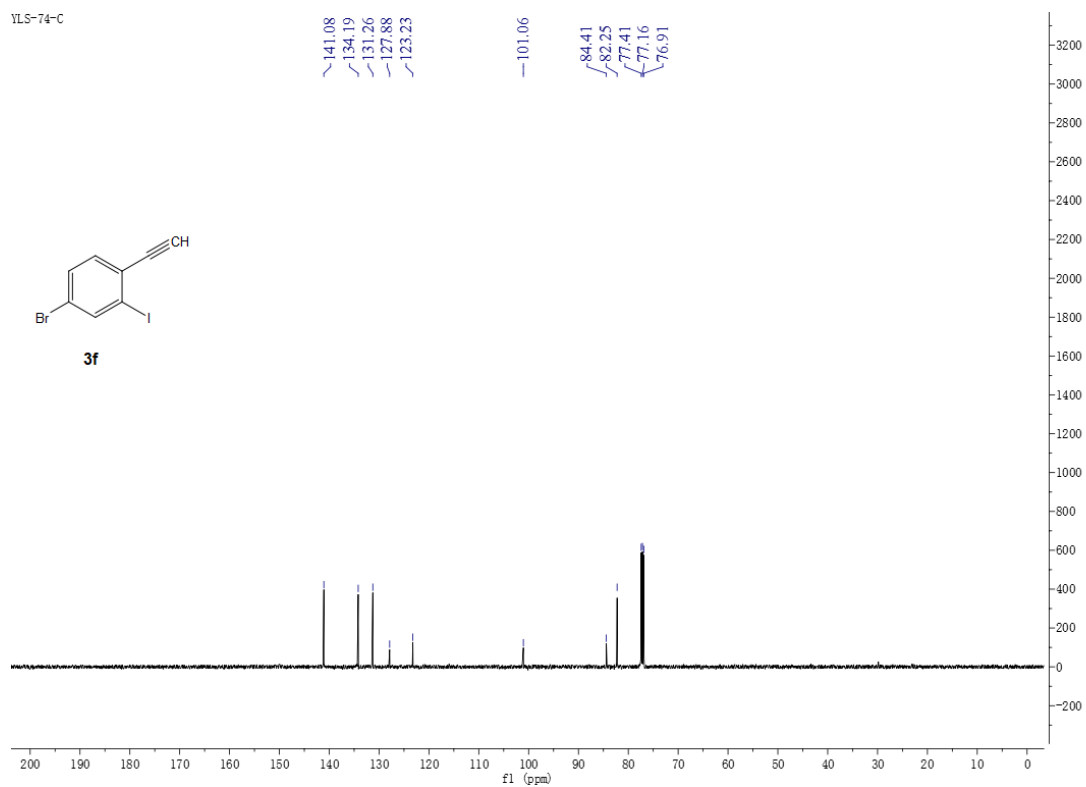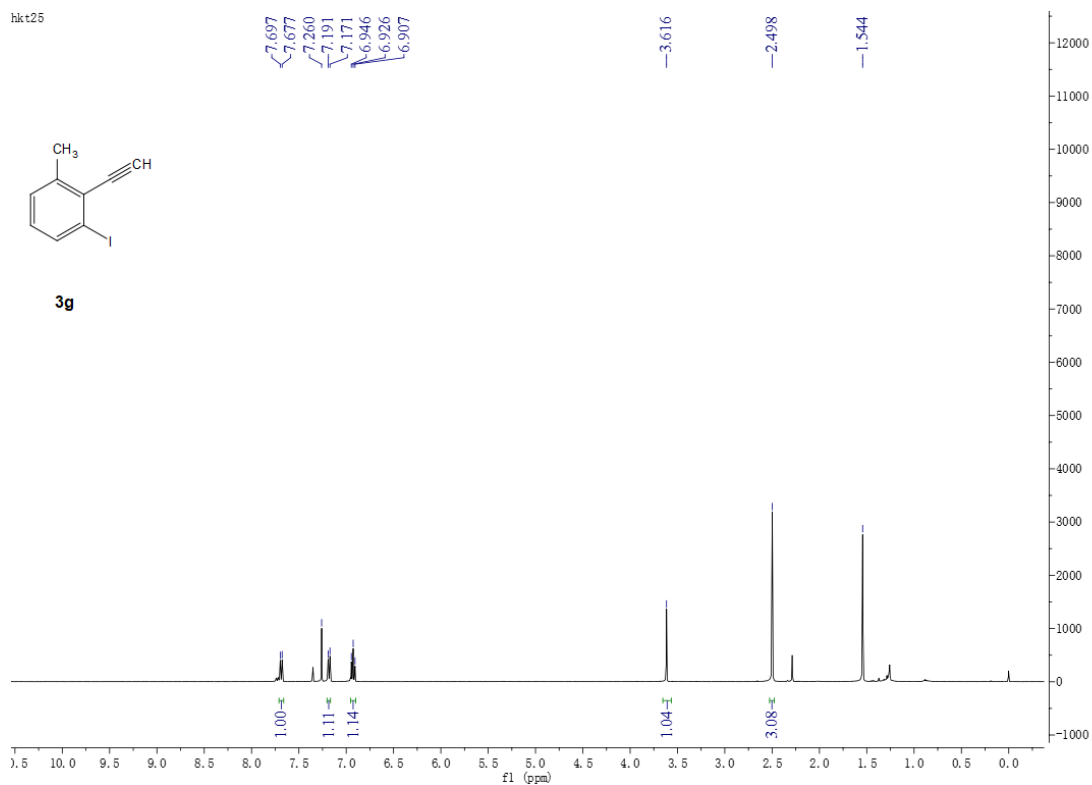

HKT-25-C

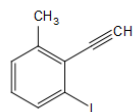

3g

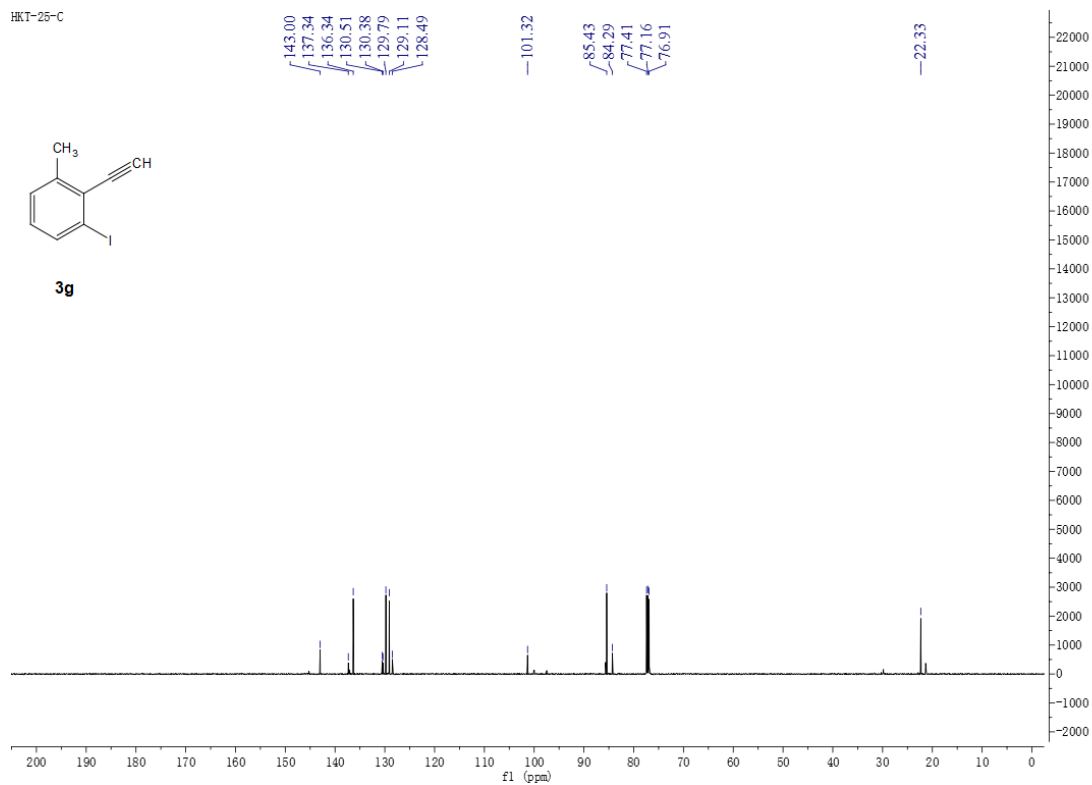

y1s85

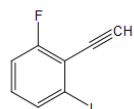

3h

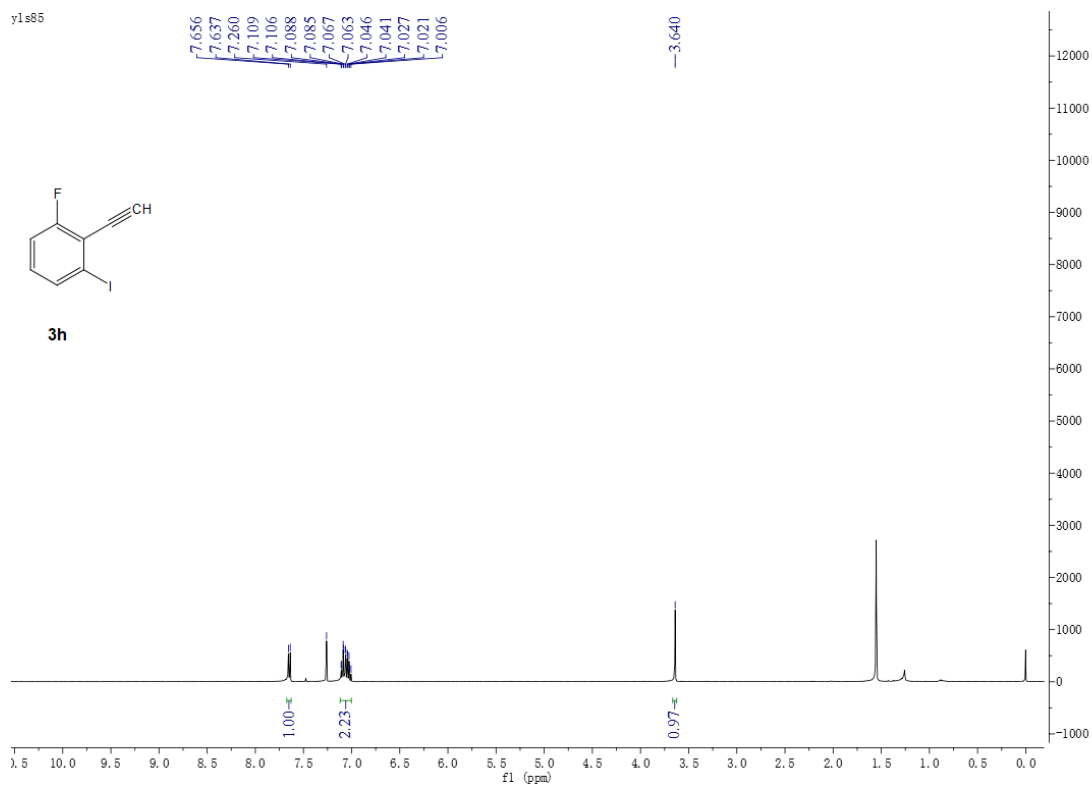

YLS-85-C

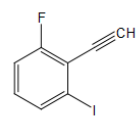

3h

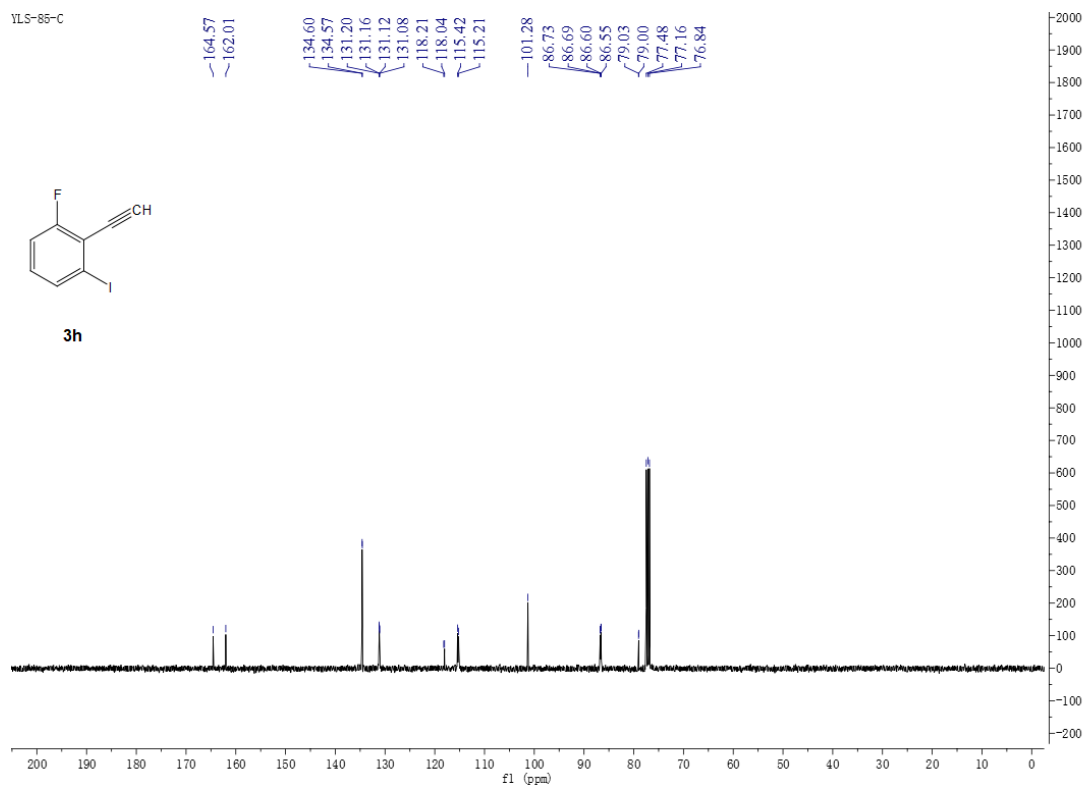

YLS-85-F

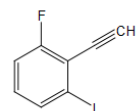

3h

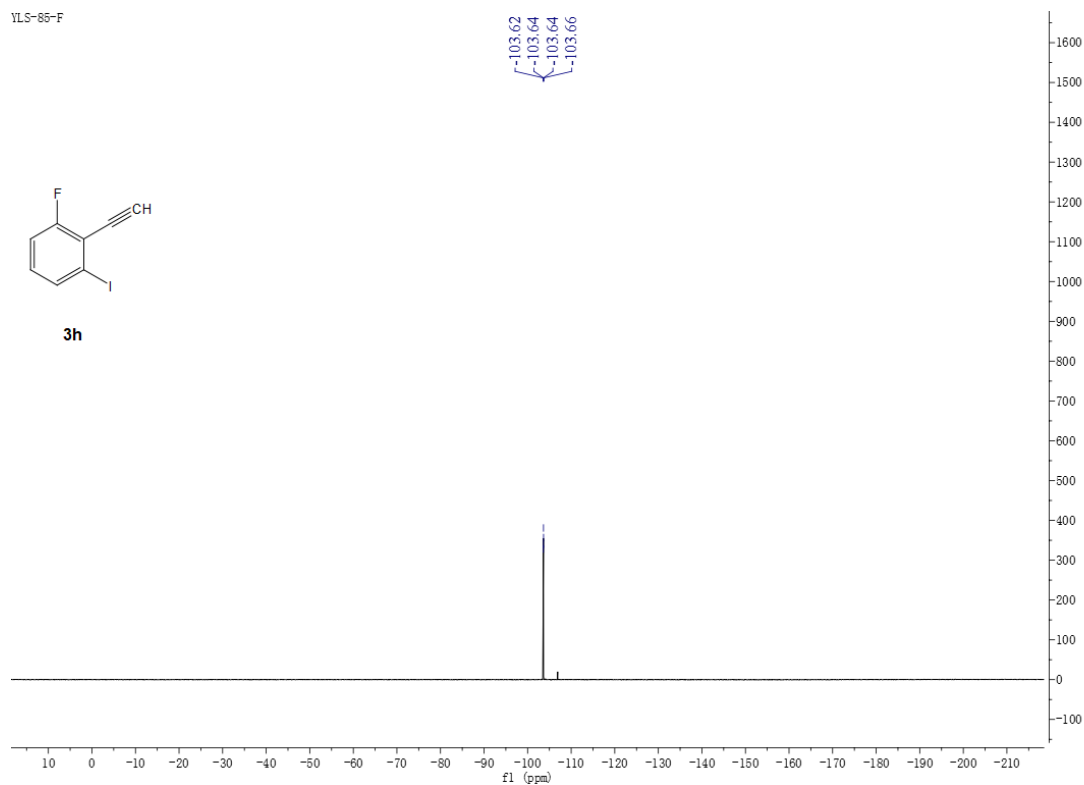

yls-80

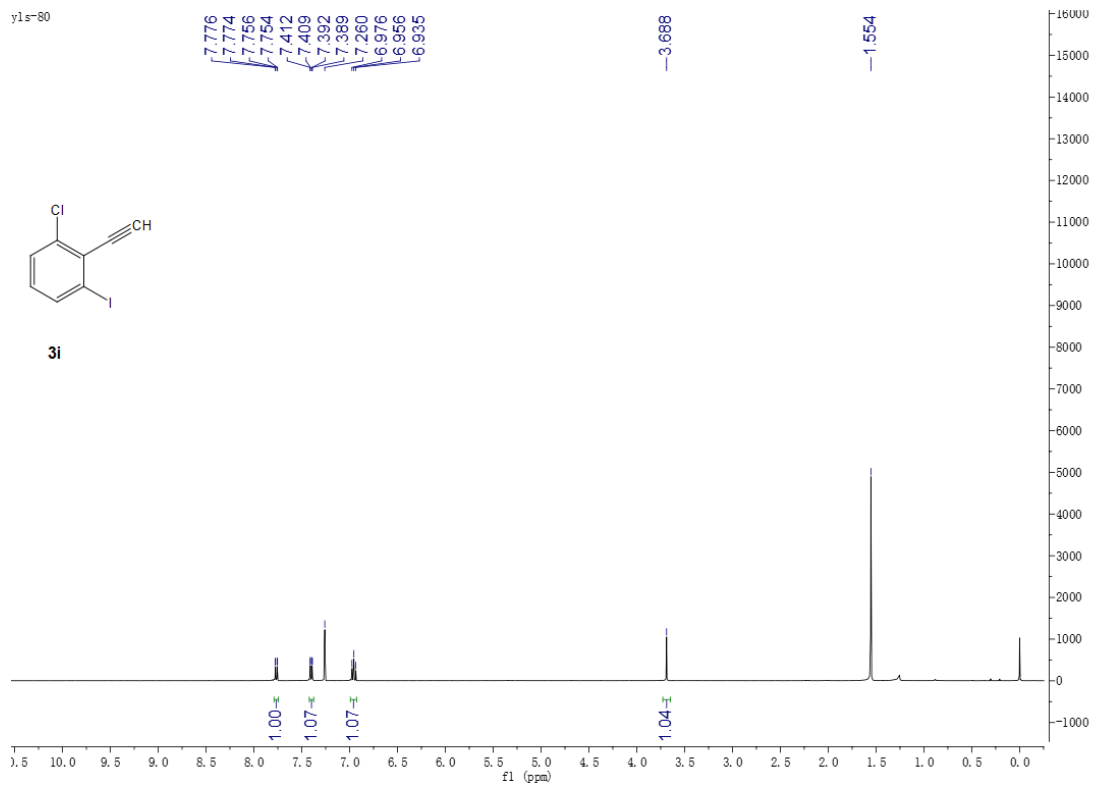

YLS-80-C

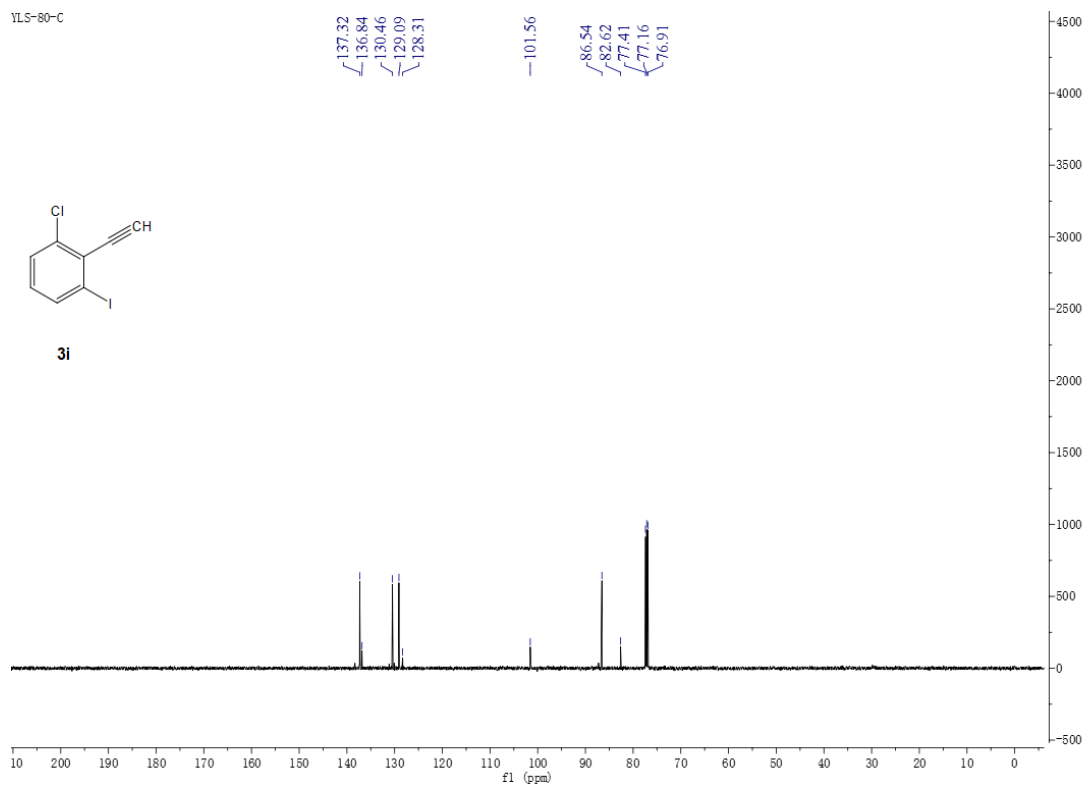

hkt45.13.fid

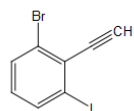

3j

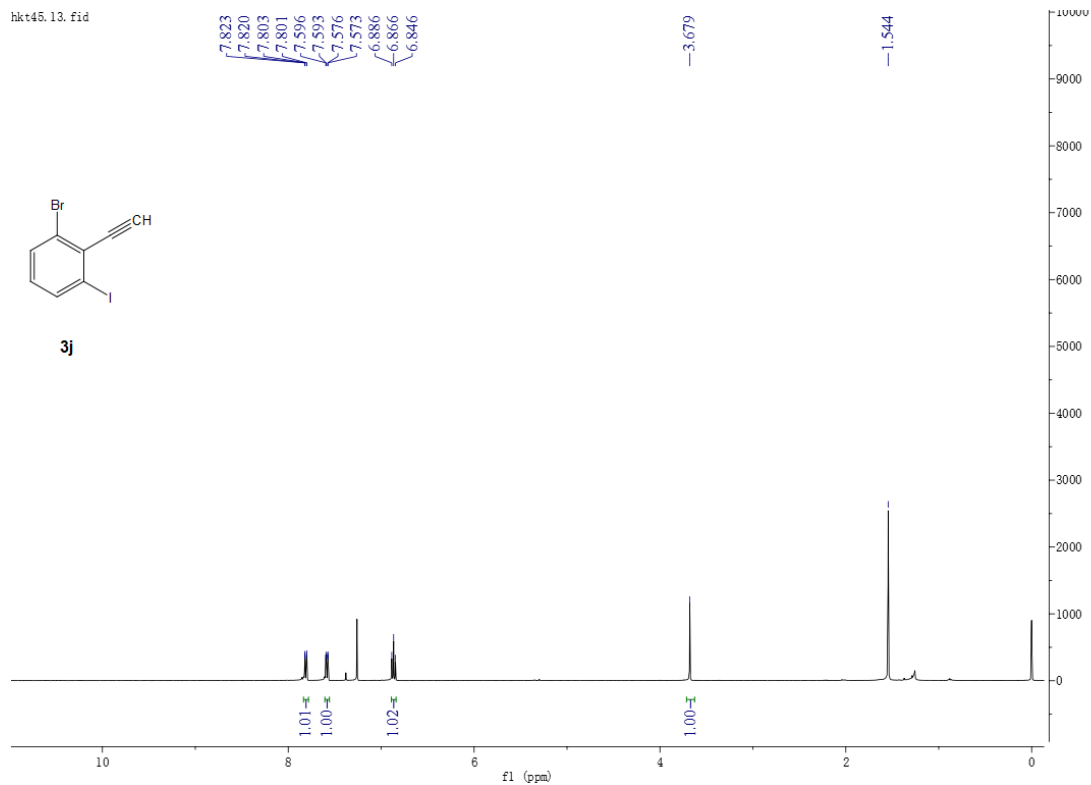

hkt45-c

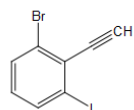

3j

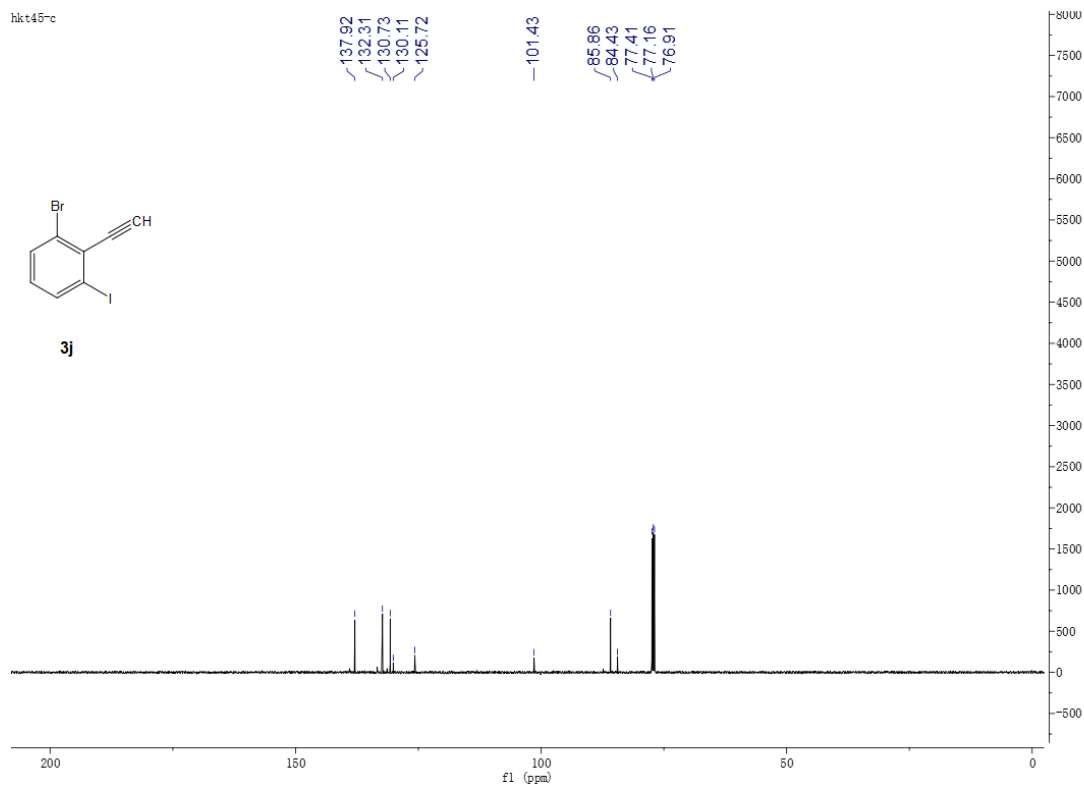

hkt162.10.fid

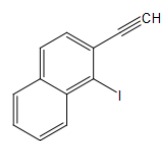

**3k**

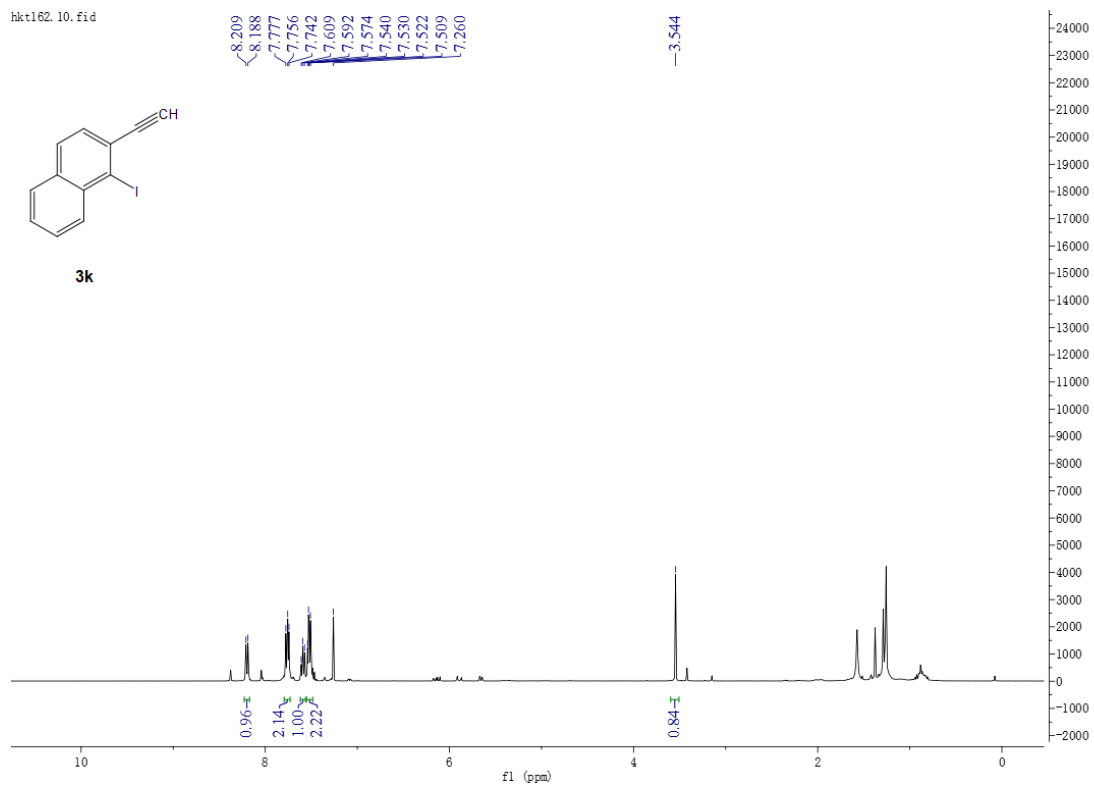

hkt162-C.12.fid



**3k**

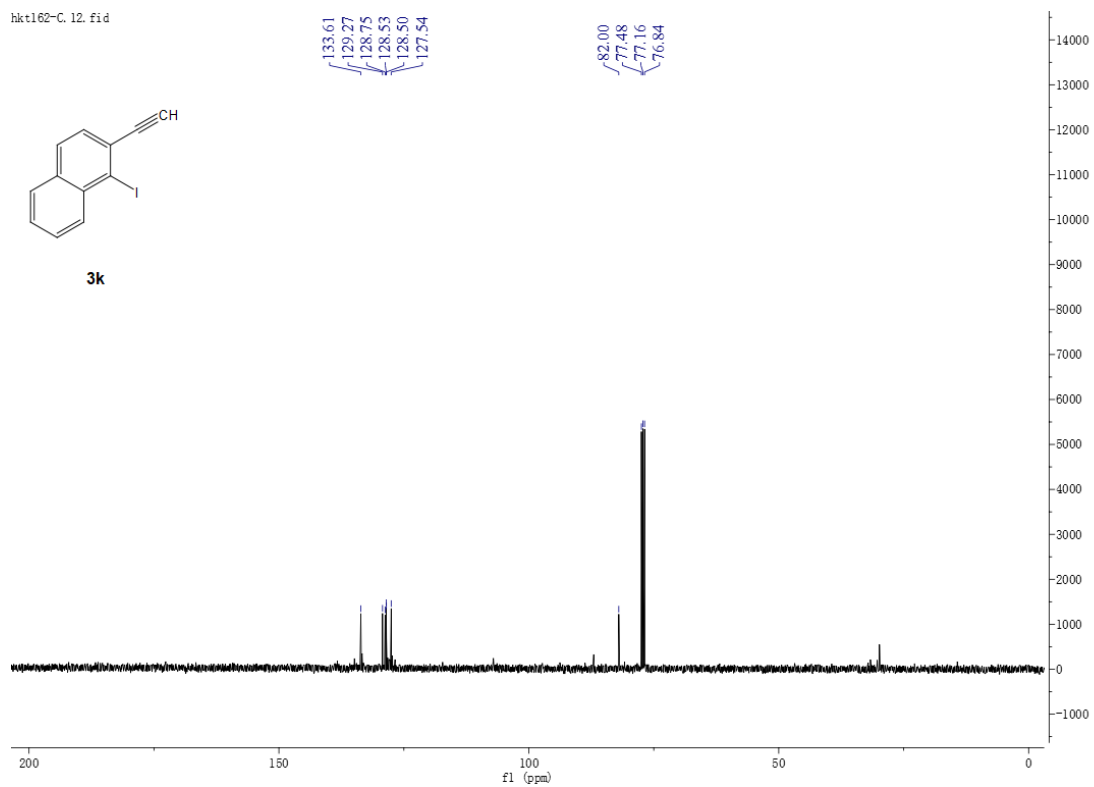

yyt-88

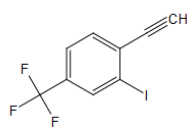

31

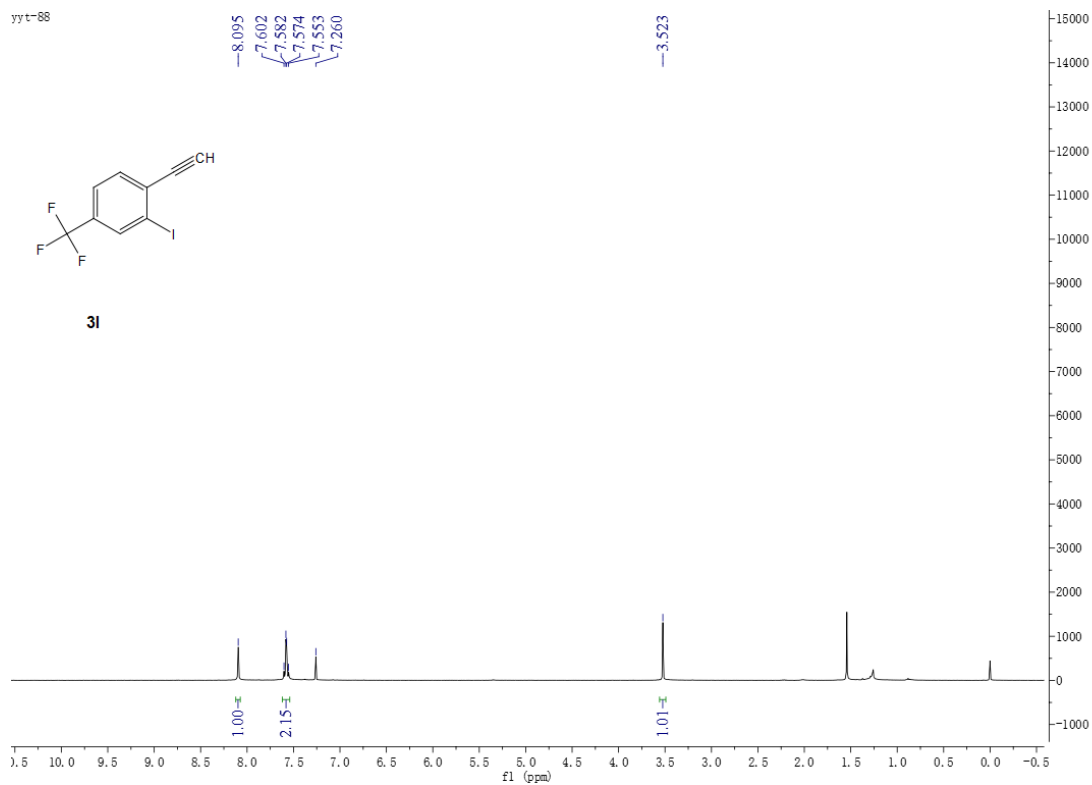

YYT-88-C

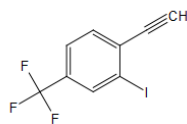

31

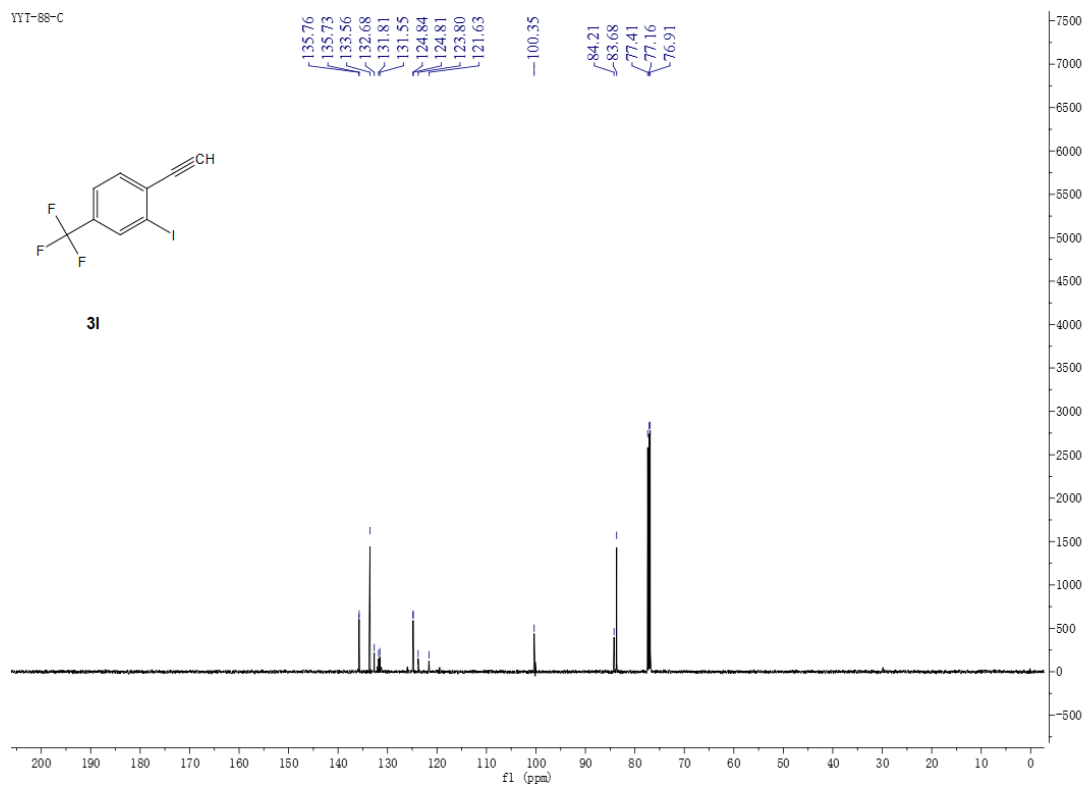

YYT-88-F

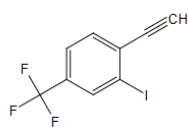

3l

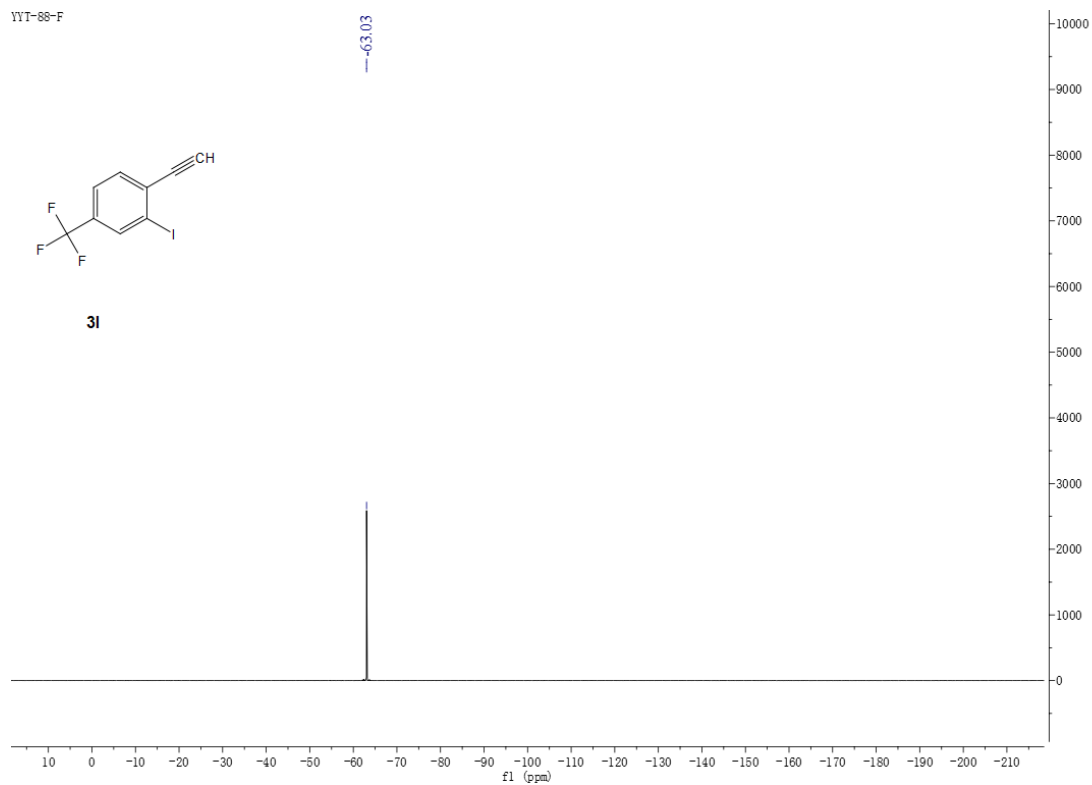

yyt-85

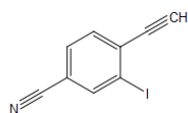

3m

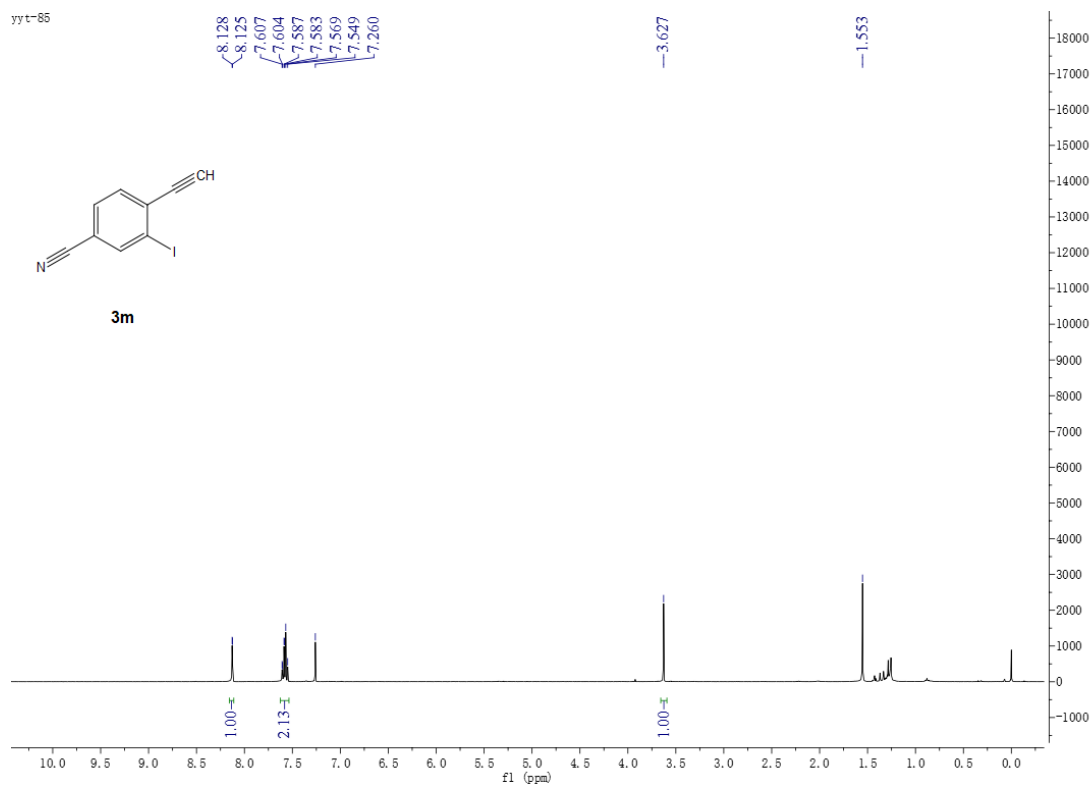



YYT-85-C 0601

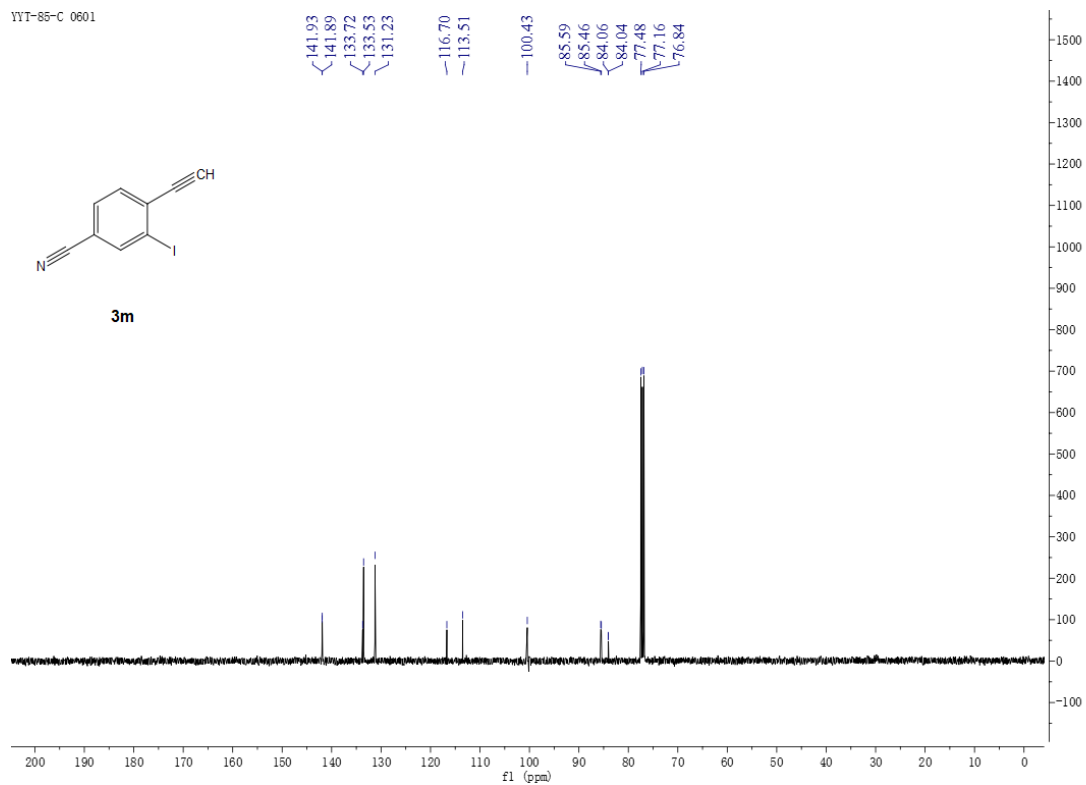

YLS-77 02

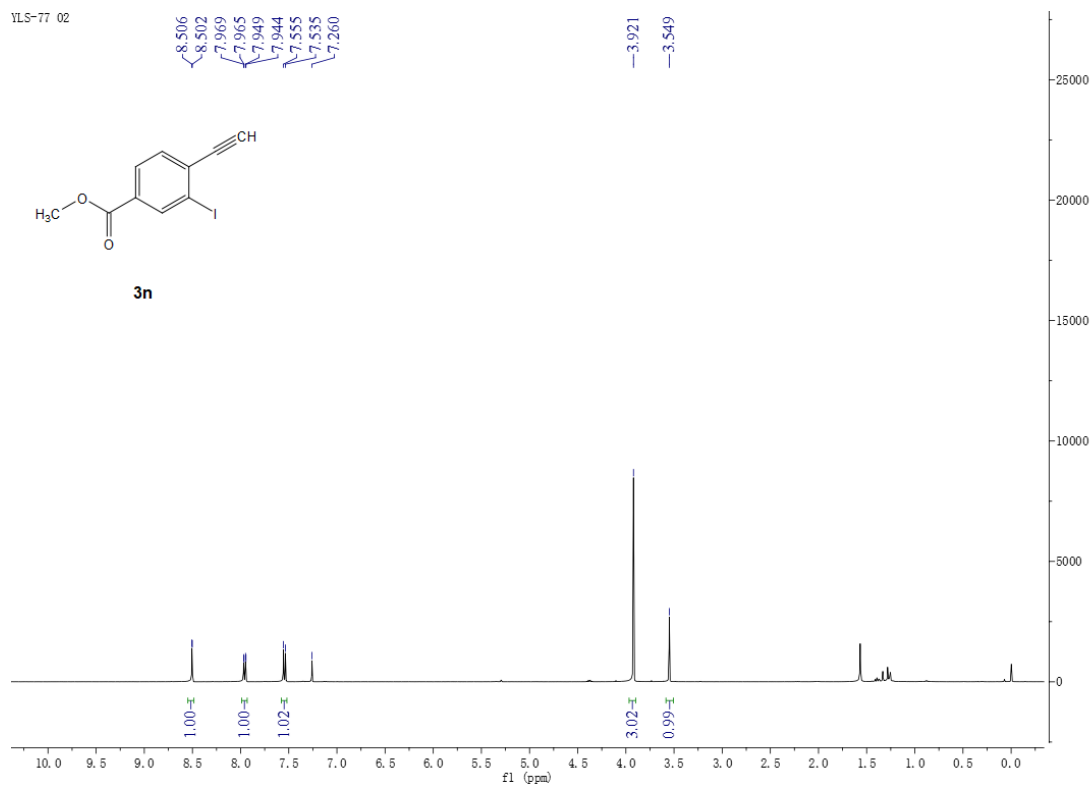

YLS-77-C

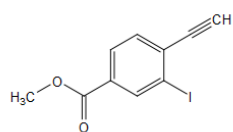

3n

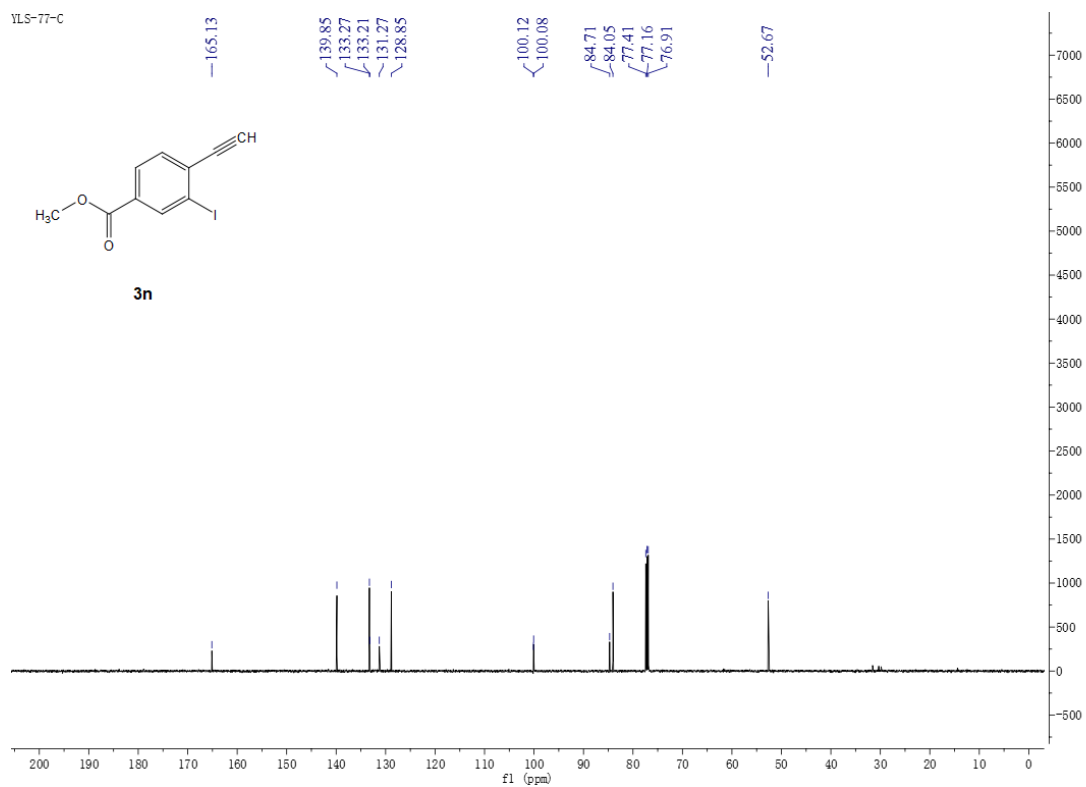

YY11-2

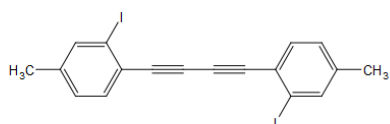

4a

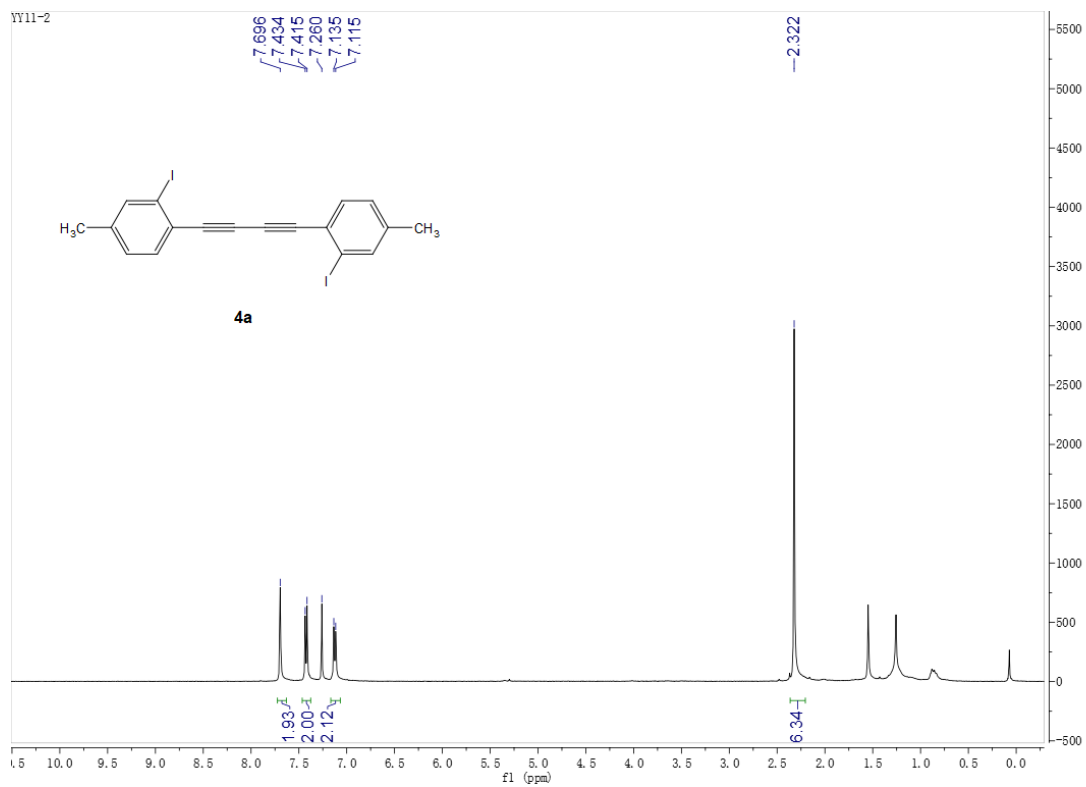

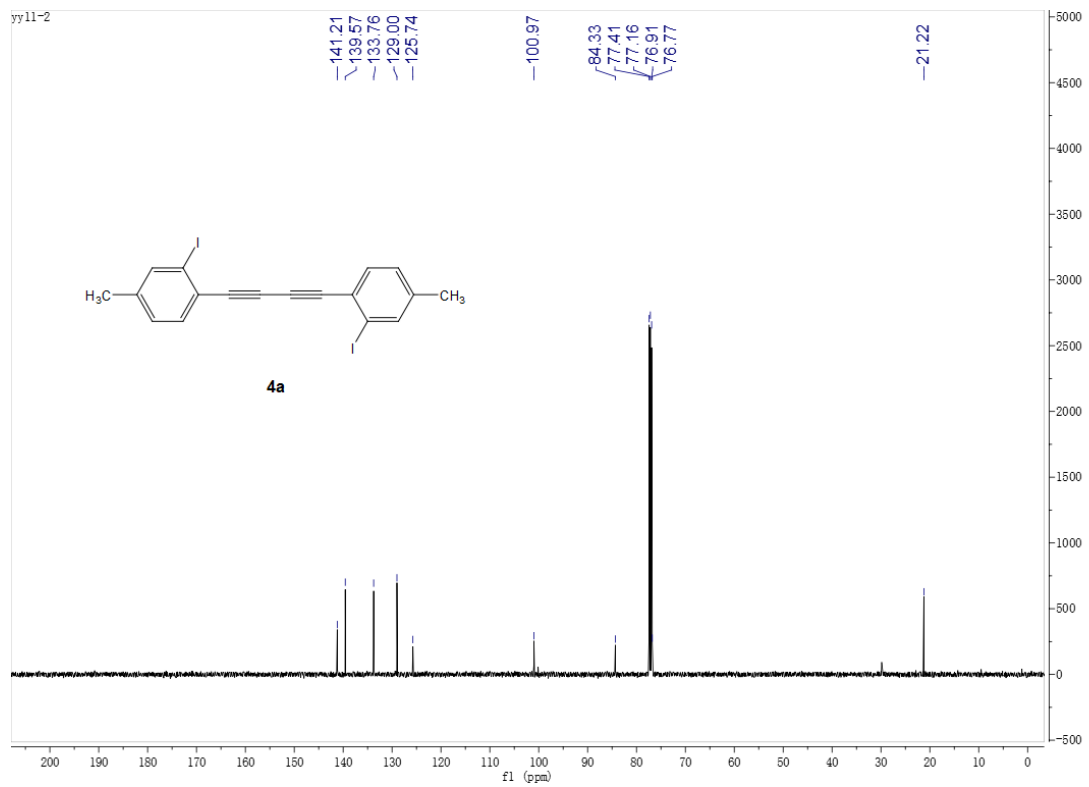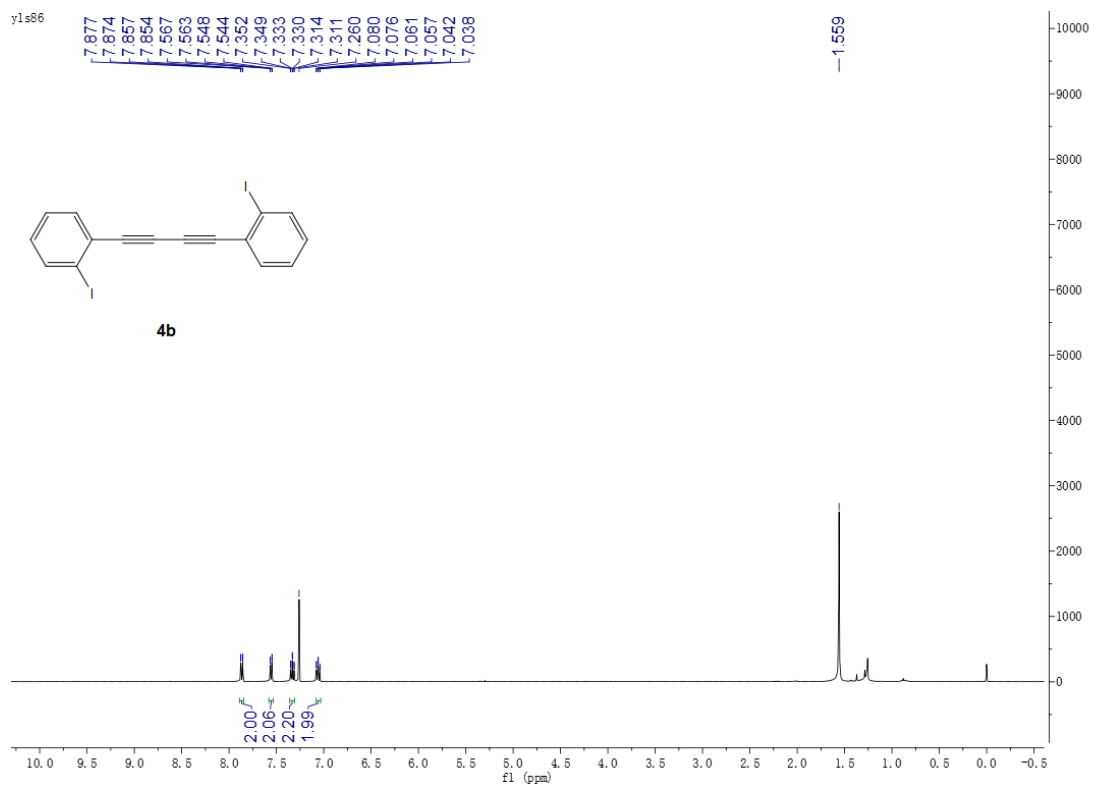

YLS-86-C

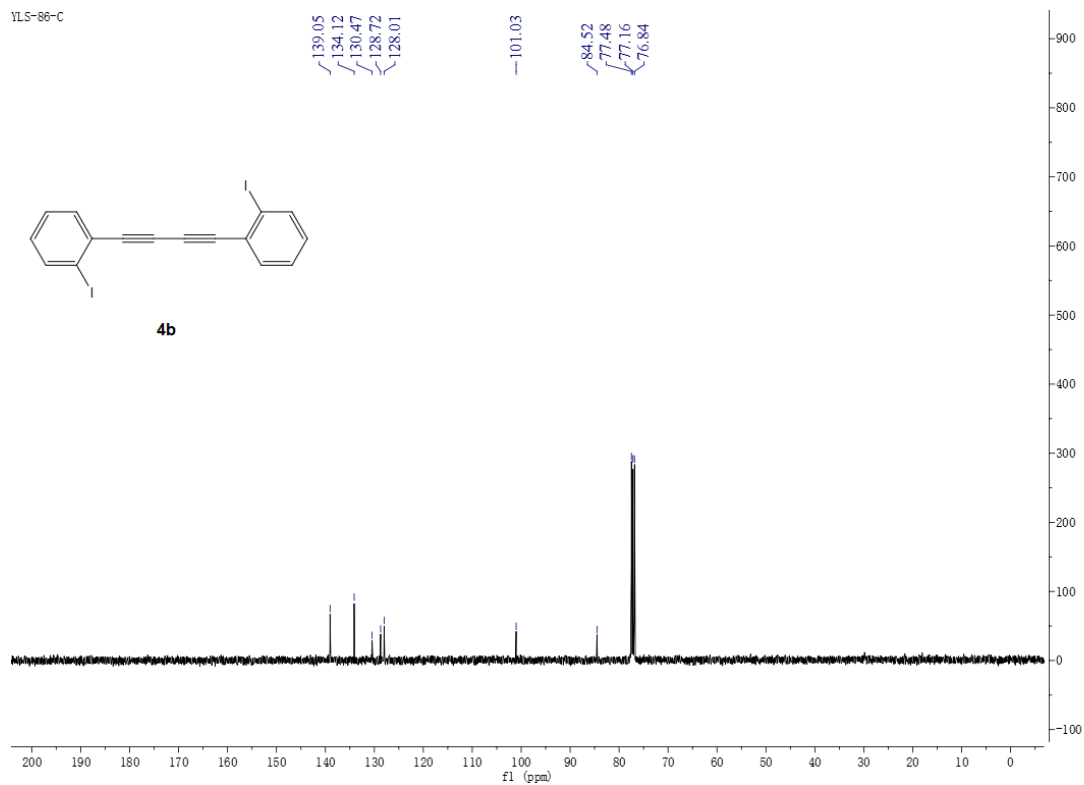

YLS-93

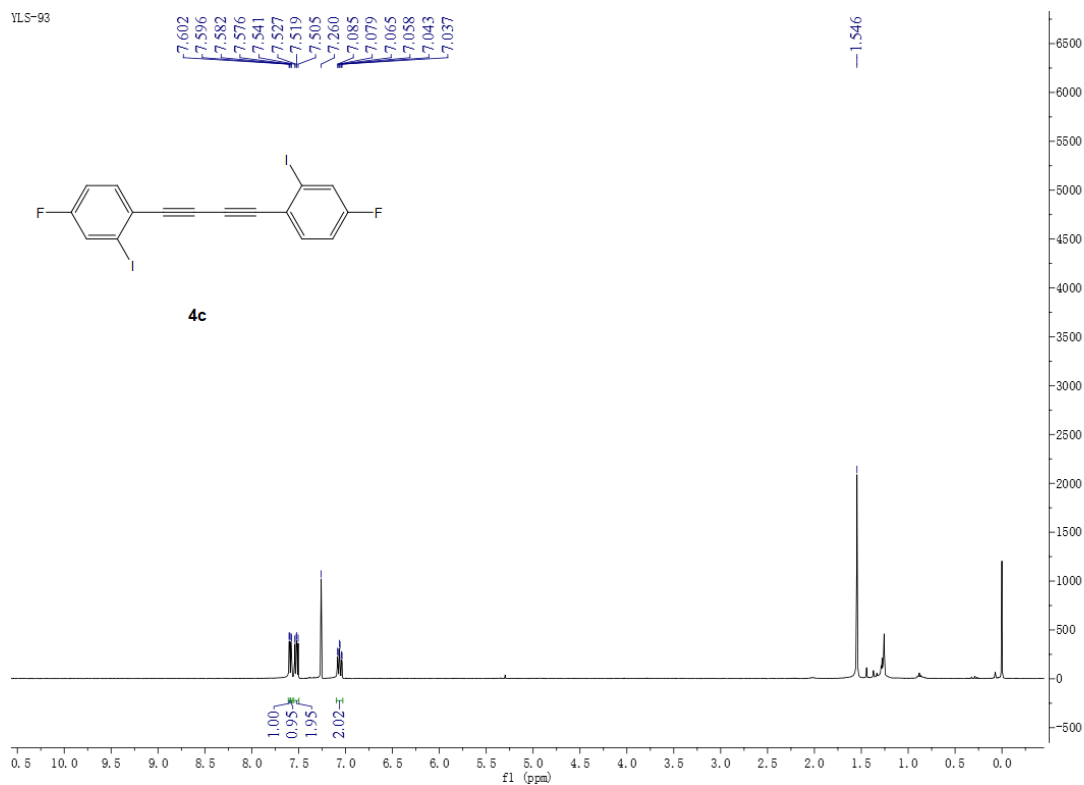

YLS-93-C

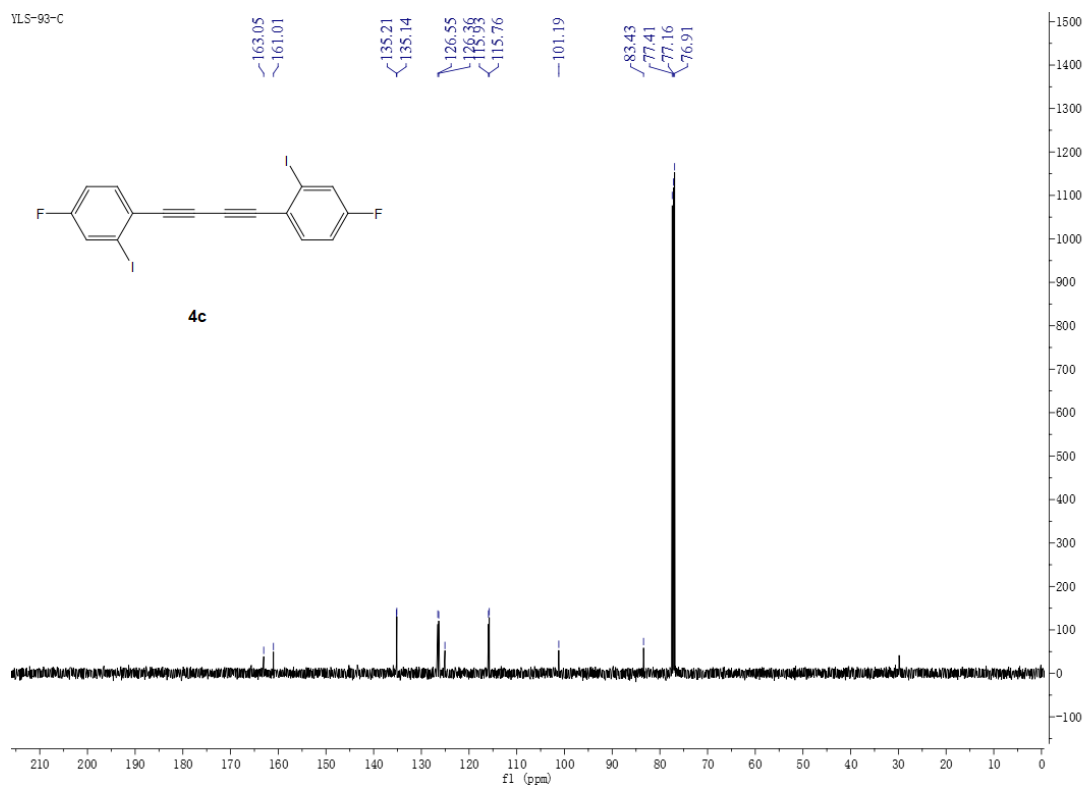

YLS-93-F

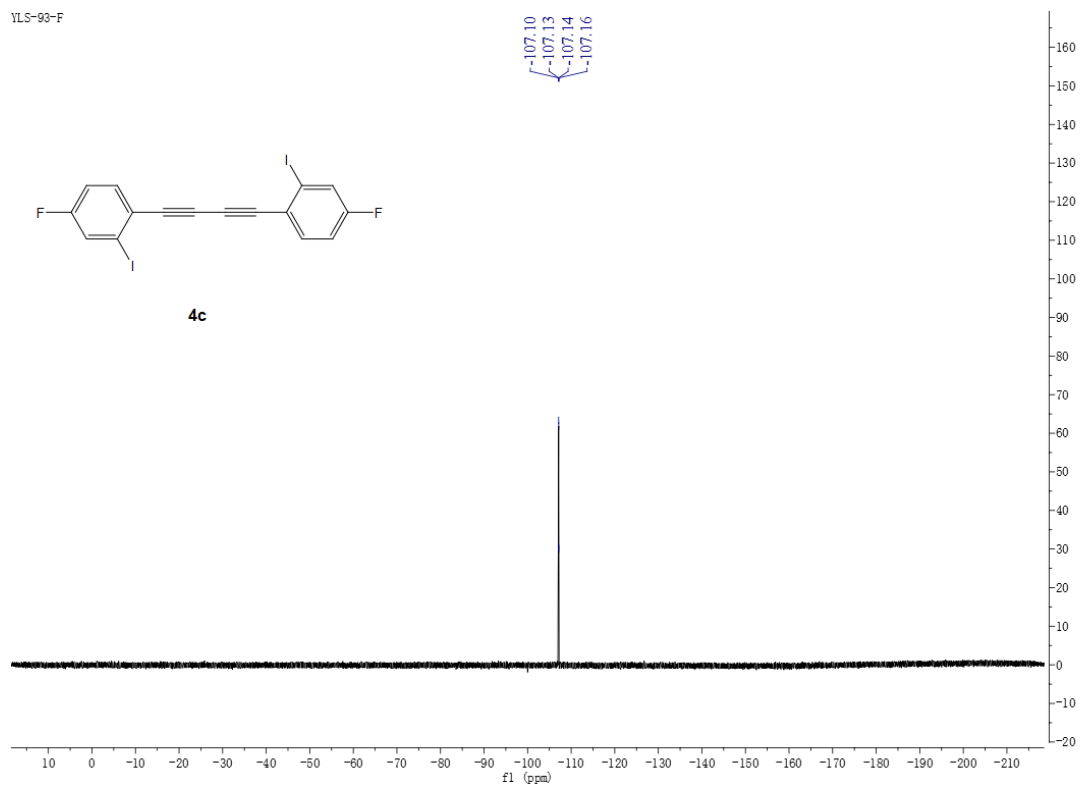

YLS-89

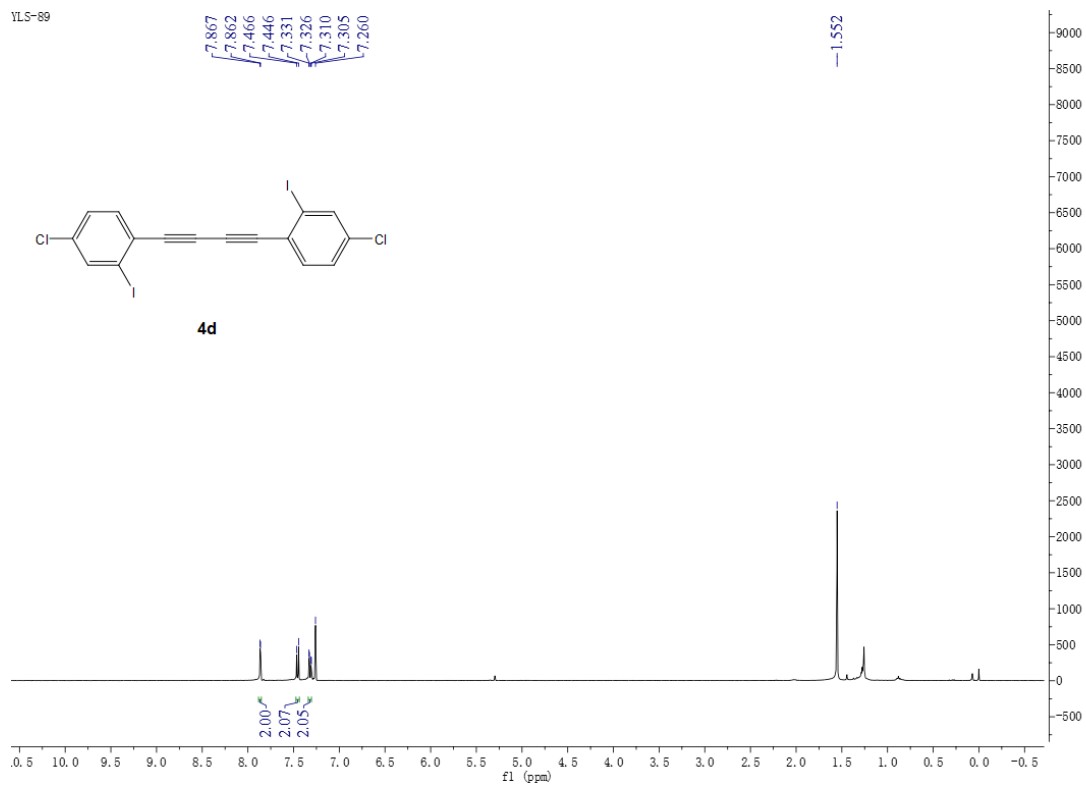

YLS-89-C

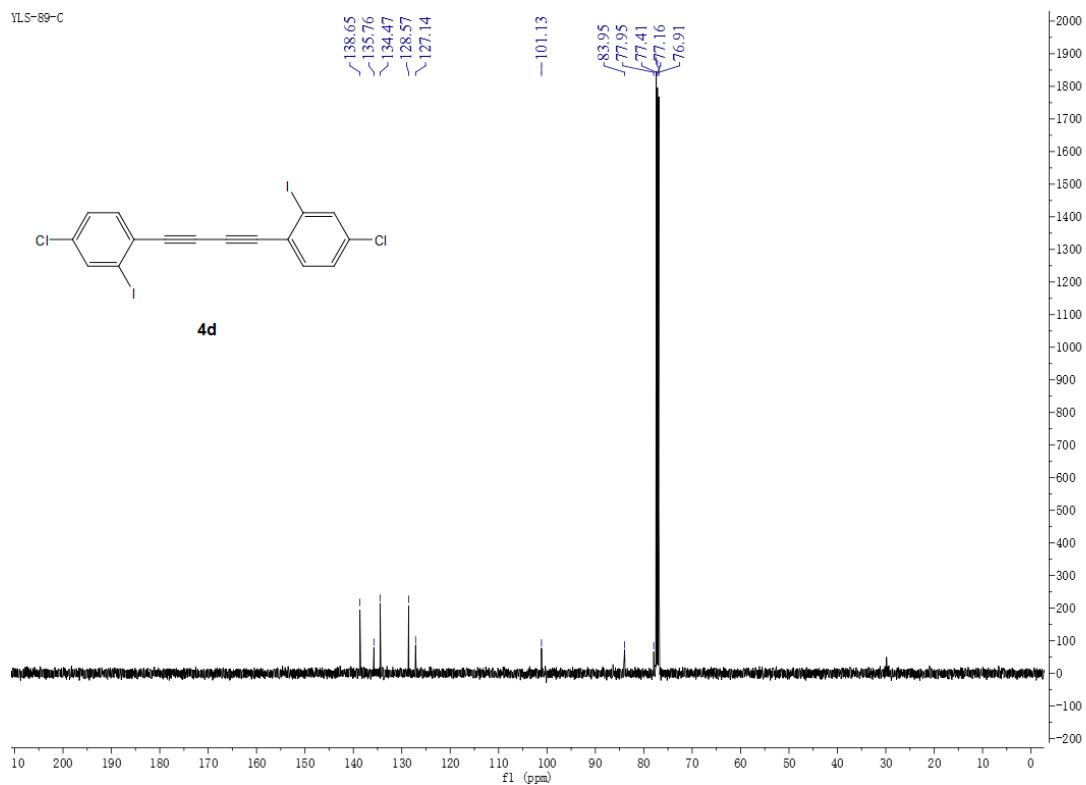

YLS-90

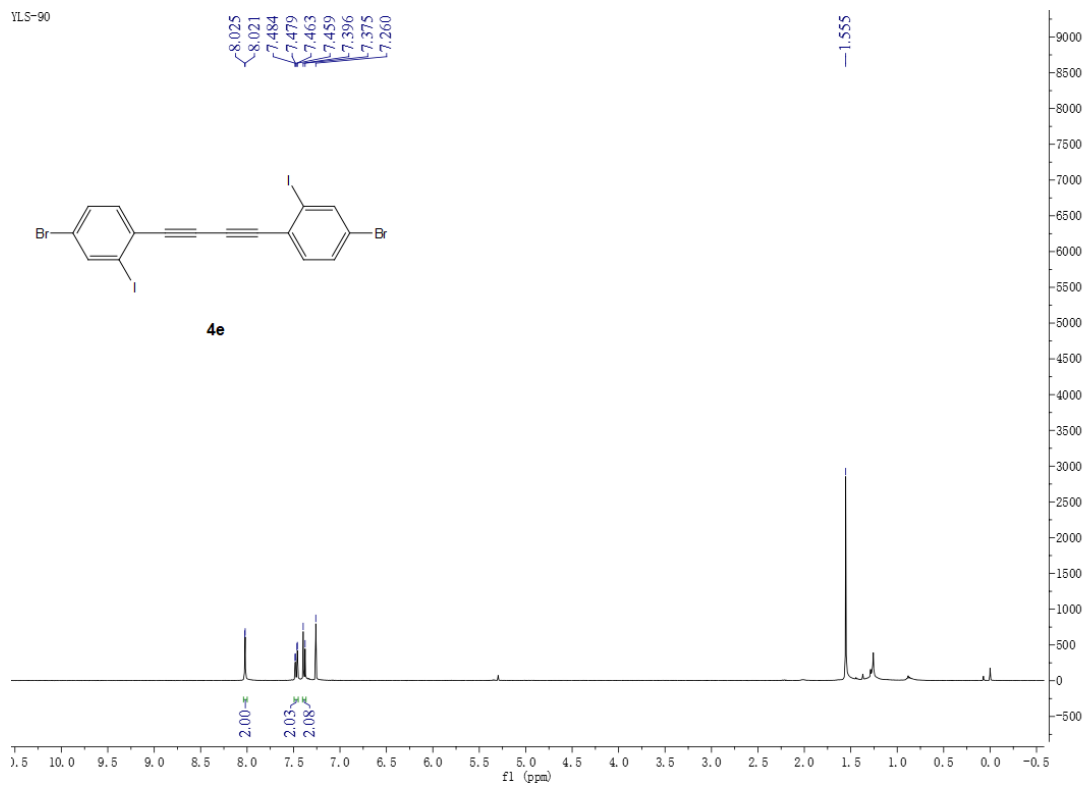

YLS-90-C

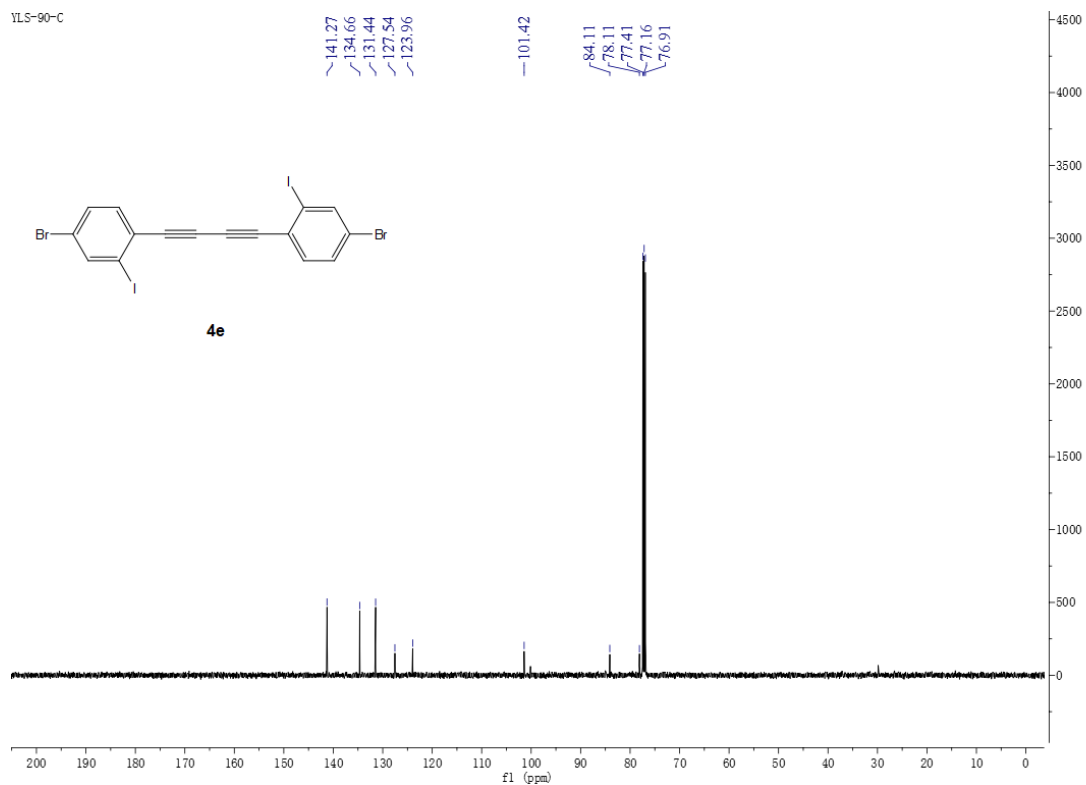

YLS-93

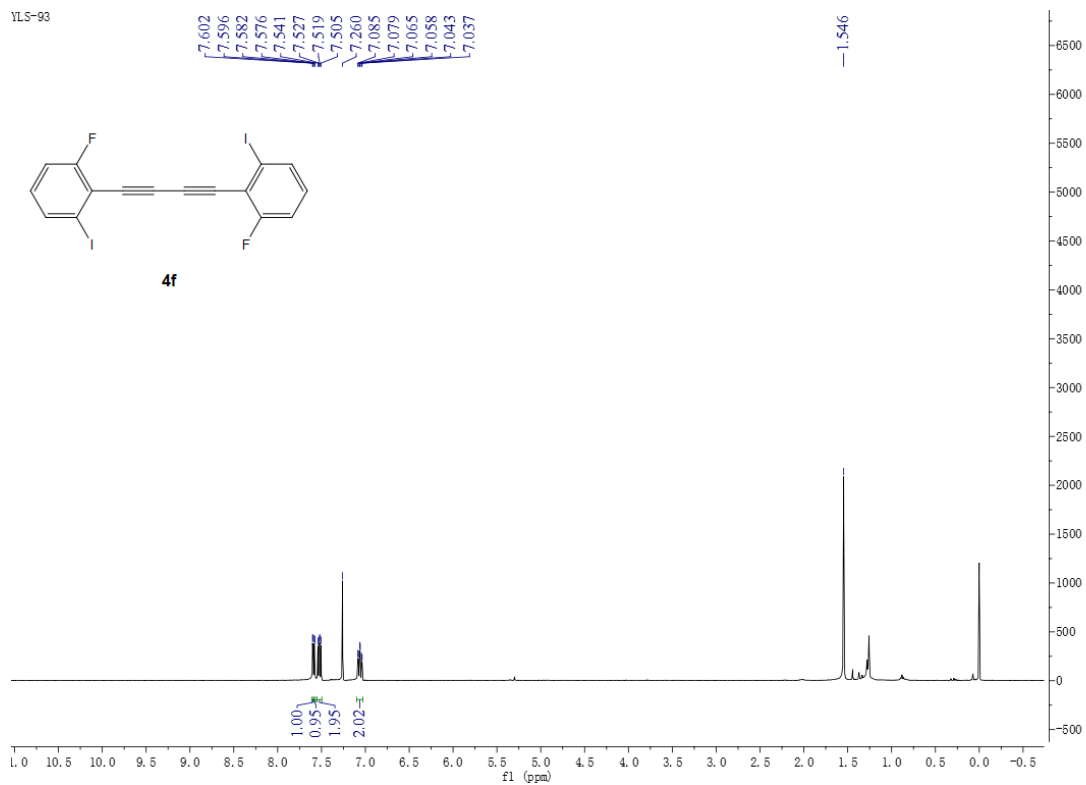

YLS-93-C

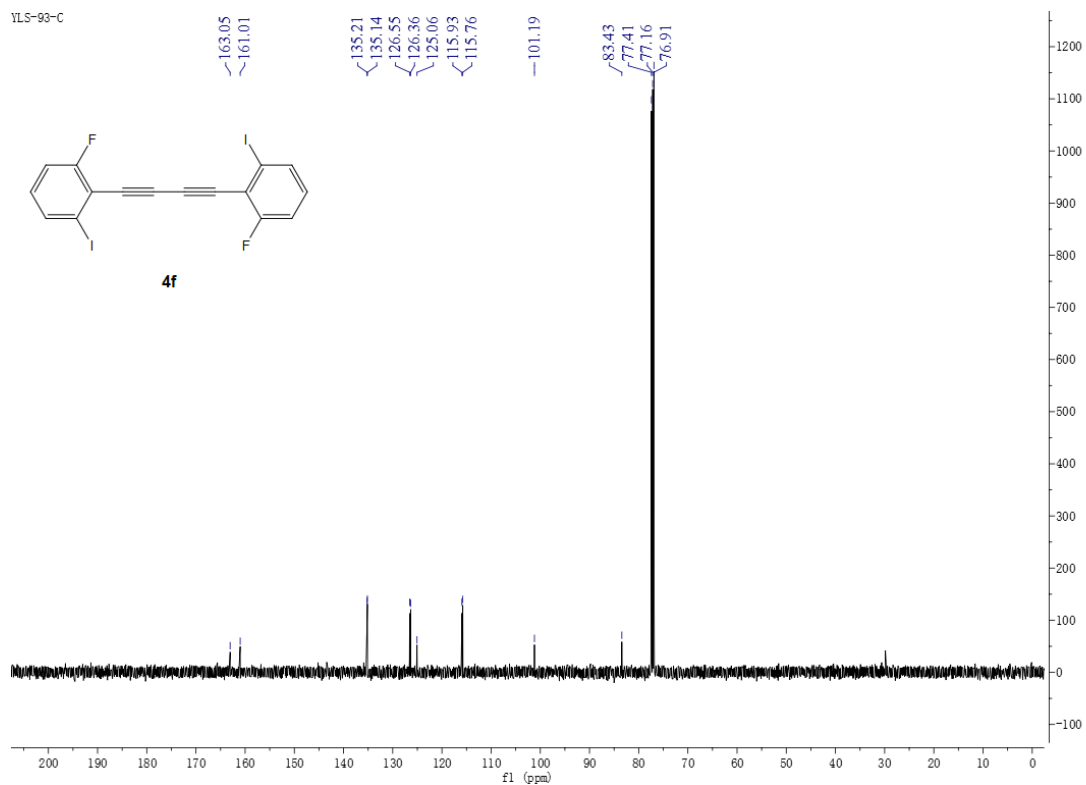



YLS-93-F

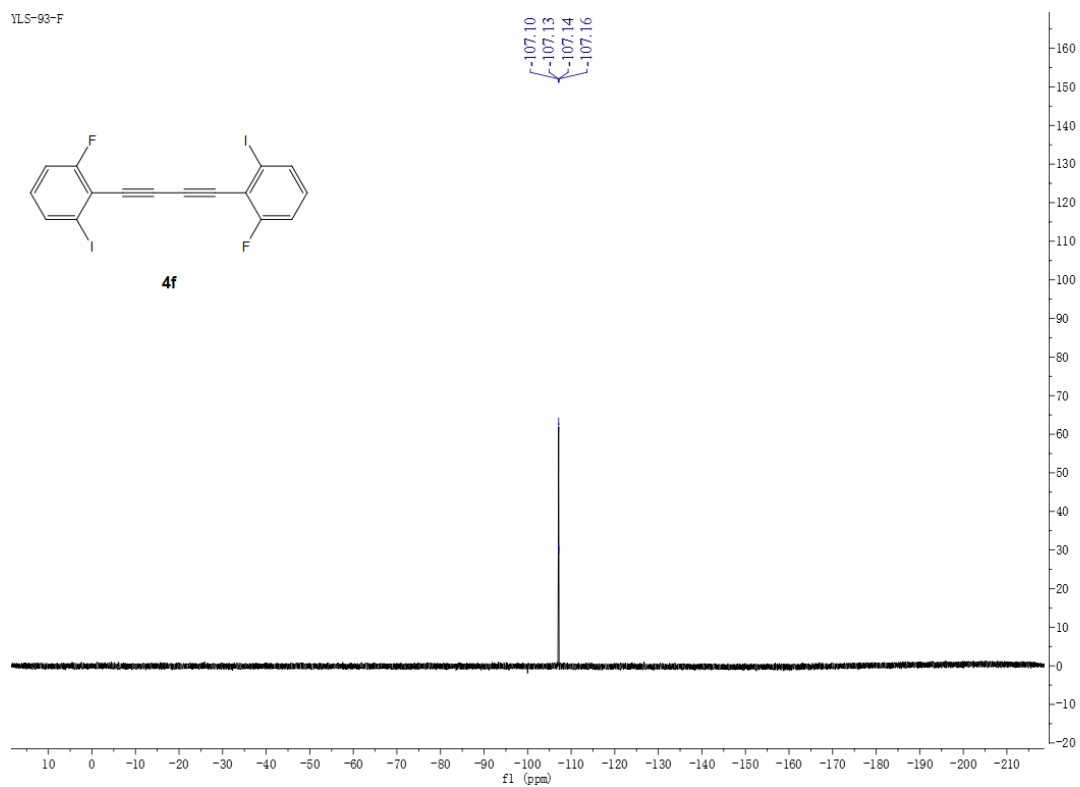

YLS-91

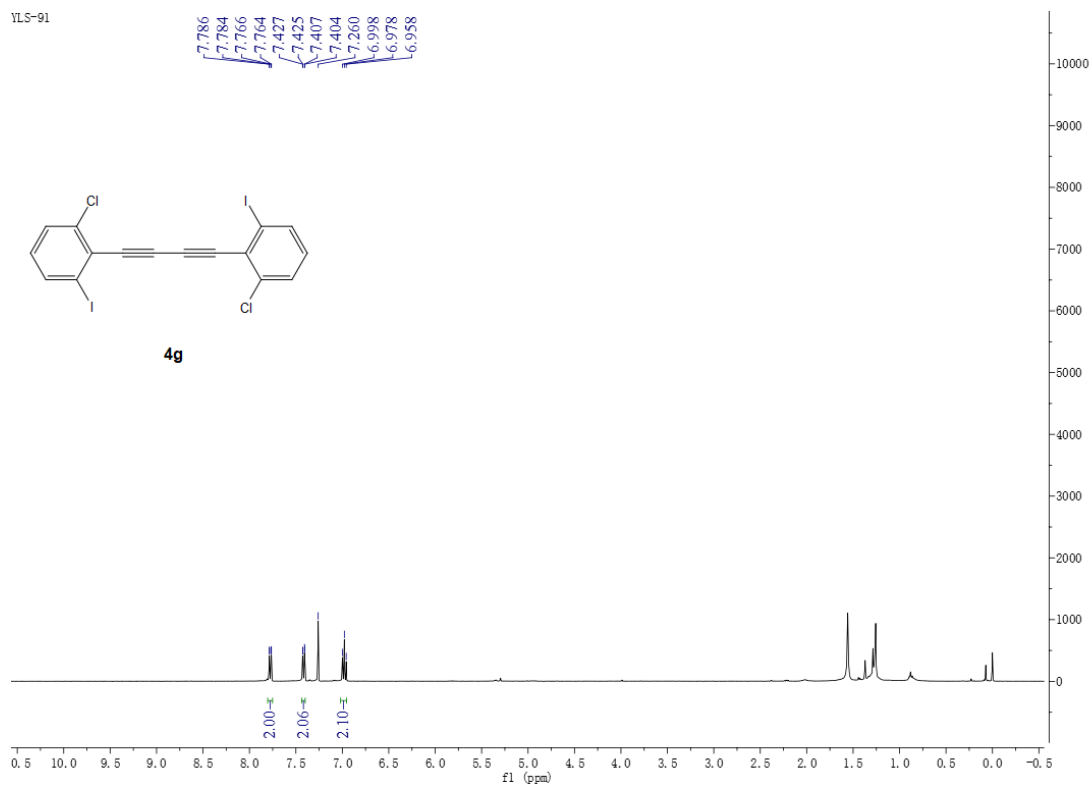

YLS-91-C

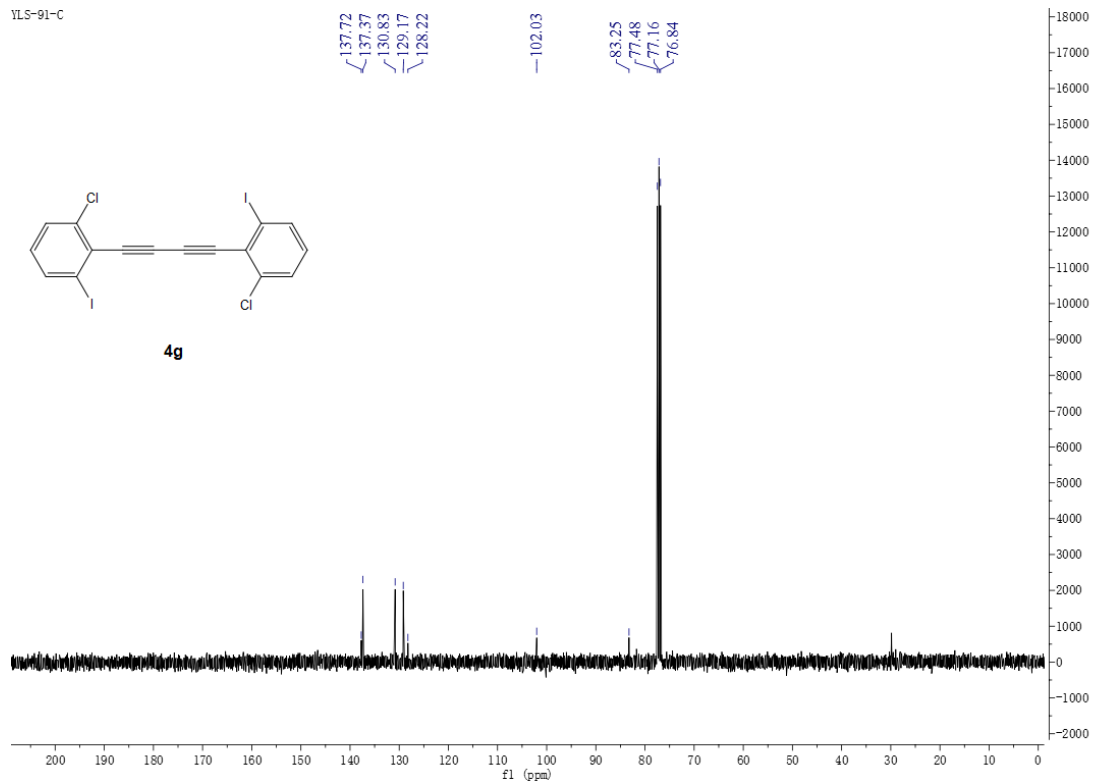

YLS-94

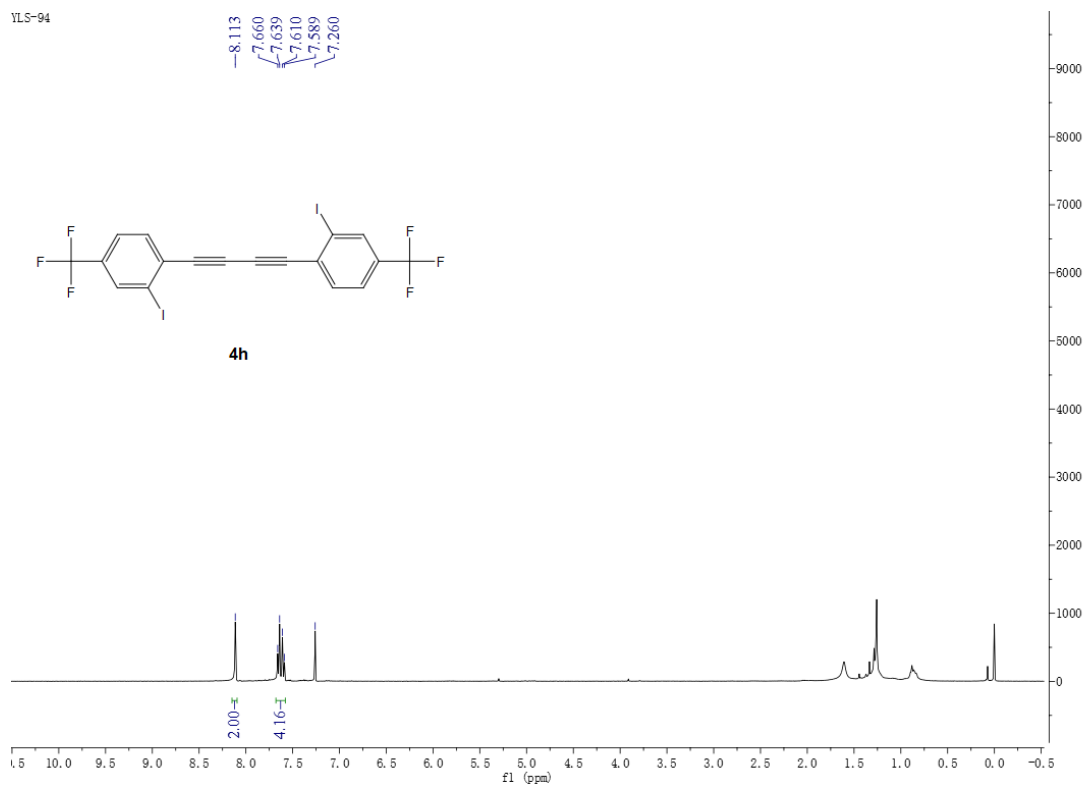

YLS-94-C

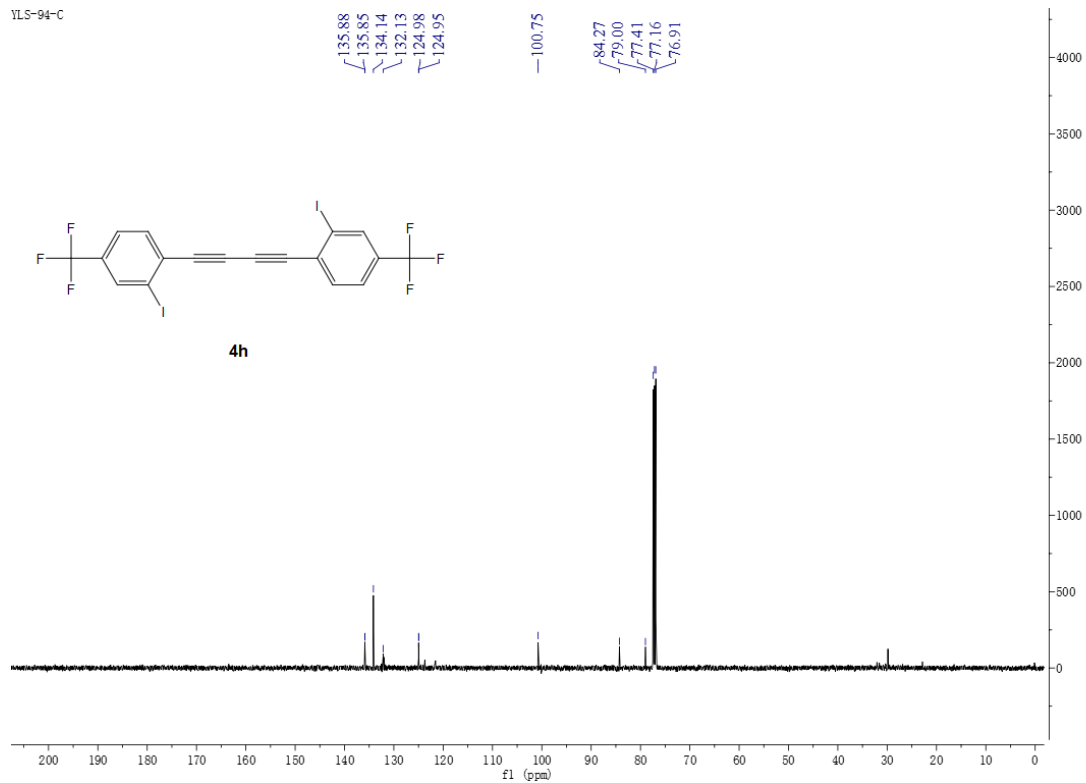

YLS-94-F

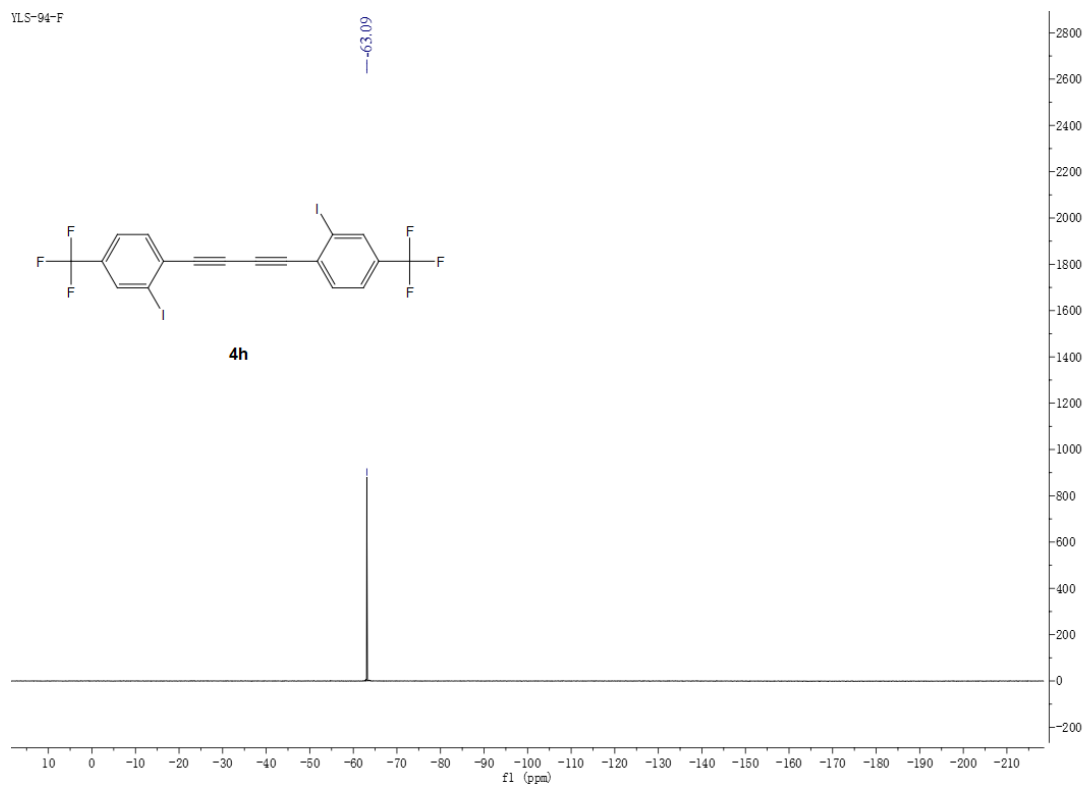

YLS-95 0610

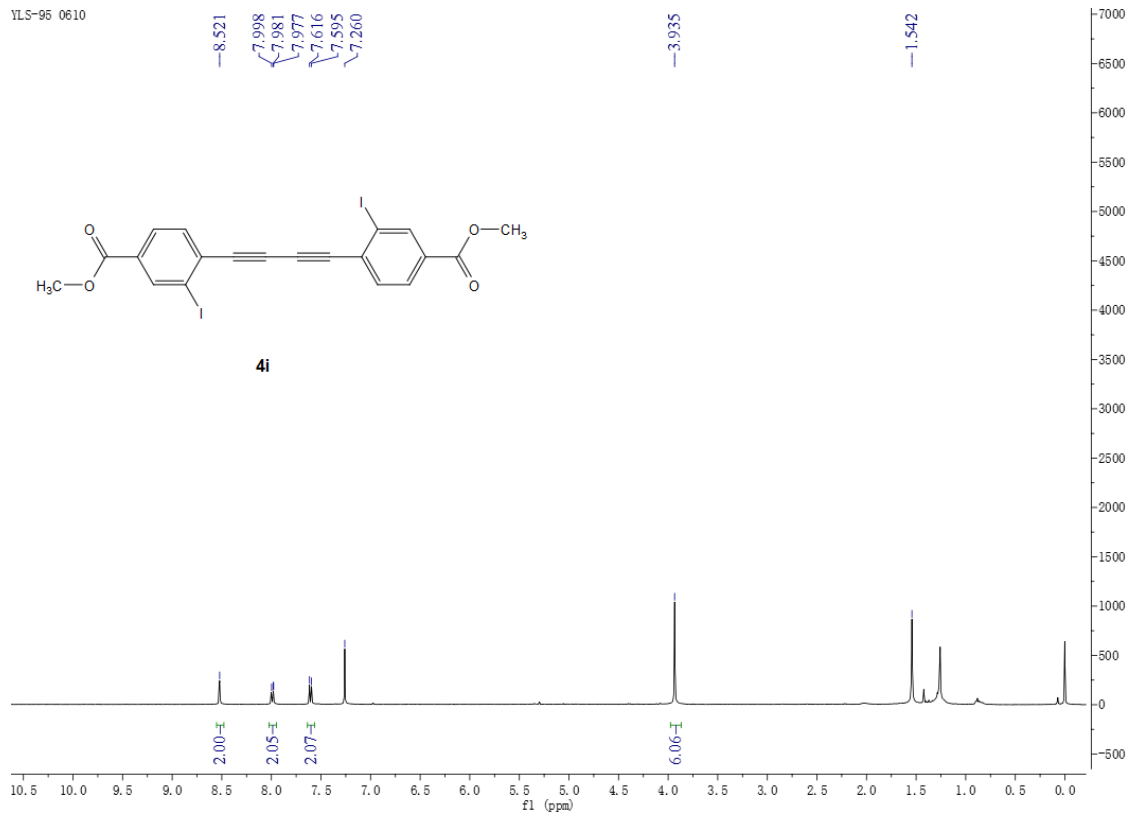

yls95-c

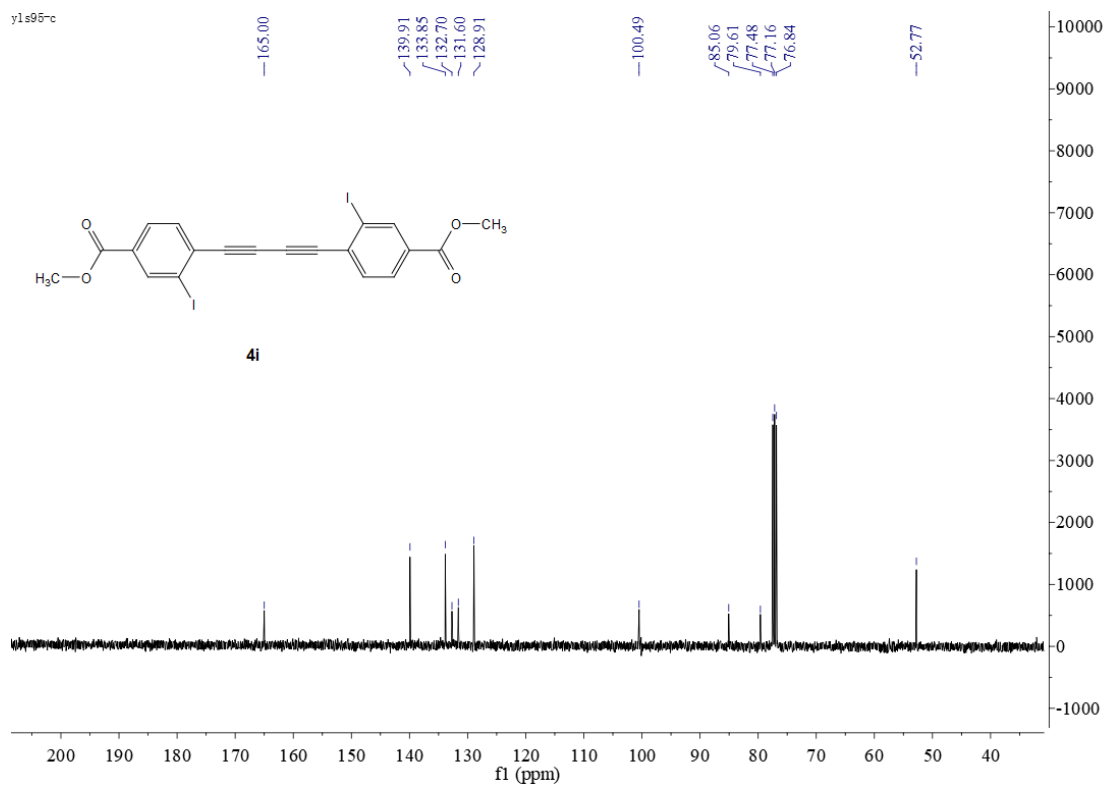

hkt169.10.fid

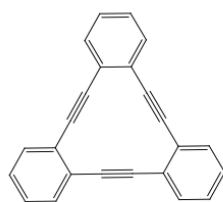

5

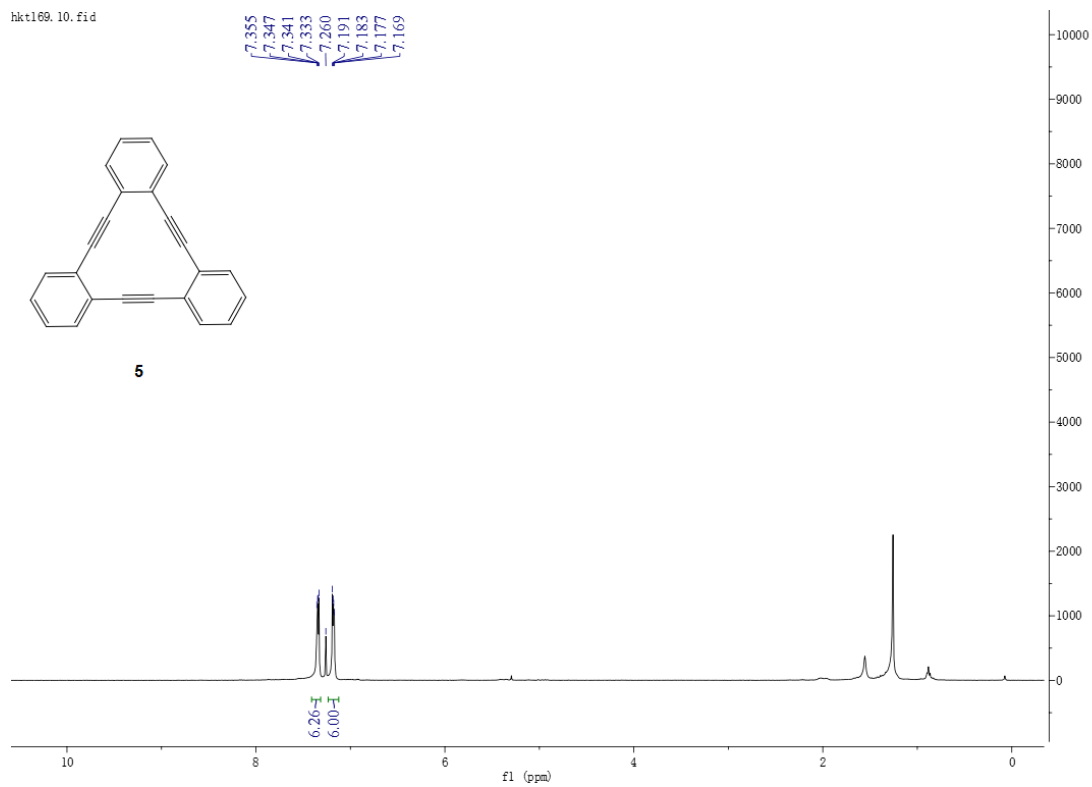

hkt169.3.fid

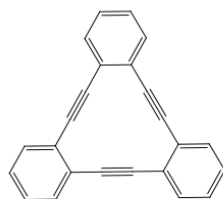

5

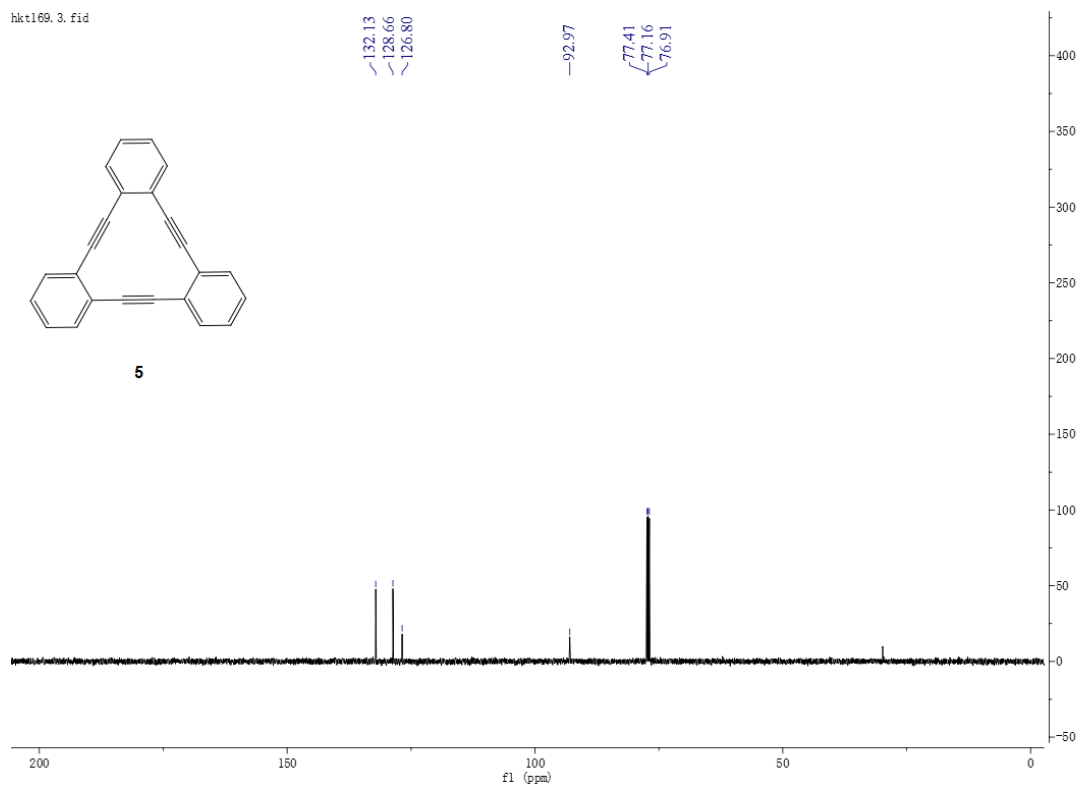

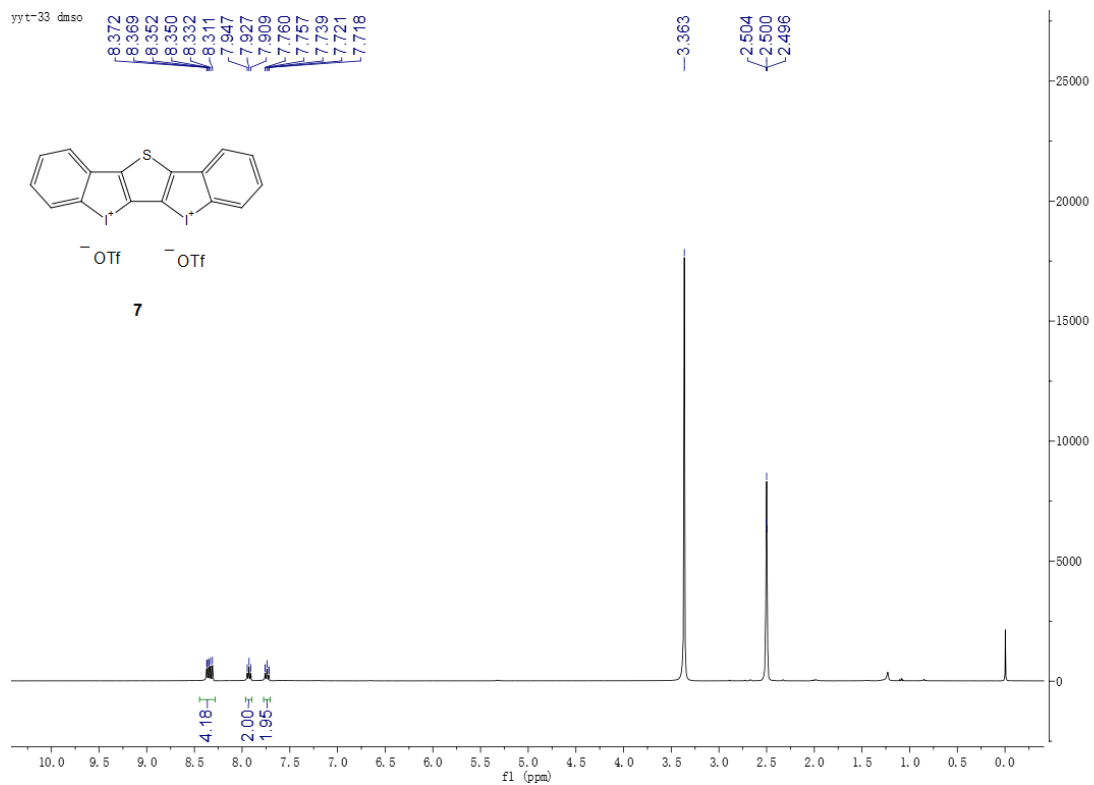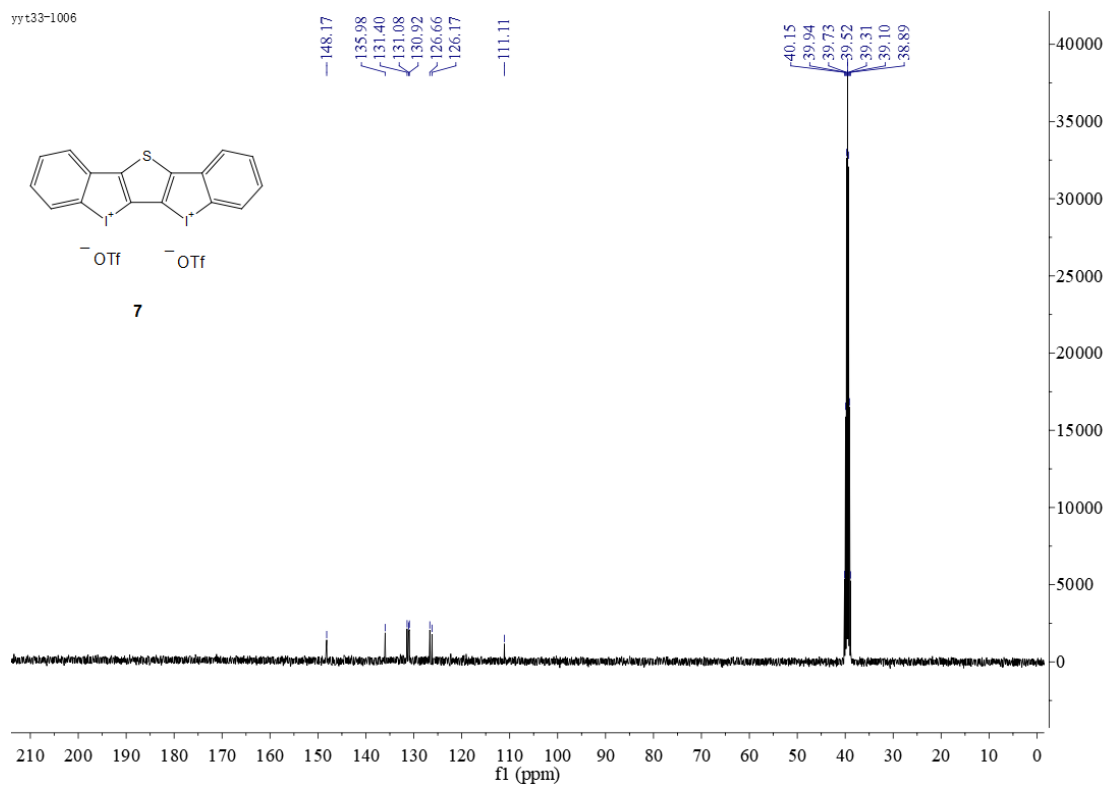

yyt33-1006

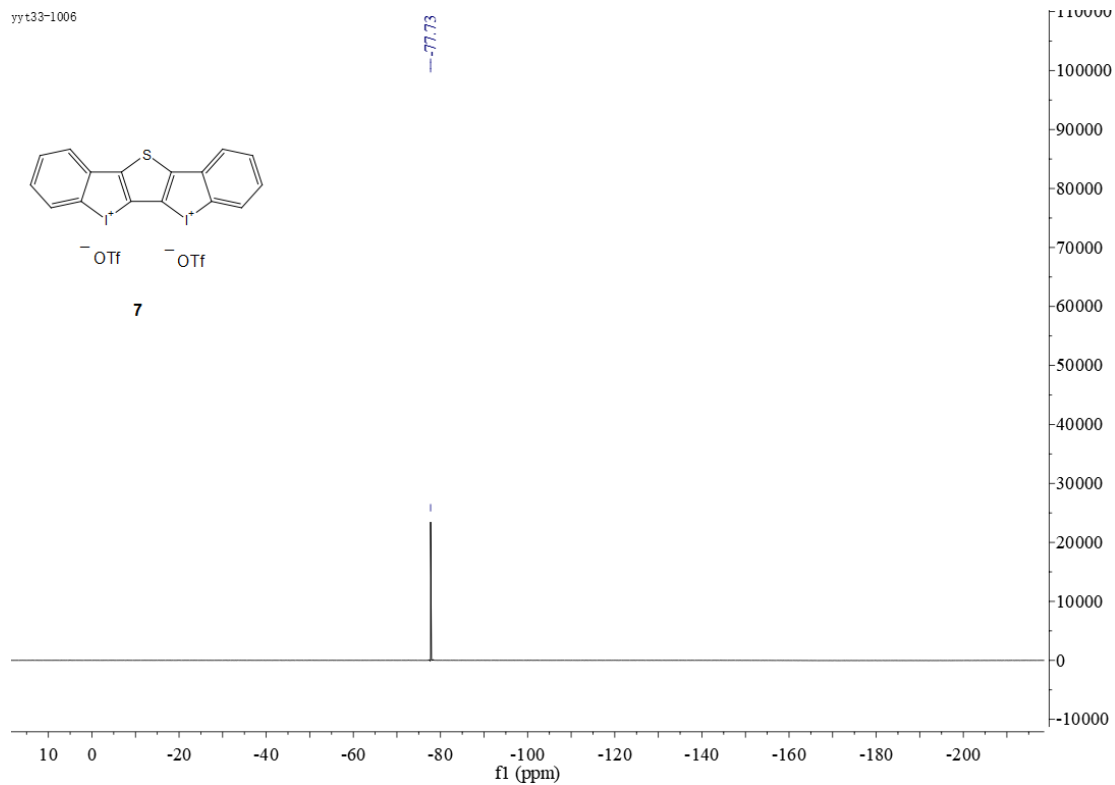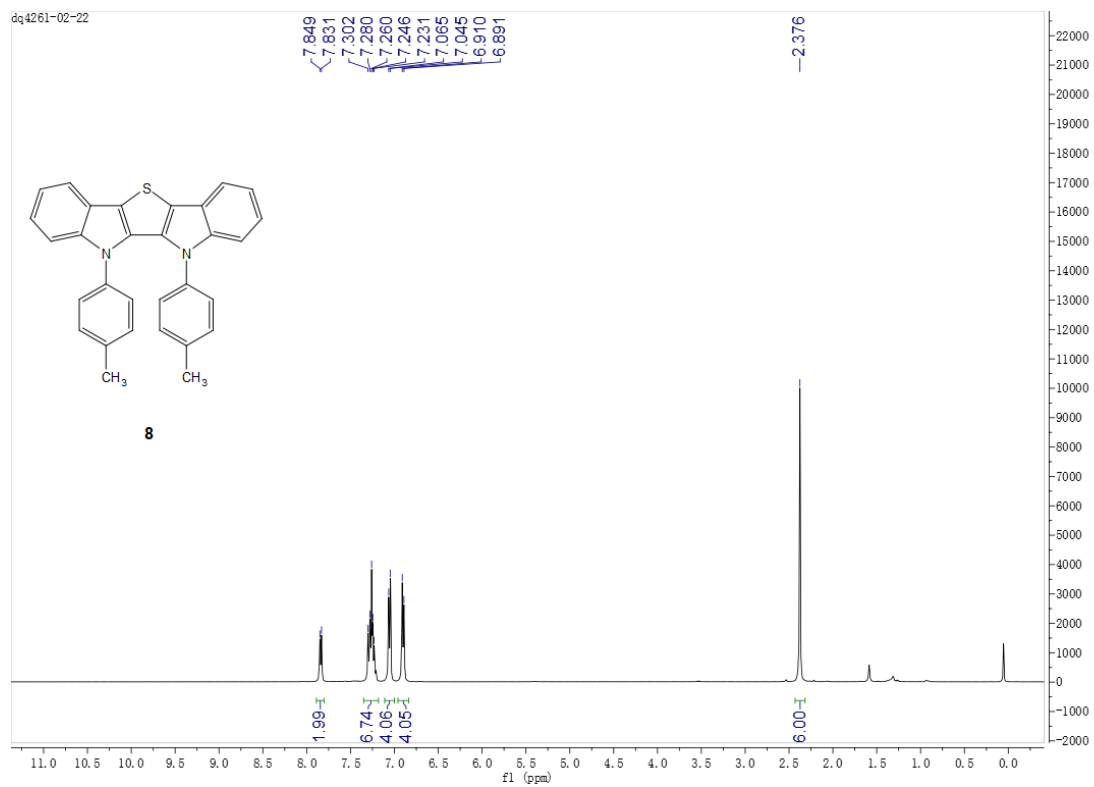

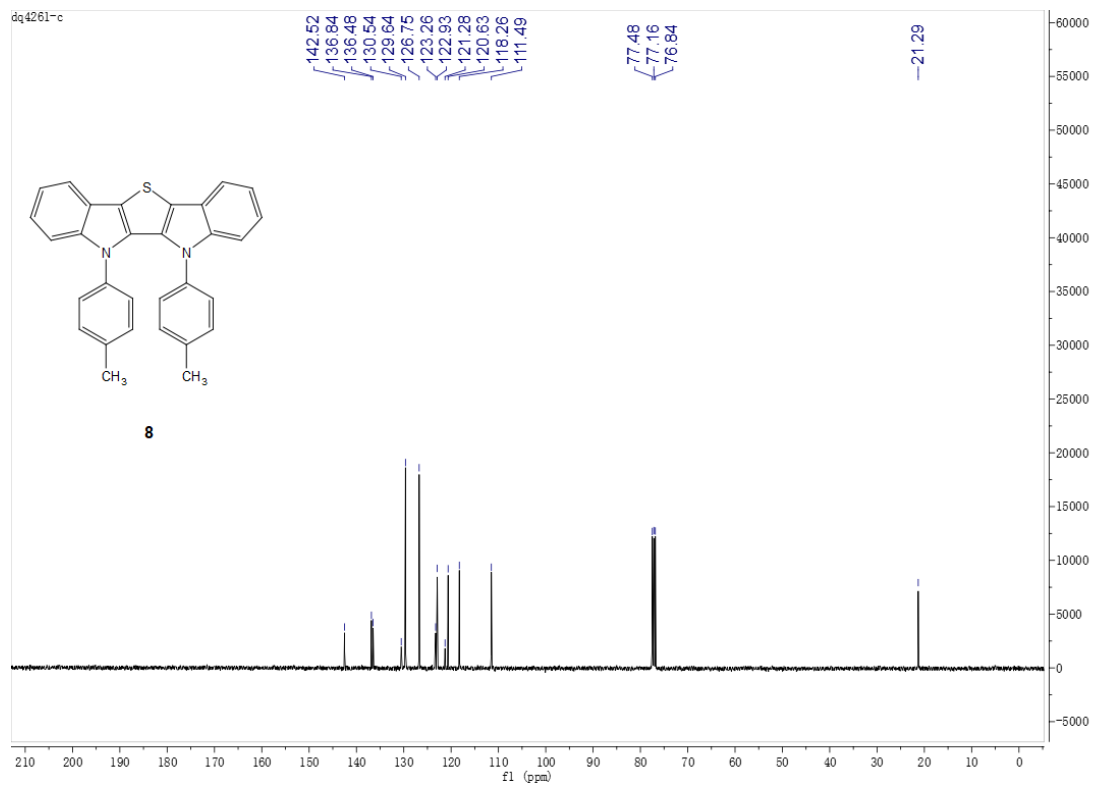

Supplement: d3qo01712e1.pdf [file d3qo01712e1.pdf]
